# Supplementary material for: Genome-wide association studies identified OsTMF as a gene regulating rice seed germination under salt stress
Source: Front Plant Sci. 2024 Mar 27;15:1384246. doi: 10.3389/fpls.2024.1384246 (PMC11004275; doi:10.3389/fpls.2024.1384246)
Supplement: Supplementary file 4 [file Table_1.xlsx]

## Sheet: Table S1
Table S1 A list of 541 rice varieties used in this study, and their phenotypes in seed germinations under salt stress.
Variety ID	Variety name	Subpopulations	Countries of origins	Germination rate grades on the 3rd day (GRG3)		Germination rate grades on the 4th day (GRG4)		Germination indexed grades (GIG)
				0.3% NaCl	0.5% NaCl	0.3% NaCl	0.5% NaCl	0.3% NaCl	0.5% NaCl
L_001	ALTAMIRA 9	Indica	Nicaragua	6	9	1	3	4	5
L_002	BUE GA WA	Japonica	Thailand	4	6	2	3	3	3
L_003	IR 63295-AC 209-7	Indica	Philippines	1	6	4	5	1	2
L_004	JAERAERYUKDO	Japonica	South Korea	3	7	1	3	2	4
L_005	M 7	Japonica	The United States	7	10	5	2	4	4
L_006	MOROFIN	Japonica	Ivory Coast	8	11	2	3	3	5
L_007	BOCAO	Japonica	Philippines	9	10	5	4	4	4
L_008	19	Indica	India	1	2	2	2	4	5
L_009	ARC 11751	Aus	India	8	9	1	3	3	4
L_010	ARC 12101	Aus	India	7	11	1	3	3	4
L_011	ARC 12690	Indica	India	4	6	2	3	5	5
L_012	ARC 13204	Admix	India	4	5	1	1	5	5
L_013	ARC 14975	Indica	India	2	4	1	2	5	5
L_014	ARC 7336	Aus	India	9	10	2	3	5	4
L_015	AUS 278	Aus	Bangladesh	5	8	2	3	4	5
L_016	AUS 344	Aus	Bangladesh	6	8	2	4	3	4
L_017	BKN-BR-1031-78-5-4	Indica	India	9	9	6	5	4	4
L_018	BONG SEN	Indica	Vietnam	2	4	2	1	3	3
L_019	BUNTU DOMBA 1	Japonica	Indonesia	9	11	5	7	3	4
L_020	C 1016-1	Indica	Philippines	7	7	2	3	3	3
L_021	CAMPECHE A79	Japonica	Mexico	3	8	2	6	1	3
L_022	CHAN KU	Indica	China	2	2	2	1	3	3
L_023	CHAO DO	Indica	Laos	5	7	1	2	4	4
L_024	CHING-LIU	Indica	Taiwan	2	4	1	2	4	4
L_025	DA HEI GU	Indica	China	3	6	2	3	6	6
L_026	DELI POCONG	Indica	Indonesia	8	9	1	2	4	3
L_027	Deng nyay	Japonica	Laos	11	11	10	10	5	5
L_028	DJALAWARA	Japonica	Indonesia	9	9	10	9	3	4
L_029	DOGON IRI	Indica	Nigeria	8	8	1	1	3	3
L_030	DONRADAO	Indica	Brazil	9	11	3	4	4	5
L_031	DU GEN CHUAN	Indica	China	3	6	2	2	3	4
L_032	EA LOUY	Indica	Laos	6	9	1	1	2	2
L_033	Ea tom	Indica	Laos	8	10	1	3	4	5
L_034	FORTUNA COLORADO	Admix	Central America	11	11	7	4	4	5
L_035	GAO LIANG ZAO	Indica	China	2	2	2	2	4	4
L_036	GASMAL 339	Basmati	Bangladesh	6	10	1	2	3	4
L_037	GUDURA	Basmati	Nepal	1	3	1	1	1	2
L_038	HEI YAN ZHAN	Indica	China	3	4	2	2	3	2
L_039	HSIN-T'AO-YUAN-CHING-YU	Basmati	Taiwan	4	8	2	1	2	3
L_040	IR 4683-54-2	Indica	Philippines	7	10	1	3	3	5
L_041	IR 5657-33-2	Indica	Philippines	10	8	2	3	5	4
L_042	ITA 245	Indica	Nigeria	6	9	1	4	3	4
L_043	JIA GEN	Indica	China	2	6	1	2	4	5
L_044	JUAN YE LAI	Japonica	China	5	5	3	2	4	3
L_045	KASHA	Basmati	Bangladesh	9	11	6	4	5	6
L_046	KAUK HNYINGWA	Indica	Myanmar	10	11	3	6	5	6
L_047	KAYELI KUNING	Japonica	Indonesia	10	11	9	8	6	7
L_048	KETAN MLANTING	Japonica	Indonesia	8	11	7	7	4	6
L_049	Khao non	Indica	Laos	6	7	2	3	4	5
L_050	GAEW DAENG	Indica	Thailand	7	10	3	4	3	4
L_051	LIU LI YOU	Indica	China	6	11	1	3	3	5
L_052	LOUK PASOM	Indica	Laos	4	6	2	2	3	3
L_053	LUO SI ZHAN	Indica	China	1	7	3	2	1	2
L_054	LWANKHAN	Indica	Myanmar	10	11	6	5	4	4
L_055	MAGU	Indica	China	5	6	3	3	3	3
L_056	MALOBA(DISSI ROUGE)	Indica	Burkina Faso	3	6	1	1	3	4
L_057	MURGI BRINJ	Indica	Pakistan	7	11	6	6	2	4
L_058	NCS458	Indica	India	1	3	1	1	4	5
L_059	NCS603 B	Indica	India	4	11	5	8	1	4
L_060	NCS771 A	Indica	India	5	10	4	5	2	4
L_061	Ngan tia	Indica	Laos	9	11	5	7	4	5
L_062	NOON SOUNG	Indica	Laos	6	7	1	3	3	4
L_063	NS199	Indica	Ivory Coast	7	7	3	3	4	4
L_064	NULI	Indica	Bangladesh	2	5	1	1	4	4
L_065	P 41	Basmati	Liberia	11	11	11	10	3	4
L_066	PADI GRUNDUL 1	Indica	Indonesia	9	10	4	3	6	5
L_067	PAUNDRI	Indica	India	2	3	2	2	2	4
L_068	POONGAR	Indica	India	3	5	1	2	3	4
L_069	P-PEY SIQAT	Japonica	Philippines	9	11	5	7	2	3
L_070	PR106	Indica	India	6	9	2	4	3	5
L_071	QI GU	Indica	China	6	9	1	3	3	5
L_072	QING TAI AI	Indica	China	7	9	3	3	5	6
L_073	RAM SALEE KATAKA	Basmati	Nepal	3	7	1	2	4	5
L_074	RANRUWAN	Aus	Sri Lanka	7	11	6	7	3	4
L_075	RUS RUSSEI	Indica	Cambodia	8	11	1	5	1	3
L_076	SAM SI	Indica	Laos	7	10	3	4	4	5
L_077	SANTHI 206	Aus	Pakistan	6	9	4	4	4	5
L_078	SHAN GU	Indica	China	5	10	1	2	4	5
L_079	SI CHAO 1	Indica	China	8	11	3	5	4	4
L_080	SINDANO3	Indica	Kenya	7	8	2	3	3	3
L_081	SPR7284-57-5	Indica	Thailand	11	10	6	7	4	4
L_082	TAICHUNG 150	Japonica	Taiwan	6	8	3	1	3	2
L_083	UPRH58	Aus	India	3	8	4	7	1	4
L_084	VELLAI KOLOMBAN	Indica	Sri Lanka	7	9	5	7	3	4
L_085	VUOTTA SAIL	Indica	Bangladesh	4	7	2	3	2	3
L_086	WAGWAG	Indica	Philippines	5	8	1	3	2	3
L_087	WAGWAG RAOIS	Indica	Philippines	7	9	3	4	4	4
L_088	YAH TOW	Indica	Thailand	8	11	4	6	4	6
L_089	YERI BUTUKA	Admix	Nigeria	6	9	3	3	3	4
L_090	YUN NAN ZHAN	Indica	China	3	7	1	1	1	2
L_091	ZAO LENG SHUI ZHAN	Indica	China	5	9	2	3	3	4
L_092	ZARBASAIL	Aus	Bangladesh	9	11	7	6	3	3
L_093	34	Aus	Pakistan	6	7	3	4	3	4
L_094	ANBAW	Indica	Myanmar	3	6	1	3	2	3
L_095	ARC 12180	Indica	India	5	8	3	1	3	2
L_096	ARC 12559	Indica	India	1	6	2	4	1	2
L_097	ARC 13888 BROWN SPOTS ON STRAW	Indica	India	3	5	2	2	3	3
L_098	ARC 15455	Indica	India	3	6	2	1	3	3
L_099	ARC 18371	Indica	India	3	6	2	4	3	5
L_100	BADAL	Indica	Bangladesh	2	6	2	2	2	3
L_101	BANCHI	Indica	India	1	3	1	1	2	2
L_102	BELLO	Indica	India	3	8	1	3	3	4
L_103	BR116-3B-53	Indica	Bangladesh	2	4	1	3	5	5
L_104	BR52-87-1	Indica	India	2	3	1	1	1	2
L_105	BUCHI	Basmati	India	4	9	1	1	2	3
L_106	C 34-13	Indica	Myanmar	2	6	1	2	2	3
L_107	CHILE BORO	Aus	India	2	5	2	2	4	5
L_108	CHINA 1039 MUTANT(DWARF)	Indica	China	3	10	1	3	1	4
L_109	DAMNOEUB KHSE SAUT	Indica	Cambodia	6	11	1	5	2	4
L_110	DAMNOEUB THPOIL HING	Indica	Cambodia	3	9	2	4	1	4
L_111	DUDHSAR	Indica	Bangladesh	7	11	2	2	4	5
L_112	EA DAM HANG DOK	Indica	Laos	9	11	5	6	4	6
L_113	GAHB AWY 2-1	Indica	Thailand	4	5	2	2	4	4
L_114	HAM MOON	Indica	Hong Kong	3	6	1	2	5	5
L_115	HANPA	Aus	Bangladesh	8	11	3	6	4	5
L_116	HTAWPATT	Indica	Myanmar	7	11	7	8	3	5
L_117	KEO LAI	Indica	Laos	7	6	4	5	4	3
L_118	KEYA NUNIA	Basmati	India	6	6	2	4	3	3
L_119	KHAO DAWK MALI TIA	Indica	Thailand	7	11	7	10	3	7
L_120	KHAYANGYA D 34-181	Indica	Myanmar	4	6	3	3	4	4
L_121	KUMRI	Indica	Bangladesh	4	7	1	3	2	3
L_122	MAUNG NYO	Indica	Myanmar	9	11	6	9	4	5
L_123	MOROM	Indica	Cambodia	8	10	4	6	3	4
L_124	NGASEIN THEEDAT(C 30)	Indica	Myanmar	7	8	6	4	4	4
L_125	PAIRJAT	Indica	Bangladesh	9	8	5	5	4	3
L_126	PANIKELASH	Indica	India	3	5	1	1	2	2
L_127	PHAN PHAE	Indica	Laos	8	11	6	6	5	5
L_128	PINILING DANIEL	Indica	Philippines	7	8	2	3	3	3
L_129	SHWENI	Indica	Myanmar	7	10	3	5	3	5
L_130	SIDJERO GUNDIL	Japonica	Indonesia	6	10	3	4	3	4
L_131	TAMBA PERAK	Indica	Indonesia	3	6	1	1	3	3
L_132	TANBAUNG	Indica	Myanmar	7	7	9	6	3	4
L_133	TERUNG DAUN	Indica	Indonesia	7	11	6	6	3	4
L_134	THAO LOUANG	Indica	Laos	7	10	2	5	3	4
L_135	TUPA 15-3	Basmati	Bangladesh	8	9	5	4	5	5
L_136	SWARNA	Indica	Philippines	3	9	1	3	1	4
L_137	FEDEARROZ 50	Indica	Philippines	2	4	2	1	3	3
L_138	250 KUNGANI 1	Japonica	Japan	4	7	4	4	3	4
L_139	ARC 10537	admix	India	2	5	3	3	4	5
L_140	ARC 13373	Indica	India	9	10	5	5	5	5
L_141	ARC 15097	Indica	India	7	8	1	3	3	3
L_142	ARC 15862	Indica	India	5	8	2	2	4	4
L_143	CHUBU 17	Japonica	Japan	6	7	3	3	4	4
L_144	DECHANGBYEO	Admix	South Korea	6	9	1	4	3	5
L_145	DILBAKSH	Indica	India	5	5	2	2	4	3
L_146	DO LEUANG	Japonica	Laos	6	8	2	3	3	4
L_147	E-NOI NAH	Indica	Thailand	11	9	4	3	5	5
L_148	GEM OU BRAZIL	Japonica	Brazil	7	10	2	2	3	3
L_149	GINATOS	Japonica	Philippines	7	11	2	3	3	4
L_150	GONG SHE 9	Japonica	China	2	4	1	1	2	2
L_151	HIRA NAKHI	Indica	India	6	7	6	3	4	2
L_152	IAS22-8 PALMAR	Japonica	Brazil	2	4	2	2	4	5
L_153	IB95	Japonica	Ghana	7	10	1	3	3	4
L_154	K 113	Japonica	India	3	7	2	2	4	5
L_155	KABERI	Indica	Bangladesh	4	7	3	4	5	7
L_156	KAO SONG HAI	Indica	China	2	4	2	1	4	4
L_157	KARUEL	Indica	Nepal	2	8	1	1	4	6
L_158	LENKIBE-N	Japonica	Philippines	9	11	9	9	3	4
L_159	LEUANG	Japonica	Laos	9	11	5	6	5	7
L_160	MALAGASY	Indica	Zambia	6	9	1	3	4	5
L_161	MARHARORA	Admix	Zimbabwe	2	5	1	2	1	3
L_162	MA SHE 8	Japonica	China	1	3	1	1	1	2
L_163	MOLOG	Japonica	Indonesia	7	9	2	4	3	3
L_164	CALENDAL	Japonica	France	4	8	2	3	3	4
L_165	PADI ABUNG KUNING	Japonica	Indonesia	9	11	3	4	3	4
L_166	PADI RENDAH	Japonica	Indonesia	11	11	5	8	3	4
L_167	PL 3165	Japonica	China	6	10	2	4	4	5
L_168	R 762	Aus	Colombia	5	10	2	3	4	6
L_169	TAM	Indica	Laos	11	11	9	10	5	5
L_170	TINAROH	Japonica	Indonesia	10	11	8	7	5	5
L_171	T.Q.QI. HAYUQBABA	Indica	Philippines	9	11	6	7	4	5
L_172	WAN GENG BAI DAO TOU	Japonica	China	6	6	2	3	3	2
L_173	ZIRA SHAHI	Admix	Pakistan	2	5	1	3	1	2
L_174	ERNEST	Indica	Senegal	3	8	1	1	2	3
L_175	LIONG ORN	Indica	Philippines	6	9	1	1	2	3
L_176	IET 14720	Japonica	Philippines	9	11	2	7	1	5
L_177	PAGAIYAHAN	Indica	Taiwan	7	11	6	7	6	8
L_178	HOLOI BASH(SOLOI BASH)	Aus	Bangladesh	3	6	2	3	1	2
L_179	IRGA 318-11-6-9-2B	Indica	Colombia	6	8	1	1	3	4
L_180	CIWINI SML	Admix	Surinam	8	11	8	8	5	6
L_181	GEANT W 7	Indica	Netherland	6	10	2	5	3	5
L_182	BAT DO	Indica	Vietnam	3	7	1	2	2	3
L_183	JABOR SAIL	Aus	Bangladesh	1	9	3	5	1	3
L_184	SR26 B	Indica	India	9	11	4	5	4	6
L_185	SAGRES	Japonica	Portugal	6	10	3	5	3	5
L_186	BERENJ 1277 S	Admix	Afghanistan	9	8	6	4	3	2
L_187	75 UPLA	Japonica	Argentina	4	8	4	3	1	3
L_188	ALEXANDROS	Japonica	Greece	7	10	4	5	3	5
L_189	ARLESIENNE	Japonica	France	5	4	4	3	5	4
L_190	CLOT	Japonica	Spain	4	7	3	3	4	4
L_191	CT 36	Japonica	Colombia	4	5	4	3	3	3
L_192	CT 6510-24-1-2	Indica	Colombia	7	8	1	2	3	3
L_193	DAWN CI 9534	Aus	The United States	6	7	2	4	3	4
L_194	FLIPPER	Japonica	Italy	7	8	4	4	4	5
L_195	GIGANTE VERCELLI	Japonica	Italy	4	6	2	3	3	3
L_196	GIZA 178	Indica	Egypt	2	5	1	3	2	3
L_197	IR 57924-24	Indica	Philippines	9	10	3	5	4	5
L_198	IR 72967-12-2-3	Indica	Philippines	8	11	4	5	4	6
L_199	IRAT 234	Japonica	France	6	9	1	3	3	4
L_200	KULON	Japonica	Russia	4	7	4	3	2	3
L_201	L 205	Japonica	The United States	9	10	3	4	4	4
L_202	LOMELLINO	Japonica	Italy	1	4	1	2	1	3
L_203	LOTO	Japonica	Italy	2	4	3	3	5	5
L_204	MEJANES 2	Japonica	France	4	5	3	3	3	3
L_205	MITSANGANAHIJERY	Japonica	Madagascar	7	11	5	4	4	5
L_206	REXMONT	Japonica	The United States	6	7	4	3	3	3
L_207	RUBIDIO	Japonica	Italy	3	6	4	3	3	4
L_208	SHANGAI	Japonica	China	1	7	3	3	2	3
L_209	SETTANTUNO	Japonica	Portugal	6	9	1	2	3	4
L_210	SHSS 53	Japonica	Spain	6	7	1	1	3	3
L_211	VALTEJO	Japonica	Portugal	9	11	3	3	4	5
L_212	WAS 173-B-B-6-2-2	Indica	Senegal	6	8	1	2	3	3
L_213	WAS 21-B-B-20-4-3-3	Indica	Senegal	1	6	1	3	3	4
L_214	GAMBIAKA	Indica	Burkina Faso	7	9	3	3	4	5
L_215	IR 55411-50	Indica	Philippines	9	11	3	3	5	6
L_216	LAITRA	Indica	Madagascar	2	1	2	2	4	3
L_217	TSIPALA 1231	Indica	Madagascar	4	5	3	3	3	3
L_218	TSIPALA B160	Indica	Madagascar	6	6	1	3	3	2
L_219	VARY LAVA DE MAROVATO	Indica	Madagascar	1	2	1	3	1	3
L_220	CALROSE 76	Japonica	The United States	3	6	2	3	2	2
L_221	RIKUTO NORIN MOCHI 20	Japonica	Japan	7	8	6	4	4	4
L_222	EGYPTIAN	Japonica	Turkey	7	9	4	4	4	4
L_223	UNNAMED	Japonica	Thailand	4	6	2	3	2	2
L_224	ARC 11359	Japonica	India	5	9	1	5	2	5
L_225	ARC 14060	Indica	India	4	5	3	3	2	2
L_226	ARC 15873	Indica	India	2	3	2	2	3	2
L_227	ARC 18112	Indica	India	2	3	2	3	2	2
L_228	ARC 5840	Indica	India	1	5	1	1	2	2
L_229	ASHMBER	Indica	Bangladesh	3	7	1	3	2	3
L_230	BLUE BELLE	Japonica	The United States	7	9	2	4	3	3
L_231	CHAKOL	Indica	Bangladesh	6	7	5	4	3	3
L_232	CHALBYEO	Japonica	South Korea	4	5	3	3	3	2
L_233	CHUNG YI	Japonica	China	5	5	1	4	2	3
L_234	ESTRELA A	Japonica	Portugal	4	6	2	3	2	2
L_235	EX FOILAEIN (NAPUTO)	Indica	Mozambique	8	10	3	5	4	5
L_236	E ZI 96	Indica	China	6	8	1	4	4	4
L_237	FACAGRO 64	Indica	Burundi	1	1	1	1	1	2
L_238	FAYA MOSHI	Indica	Tanzania	3	5	2	3	3	2
L_239	FORTUNA INIA	Japonica	ARGENTINA	6	9	1	4	3	5
L_240	GALWAKA HANDERAN	Indica	Sri Lanka	11	11	10	9	5	5
L_241	HUK ZO	Japonica	South Korea	1	2	1	2	1	3
L_242	JANA(NAM)	Japonica	Bhutan	5	6	2	1	2	2
L_243	JAPONES BALILLA	Japonica	Uruguay	4	5	2	3	3	3
L_244	LABRA	Indica	India	4	6	3	3	4	5
L_245	LALKA (LAL DHAN)	Indica	Fiji	2	2	2	2	4	3
L_246	LAYANDABU	Japonica	Indonesia	7	11	3	4	3	4
L_247	LEAD	Indica	Malawi	2	4	2	3	1	3
L_248	LEUANG GLIANG	Indica	Thailand	9	11	5	5	3	4
L_249	MIN ZAO 6	Indica	China	2	4	3	3	5	4
L_250	NCS194	Indica	India	2	3	2	1	5	5
L_251	NONG KE	Japonica	China	4	4	2	1	4	4
L_252	OEIRAS	Japonica	Portugal	5	10	3	5	3	5
L_253	OWARI MOCHI	Japonica	Japan	1	3	3	3	3	3
L_254	PIN GAEW 56	Indica	Thailand	9	11	6	6	4	6
L_255	RIZ INDETERMINE	Indica	Niger	6	8	1	4	4	5
L_256	SADA RUPA	Indica	Bangladesh	3	6	3	3	4	4
L_257	SUWEON 311	Indica	South Korea	6	11	3	6	3	6
L_258	TAIPEI WOO-CO	Indica	Taiwan	4	9	2	3	4	5
L_259	TAKAO MOCHI	Japonica	Japan	4	8	4	3	4	3
L_260	TEPUKE	Japonica	New Zealand	5	11	2	4	3	5
L_261	TEXAS PATNA 49	Japonica	The United States	10	11	6	6	3	3
L_262	TOC-5430	Indica	Panama	8	11	2	4	4	4
L_263	YONG AN HUK	Japonica	South Korea	2	6	1	1	3	4
L_264	YOSHINO MOCHI	Japonica	Japan	5	9	3	3	4	5
L_265	AMISTAD 82	Indica	Cuba	6	9	2	3	3	5
L_266	B 6136-3-TB-0-1-5	Indica	Indonesia	5	9	4	3	4	4
L_267	BOHOTO BALOOCHESTAN	Basmati	Iran	5	9	1	3	5	7
L_268	CEA 3	Indica	Paraguay	7	9	4	5	4	5
L_269	ICTA CRISPO 38	Indica	Guatemala	6	9	3	3	4	5
L_270	IR 2003-P7-7-4-2	Indica	Philippines	10	11	6	7	5	6
L_271	IR 80310-12-B-1-3-B	Indica	Philippines	3	5	1	1	4	4
L_272	IRGA 370-38-1-1F-C4-2	Indica	Colombia	4	7	2	3	4	4
L_273	KHAU TRA BONG	Japonica	Vietnam	9	11	6	7	4	6
L_274	RD15	Indica	Thailand	11	11	11	9	7	7
L_275	SOM NGHE AN	admix	Vietnam	1	1	1	2	2	4
L_276	SURMATIYA	Japonica	India	2	5	2	3	4	5
L_277	TYPE 50	Indica	India	2	4	1	1	6	7
L_278	UPR 1201-1-20-1	Indica	India	6	8	2	3	4	6
L_279	IR 67518-B-11-1-B	Indica	Philippines	1	8	1	4	1	4
L_280	BANJANG	Japonica	Malaysia	10	11	8	9	3	4
L_281	BULI INIA	Basmati	Chile	6	7	2	3	4	4
L_282	JUMA 62	Indica	Dominican Republic	5	10	7	10	1	3
L_283	SAWAH	Japonica	Malaysia	11	11	7	9	4	5
L_284	SD120 SELN (CI 12320)	Indica	Haiti	8	11	2	4	4	5
L_285	SIGARDIS	Indica	Sri Lanka	9	11	6	7	5	7
L_286	CHANG LE SAN SHU ZAO	Indica	China	4	8	2	2	5	5
L_287	AI-ZI-HUNG	Indica	China	1	3	1	1	4	6
L_288	E-DAW HAWM	Indica	Thailand	9	11	4	5	5	6
L_289	E-LONG MAH	Indica	Thailand	8	10	1	4	4	4
L_290	SIMET 2	Indica	Indonesia	2	6	1	1	6	7
L_291	GOKULGANJA	Indica	India	8	11	4	6	4	7
L_292	KORR	Japonica	Liberia	9	11	3	7	3	5
L_293	LEUANG YAI 29-12-2	Indica	Thailand	3	6	2	3	4	5
L_294	MAKRO	Indica	India	4	9	1	3	3	5
L_295	TOURBE	Indica	Chad	8	11	4	4	5	6
L_296	MEKENZIE SMALL	Indica	Guyana	4	7	1	2	4	6
L_297	BALINGMI	Japonica	Bhutan	7	10	1	2	4	4
L_298	BAZAIL	Indica	Bangladesh	4	8	1	1	4	5
L_299	BERGREIS	Japonica	Austria	3	5	3	3	4	4
L_300	BLICCA	Japonica	Philippines	7	11	3	4	3	5
L_301	KOSAGI	Japonica	Guinea	9	11	5	5	4	5
L_302	PUILLIPINA KATARI	Indica	Bangladesh	3	8	2	1	5	7
L_303	TIMMURAY	Basmati	Bhutan	4	6	3	2	5	6
L_304	TUMBA	Indica	Indonesia	7	9	1	3	6	7
L_305	LIMBAYAN	Basmati	Malaysia	9	11	3	5	4	5
L_306	SOLOMON RED RICE	Indica	Solomon Islands	7	9	1	3	5	6
L_307	BAXIANG	Japonica	Vietnam	4	6	1	2	4	5
L_308	MALAIHONG	Indica	Malaysia	3	4	2	2	4	3
L_309	WUZILUOSI 215	Japonica	Soviet Union	3	5	3	3	3	3
L_310	LINGUO	Japonica	Italy	2	4	1	3	3	4
L_311	GAOLIQIU	Japonica	North Korea	3	4	3	2	5	6
L_312	Nabated A Smar	Japonica	Egypt	9	11	7	8	3	6
L_313	K 24	Indica	Uganda	1	4	1	2	3	5
L_314	QIUTIANXIAOTING	Japonica	Japan	2	5	2	3	4	5
L_315	CISOKAN	Indica	Indonesia	8	11	1	3	3	4
L_316	YR196	Japonica	Australia	3	6	1	2	2	3
L_317	TAIDONGLUDAO	Japonica	China	6	8	5	4	4	4
L_318	HUANGSIGUIZHAN	Indica	China	3	6	1	3	3	4
L_319	BAOXIE 123B	Indica	China	1	6	2	4	2	4
L_320	LONGHUAMAOHU	Japonica	China	3	4	1	2	3	3
L_321	LAOGUANGTOU 83	Japonica	China	2	4	3	2	4	3
L_322	MUXIQIU	Japonica	China	9	11	7	8	3	5
L_323	MINBEIWANXIAN	Indica	China	2	2	1	1	4	4
L_324	LUCAIHAO	Indica	China	6	8	2	3	6	7
L_325	XUANENCHANGTANQINGZHAN	Indica	China	2	2	1	1	4	4
L_326	BAWANGBIAN 1	Admix	China	2	3	1	2	5	5
L_327	HONGQI 5	Japonica	China	6	9	1	1	2	3
L_328	ZHONGNONG 4	Indica	China	7	10	2	3	4	4
L_329	HONGGU	Indica	China	3	7	1	3	1	3
L_330	XIAOHONGGU	Indica	China	3	7	1	2	3	4
L_331	ZINUO	Indica	China	1	2	2	2	3	3
L_332	JIABALA	Indica	India	2	4	2	2	4	4
L_333	WENXIANGNUO	Indica	China	2	4	1	2	3	3
L_334	SHUFENG 101	Indica	China	4	7	4	3	4	5
L_335	XIANGWANXIAN 3	Indica	China	3	5	2	2	3	5
L_336	AIZIZHAN	Indica	China	1	5	1	1	1	4
L_337	YUYANNUO	Japonica	China	6	5	1	1	3	2
L_338	BAIKEHANHE	Indica	China	2	3	2	2	4	4
L_339	XIANGAI B	Indica	China	7	10	3	3	4	5
L_340	MEIHUANUO	Indica	China	2	4	1	2	5	5
L_341	YELICANGHUA	Japonica	China	2	2	1	1	3	4
L_342	WEIGUO	Japonica	China	2	8	2	2	2	3
L_343	BR24	Indica	Bangladesh	2	5	1	2	3	3
L_344	C418	admix	China	5	7	2	3	2	3
L_345	FENGAIZHAN	Indica	China	9	10	3	3	5	4
L_346	YUEXIANGZHAN	Indica	China	9	10	3	3	4	4
L_347	Bg90-2	Indica	Sri Lanka	11	11	8	6	5	5
L_348	Gayabyeo	Indica	Korea	7	9	4	3	3	2
L_349	Hnankar	Indica	Myanmar	6	10	6	6	2	4
L_350	Dhan4	Indica	India	9	11	5	6	3	3
L_351	Pusa(Basmati 1)	Admix	India	11	11	2	3	3	2
L_352	Milagrosa, Zawa Banday	Basmati	Philippines	11	11	11	10	4	4
L_353	Basmati 385	Basmati	Pakistan	11	11	7	6	5	4
L_354	Q5	Indica	Vietnam	4	9	1	2	4	5
L_355	Chhomromg	Indica	Nepal	3	6	1	2	3	4
L_356	Govind	Indica	india	8	11	4	4	4	4
L_357	UPR 191-66	Indica	india	6	7	1	1	3	3
L_358	Tek Si Chut	Indica	Taiwan	6	9	1	3	3	4
L_359	Rubio	Admix	Peru	9	11	4	6	4	5
L_360	Sadri rice 1	Basmati	Iran	6	8	2	2	3	3
L_361	Ziri	Admix	India	9	11	2	7	1	3
L_362	TKM6	Indica	India	6	9	1	3	3	4
L_363	IAC3	Japonica	China	1	1	2	2	-	-
L_364	CAOZHAO-2	Indica	China	1	7	1	3	-	-
L_365	GAJALE	Indica	Nepal	2	4	3	3	-	-
L_366	AP423	Japonica	India	6	8	1	1	-	-
L_367	AI YEH LU	Japonica	China	6	9	2	3	-	-
L_368	SEBERANG	Indica	Philippines	2	6	1	3	-	-
L_369	CISADANE	Indica	India	2	8	2	3	-	-
L_370	FL478	Indica	Philippines	5	10	1	3	-	-
L_371	IRAT109	Japonica	Brazil	5	7	2	3	-	-
L_372	KASALATH	Aus	Japan	2	4	2	3	-	-
L_373	IR55419-04	Indica	Philippines	2	1	2	1	-	-
L_374	IR62266-42-6-2	Indica	Philippines	8	11	2	3	-	-
L_375	BW311-9	Indica	Philippines	1	5	1	1	-	-
L_376	IAC47	Japonica	Philippines	5	6	1	1	-	-
L_377	IR47686-6-2-1-1	Japonica	Philippines	9	11	7	5	-	-
L_378	2004	Indica	China	2	11	3	6	-	-
L_379	829	Indica	China	7	11	4	4	-	-
L_380	XUDAO 4	Japonica	China	5	4	4	1	-	-
L_381	IAC3	Japonica	China	3	6	1	2	3	3
L_382	MONOLAYA	Indica	The United States	4	9	1	3	3	4
L_383	NONA BOKRA	Indica	India	6	7	4	3	4	3
L_384	Maravilha	Admix	Brazil	6	9	3	4	3	4
L_385	LIJIANGXINTUANHEIGU	Japonica	China	4	8	3	4	3	4
L_386	NONGLINNUO	Japonica	China	6	8	1	3	3	4
L_387	D15	Indica	China	6	9	2	3	3	4
L_388	ZH5	Indica	China	6	8	3	2	3	3
L_389	BAOXUAN 21	Indica	China	5	9	1	3	1	3
L_390	JINCHUANYIHAO	Japonica	China	6	8	2	4	3	3
L_391	HUA 565	Indica	China	7	10	4	2	4	5
L_392	WANXIAN 763	Indica	China	5	11	1	3	3	5
L_393	053A-3	Japonica	China	3	5	1	2	2	2
L_394	42686	Indica	Africa	8	8	4	4	3	4
L_395	NERICA 8	Japonica	Africa	5	9	1	1	2	3
L_396	YANDAO 9	Japonica	China	6	7	4	4	4	4
L_397	Matatag2	Indica	Philippines	3	5	1	1	2	2
L_398	FUNINGZIPIGENGZI	Indica	China	3	5	2	1	2	2
L_399	GAOYANGDIANDAO DAHONGMANG	Japonica	China	4	11	2	3	2	3
L_400	SHUIYUAN 300LI	Japonica	China	8	7	4	4	3	3
L_401	XINGGUO	Japonica	China	1	2	1	1	1	1
L_402	HUANGKEZAOERSHI	Japonica	China	4	9	2	4	2	3
L_403	BAIGEDAO	Japonica	China	2	6	1	3	1	1
L_404	TIEGANWU	Japonica	China	5	7	1	4	2	3
L_405	LIUSHIZAO	Indica	China	3	4	2	3	3	3
L_406	QIUQIANBAI	Indica	China	2	5	1	2	3	3
L_407	LEIHUOZHAN	Indica	China	1	4	2	3	3	3
L_408	FEIDONGTANGDAO	Japonica	China	3	9	1	3	1	4
L_409	JINXIBAI	Indica	China	2	3	2	3	2	3
L_410	SANBAILI	Indica	China	7	7	4	3	4	4
L_411	TAISHANNUO	Indica	China	1	3	1	1	1	1
L_412	AIHECHI	Indica	China	2	5	2	3	2	3
L_413	AIMI	Indica	China	2	3	1	1	1	1
L_414	HONGMISANDAN	Japonica	China	7	9	1	4	1	3
L_415	JINBAOYIN	Indica	China	1	2	1	1	1	2
L_416	WUKEZHAN	Indica	China	3	4	3	1	3	3
L_417	YIZHIXIANG	Japonica	China	2	1	2	2	3	4
L_418	YANSHUICHI	Indica	China	2	4	2	2	5	6
L_419	SHUYAZHAN	Indica	China	2	5	1	2	4	6
L_420	ESINIU	Indica	China	3	6	2	2	4	5
L_421	HEIDU 4	Indica	China	2	4	1	2	4	4
L_422	XISHI 15	Japonica	China	3	6	1	3	2	4
L_423	HONGGENGHANGU	Indica	China	3	4	2	2	4	4
L_424	HONGAINUO	Indica	China	2	2	1	1	3	3
L_425	QIYUEXIAN	Indica	China	3	4	1	1	4	4
L_426	GUANGKEXIANGNUO	Japonica	China	2	4	1	3	4	5
L_427	DONGTINGWANXIAN	Indica	China	2	3	2	1	5	5
L_428	DONG DU	Indica	China	3	5	2	3	4	5
L_429	LIUYENIAN	Indica	China	6	9	3	4	3	5
L_430	BA BAI GU	Indica	China	1	3	1	2	4	5
L_431	XUGUNUO	Indica	China	2	2	2	1	3	4
L_432	MUGUANUO	Admix	China	5	9	3	3	4	5
L_433	WANLIXIAN	Indica	China	2	2	1	2	5	5
L_434	MAMAGU	Indica	China	2	1	1	1	3	3
L_435	HEI MI CHAN	Indica	The United States	3	5	2	2	2	2
L_436	SANKECUN	Indica	China	3	6	1	3	1	2
L_437	SHANJIUGU	Japonica	China	9	10	3	3	4	4
L_438	HAOMAKE (K)	Japonica	China	6	6	5	5	4	3
L_439	DAWANNUO	Indica	China	5	6	5	3	4	3
L_440	ZIMI	Indica	China	7	11	4	5	3	5
L_441	XIANG CHANG ZAO	Indica	China	2	3	2	1	3	3
L_442	WUZIDUI	Japonica	China	2	4	2	1	1	2
L_443	LAOZAOGU	Indica	China	3	3	2	3	2	2
L_444	GONGJU 73	Indica	China	3	5	1	1	1	2
L_445	LENGSHUIGU 2	Japonica	China	6	9	1	3	2	3
L_446	LAMUJIA	Japonica	China	7	9	2	2	3	4
L_447	QITOUGU	Indica	China	3	4	1	1	3	3
L_448	HUANGPINUO	Japonica	China	1	4	1	1	1	2
L_449	HAOXIANG	Indica	China	3	5	3	2	3	3
L_450	HAOHUANGLA	Indica	China	7	8	5	3	4	3
L_451	NANGAOGU	Indica	China	6	7	4	3	4	3
L_452	JIXUENUO	Indica	China	2	4	2	2	5	5
L_453	FANHAOPI	Indica	China	2	4	1	1	4	4
L_454	BEIZINUO	Indica	China	9	11	2	4	3	5
L_455	MAGUNUO	Japonica	China	7	6	3	3	3	3
L_456	XIANGNUO	Japonica	China	5	6	2	3	2	2
L_457	NIANKENUO	Indica	China	7	11	4	3	4	5
L_458	MAWEINIAN	Indica	China	1	2	1	2	5	6
L_459	HONGKEZHENUO	Japonica	China	5	9	1	3	1	3
L_460	ZIMANGFEIE	Japonica	China	9	10	1	2	4	4
L_461	YOUNIAN	Indica	China	1	1	1	1	2	4
L_462	GUANTUIBAIHE 1	Japonica	China	1	6	1	3	3	5
L_463	YANGKENUO	Japonica	China	7	9	3	3	4	4
L_464	HAOLVGUANGNIAN	Japonica	China	9	11	2	4	4	4
L_465	XIAOBAIMI	Indica	China	6	7	1	3	1	4
L_466	MAGUZI	Japonica	China	8	9	5	4	4	4
L_467	TAIZHONGXIANXUAN 2	Indica	China	7	9	2	4	4	6
L_468	MENJIAGAO 1	Indica	China	1	6	1	3	2	4
L_469	JINNANTE B	Indica	China	4	6	1	3	4	5
L_470	ZHUZHEN B	Indica	China	2	3	1	3	3	2
L_471	CHAOYANGYIHAO B	Indica	China	2	3	2	3	4	5
L_472	L 301B	Indica	China	2	3	3	2	5	4
L_473	ANNONGWANGENG B	Japonica	China	3	6	3	3	4	5
L_474	ZAOSHUNONGHU 6	Japonica	China	2	5	2	3	3	4
L_475	QINGSIAI 16B	Indica	China	2	4	1	2	2	3
L_476	JINGHU B	Indica	China	3	5	2	2	4	4
L_477	LIMING B	Japonica	China	5	5	3	3	4	3
L_478	DIANRUI 409B	Indica	China	4	4	3	3	4	3
L_479	80B	Indica	Philippines	6	6	4	3	4	2
L_480	BAOXIE-7B	Indica	China	4	7	3	3	3	3
L_481	ZHENGSHAN97	Indica	China	2	4	2	2	2	2
L_482	88B	Indica	China	6	10	4	4	3	5
L_483	GU 154	Indica	China	8	9	3	4	5	5
L_484	GUI 630	Indica	China	10	11	7	7	4	7
L_485	IR661-1	Indica	China	3	5	3	1	3	3
L_486	PEI C122	Indica	China	6	7	5	4	5	5
L_487	GENG 7623	Admix	China	5	8	6	5	5	6
L_488	76--1	Japonica	China	2	3	1	1	3	2
L_489	HUHUI 628	Japonica	China	8	11	8	8	3	4
L_490	TEQINGXUANHUI	Indica	China	5	9	1	4	2	5
L_491	XIANGHUI91269	Indica	China	7	10	5	5	4	5
L_492	JWR 221	Indica	China	6	10	3	4	3	4
L_493	GUANGLUAI 4	Indica	China	5	7	1	2	2	3
L_494	AIJIAONANTE	Indica	China	3	6	2	2	3	3
L_495	LIUSHA 1	Indica	China	3	5	2	1	2	2
L_496	ERJIUNAN 1	Indica	China	6	9	1	3	3	4
L_497	NANJING 11	Indica	China	1	4	1	1	1	2
L_498	SUGENG 2	Japonica	China	5	5	4	3	2	2
L_499	CHENGDUAI 3	Indica	China	3	7	1	3	2	4
L_500	AIMAKANG	Indica	China	8	10	3	3	4	4
L_501	LIXINGENG	Japonica	China	9	11	9	9	5	5
L_502	HEIGENG 2	Japonica	China	8	10	3	3	4	4
L_503	GUIZHAO 2	Indica	China	10	11	7	5	5	4
L_504	ERGANGAI	Indica	China	5	6	3	3	5	4
L_505	YUELIANGGU	Indica	China	2	1	2	1	3	4
L_506	GUANGLUAI 15-1	Indica	China	2	5	1	3	5	6
L_507	HONGWAN 1	Indica	China	3	4	1	3	6	5
L_508	XIANGAIZAO 10HAO	Indica	China	3	5	1	1	2	3
L_509	XIANGWANXIAN 1	Indica	China	4	5	3	1	5	6
L_510	NANTEHAO	Indica	China	5	5	2	2	3	3
L_511	XIUSHUI 115	Japonica	China	8	9	3	4	4	5
L_512	LUKE 3	Indica	China	6	8	2	3	3	4
L_513	AITUOGU 151	Indica	China	1	2	1	2	4	6
L_514	JINDAO 1	Japonica	China	7	10	1	4	5	6
L_515	LIAOGENG 287	Japonica	China	2	4	1	1	2	2
L_516	YUN HUI 72	Indica	China	5	8	2	3	5	7
L_517	ZAOSHUXIANGHEIMI	Indica	China	9	11	7	6	6	7
L_518	MOMI	Indica	China	2	2	2	2	4	5
L_519	JINYOU 1	Indica	China	5	8	2	3	4	6
L_520	XIANGZAOXIAN 7	Indica	China	4	5	3	2	4	4
L_521	ZHENXIAN 232	Indica	China	3	3	1	1	3	3
L_522	ZAOXIAN 240	Indica	China	2	3	2	2	4	4
L_523	DANGYU 5	Indica	China	8	9	2	4	4	4
L_524	CHENGNONGSHUIJING	Indica	China	8	9	3	3	5	5
L_525	ZHENGDAO 5	Japonica	China	6	9	2	3	4	5
L_526	SIBEITIZHAO 6	Indica	China	10	11	8	7	5	6
L_527	ZHONGHUA 11	Japonica	China	7	8	8	5	6	4
L_528	XS63	Japonica	China	6	6	6	4	3	3
L_529	HANDAO 297	Japonica	China	9	11	8	8	5	7
L_530	NANJING 6	Indica	China	2	2	2	2	4	5
L_531	TEQING	Indica	China	7	10	2	3	4	5
L_532	HANDAO 65	Japonica	China	4	4	3	3	3	2
L_533	ZF-802	Indica	China	7	10	3	5	3	5
L_534	DonJin	Japonica	China	2	9	1	3	1	3
L_535	LONGTEPU	Indica	China	6	7	3	3	3	3
L_536	Bala	Indica	China	6	8	2	4	2	4
L_537	Pokkali	Indica	China	3	8	2	4	2	3
L_538	AZUCENA	Japonica	Philippines	8	11	6	8	4	6
L_539	Cabacu	Japonica	China	7	9	2	4	4	5
L_540	IRAT109	Japonica	China	8	10	3	5	4	5
L_541	IRAT12	Japonica	China	11	11	9	10	5	6
