# Supplementary material for: Genome-wide association studies identified OsTMF as a gene regulating rice seed germination under salt stress
Source: Front Plant Sci. 2024 Mar 27;15:1384246. doi: 10.3389/fpls.2024.1384246 (PMC11004275; doi:10.3389/fpls.2024.1384246)
Supplement: Supplementary file 5 [file Table_2.xlsx]

## Sheet: Table S2
Table S2 A list of 50 rice varieties used for determining the optimal salt stress conditions for seed germination assays.
Variety ID	Variety name	Subpopulations	Countries of origins	Germination rate grades on the 3rd day (GRG3)								Germination rate grades on the 4th day (GRG4)								Germination index grades
				0.3% NaCl	0.4% NaCl	0.5% NaCl	0.6% NaCl	0.7% NaCl	0.8% NaCl	0.9% NaCl	1.0% NaCl	0.3% NaCl	0.4% NaCl	0.5% NaCl	0.6% NaCl	0.7% NaCl	0.8% NaCl	0.9% NaCl	1.0% NaCl	0.3% NaCl	0.4% NaCl	0.5% NaCl	0.6% NaCl	0.7% NaCl	0.8% NaCl	0.9% NaCl	1.0% NaCl
L_015	AUS 278	Aus	Bangladesh	5	5	8	9	9	9	10	10	2	2	3	3	4	4	6	5	4	4	5	6	6	7	8	9
L_022	CHAN KU	Indica	China	2	1	2	2	4	4	4	4	2	2	1	2	3	4	4	6	3	3	3	4	4	5	6	6
L_023	CHAO DO	Indica	Laos	5	5	7	6	6	7	8	9	1	2	2	3	3	4	6	6	4	4	4	5	5	6	6	7
L_031	DU GEN CHUAN	Indica	China	3	5	6	7	7	9	9	9	2	2	2	3	4	5	5	6	3	4	4	4	5	5	7	9
L_033	Ea tom	Indica	Laos	8	8	10	10	10	11	11	11	1	2	3	3	4	5	5	7	4	5	5	6	6	7	8	9
L_035	GAO LIANG ZAO	Indica	China	2	1	2	2	2	2	3	4	2	2	2	3	3	5	6	7	4	4	4	5	6	6	7	7
L_038	HEI YAN ZHAN	Indica	China	3	3	4	5	5	7	7	8	2	2	2	3	3	5	6	7	3	3	2	4	4	5	6	7
L_044	JUAN YE LAI	Japonica	China	5	5	5	5	5	7	8	9	3	2	2	3	4	4	5	6	4	3	3	4	4	5	5	7
L_047	KAYELI KUNING	Japonica	Indonesia	10	10	11	11	11	11	11	11	9	8	8	10	10	11	11	11	6	6	7	7	8	8	9	9
L_054	LWANKHAN	Indica	Myanmar	10	10	11	11	11	11	11	11	6	6	5	7	7	7	9	9	4	5	4	5	6	6	6	7
L_059	NCS603 B	Indica	India	4	6	11	10	10	10	11	11	5	5	8	7	8	8	9	9	1	3	4	4	4	5	5	6
L_065	P 41	Basmati	Liberia	11	11	11	11	11	11	11	11	11	10	10	11	11	11	11	11	3	3	4	4	5	7	9	10
L_085	VUOTTA SAIL	Indica	Bangladesh	4	5	7	6	7	7	9	9	2	2	3	3	5	5	6	7	2	3	3	4	5	5	6	7
L_105	BUCHI	Basmati	India	4	7	9	8	8	8	10	10	1	2	1	2	3	4	5	6	2	3	3	4	4	5	6	7
L_112	EA DAM HANG DOK	Indica	Laos	9	9	11	10	11	11	11	11	5	5	6	7	7	9	9	10	4	5	6	6	7	8	9	9
L_122	MAUNG NYO	Indica	Myanmar	9	9	11	11	11	11	11	11	6	6	9	9	10	10	11	11	4	5	5	6	6	6	7	7
L_125	PAIRJAT	Indica	Bangladesh	9	9	8	9	9	10	10	11	5	5	5	6	7	9	9	9	4	3	3	4	4	5	7	6
L_147	E-NOI NAH	Indica	Thailand	11	9	9	10	10	11	11	11	4	3	3	4	5	5	6	6	5	5	5	6	7	7	8	10
L_151	HIRA NAKHI	Indica	India	6	7	7	8	8	9	10	10	6	5	3	5	5	7	7	8	4	3	2	4	4	5	5	6
L_166	PADI RENDAH	Japonica	Indonesia	11	10	11	11	11	11	11	11	5	6	8	7	8	9	9	11	3	4	4	4	5	6	6	7
L_169	TAM	Indica	Laos	11	10	11	10	11	11	11	11	9	9	10	10	11	11	11	11	5	5	5	6	7	8	8	9
L_177	PAGAIYAHAN	Indica	Taiwan	7	8	11	10	11	11	11	11	6	6	7	7	8	8	10	9	6	7	8	9	9	9	10	10
L_221	RIKUTO NORIN MOCHI 20	Japonica	Japan	7	6	8	8	8	9	9	11	6	4	4	5	6	7	7	9	4	4	4	5	5	6	7	7
L_222	EGYPTIAN	Japonica	Turkey	7	6	9	9	9	11	11	11	4	4	4	5	6	6	7	7	4	4	4	5	6	6	6	7
L_227	ARC 18112	Indica	India	2	2	3	3	3	5	6	7	2	2	3	4	4	5	6	6	2	3	2	2	3	5	5	6
L_230	BLUE BELLE	Japonica	The United States	7	7	9	8	9	9	9	9	2	4	4	5	6	7	7	8	3	3	3	4	4	5	7	9
L_237	FACAGRO 64	Indica	Burundi	1	1	1	2	2	3	3	3	1	1	1	2	2	4	4	5	1	1	2	2	3	3	5	5
M-1257	GALWAKA HANDERAN	Indica	Sri Lanka	11	11	11	11	11	11	11	11	10	10	9	10	11	11	11	11	5	5	5	6	7	7	8	9
L_244	LABRA	Indica	India	4	5	6	5	7	7	7	7	3	3	3	3	5	6	6	7	4	4	5	5	6	6	7	7
L_250	NCS194	Indica	India	2	2	3	5	4	7	7	7	2	2	1	3	3	3	5	5	5	5	5	6	7	8	9	9
L_251	NONG KE	Japonica	China	4	5	4	5	5	5	7	7	2	2	1	2	3	4	4	4	4	4	4	5	5	7	9	9
L_267	BOHOTO BALOOCHESTAN	Basmati	Iran	5	6	9	9	9	10	11	11	1	2	3	4	4	4	5	6	5	5	7	7	7	9	10	10
L_274	RD15	Indica	Thailand	11	11	11	11	11	11	11	11	11	10	9	10	10	11	11	11	7	7	7	8	8	9	10	10
L_275	SOM NGHE AN	Admix	Vietnam	1	1	1	1	2	2	3	4	1	1	2	2	3	4	5	5	2	3	4	4	5	5	6	7
L_278	UPR 1201-1-20-1	Indica	India	6	7	8	7	8	9	11	11	2	2	3	4	4	5	5	7	4	5	6	7	7	8	9	10
L_281	BULI INIA	Basmati	Chile	6	7	7	7	7	7	9	9	2	2	3	3	4	5	6	7	4	5	4	5	5	6	6	7
L_291	GOKULGANJA	Indica	India	8	9	11	9	10	11	11	11	4	5	6	6	6	7	8	9	4	4	7	6	7	8	9	10
L_317	TAIDONGLUDAO	Japonica	China	6	7	8	8	8	8	10	10	5	4	4	5	7	6	7	8	4	4	4	5	5	7	7	9
L_324	LUCAIHAO	Indica	China	6	7	8	7	7	9	10	10	2	4	3	4	5	6	6	7	6	7	7	8	8	9	10	10
L_403	BAIGEDAO	Japonica	China	2	3	6	5	7	7	8	8	1	2	3	3	4	4	5	6	1	1	1	2	3	3	5	6
L_433	WANLIXIAN	Indica	China	2	1	2	3	3	3	4	4	1	2	2	2	3	5	5	5	5	5	5	6	7	7	8	9
L_439	DAWANNUO	Indica	China	5	6	6	7	7	9	9	9	5	4	3	4	4	5	5	6	4	3	3	4	4	5	5	6
L_445	LENGSHUIGU 2	Japonica	China	6	7	9	9	9	9	10	10	1	2	3	3	3	4	5	6	2	3	3	4	5	5	5	7
L_451	NANGAOGU	Indica	China	6	7	7	7	8	7	9	10	4	4	3	5	5	7	7	7	4	3	3	4	5	7	7	9
L_465	XIAOBAIMI	Indica	China	6	7	7	8	9	9	9	9	1	2	3	3	4	4	5	6	1	3	4	4	4	5	6	6
L_511	XIUSHUI 115	Japonica	China	8	8	9	9	9	9	11	11	3	4	4	5	6	7	8	8	4	5	5	6	6	7	8	9
L_517	ZAOSHUXIANGHEIMI	Indica	China	9	10	11	10	10	11	11	11	7	6	6	7	8	8	9	9	6	7	7	9	9	9	10	10
L_519	JINYOU 1	Indica	China	5	6	8	7	8	8	8	10	2	2	3	3	4	4	5	6	4	5	6	6	7	7	8	9
L_523	DANGYU 5	Indica	China	8	8	9	8	9	9	10	10	2	4	4	3	5	5	7	7	4	4	4	5	5	7	8	9
L_526	SIBEITIZHAO 6	Indica	China	10	10	11	11	11	11	11	11	8	7	7	8	9	9	10	10	5	5	6	6	7	7	9	9
