# Supplementary material for: Genome-wide association studies identified OsTMF as a gene regulating rice seed germination under salt stress
Source: Front Plant Sci. 2024 Mar 27;15:1384246. doi: 10.3389/fpls.2024.1384246 (PMC11004275; doi:10.3389/fpls.2024.1384246)
Supplement: Supplementary file 6 [file Table_3.xlsx]

## Sheet: Table S3
Table S3 Grades classifications of seed germination under salt stresses.
Grades	Relative values
1	0.9501-1.0000
2	0.9001-0.9500
3	0.8001-0.9000
4	0.7001-0.8000
5	0.6001-0.7000
6	0.5001-0.6000
7	0.4001-0.5000
8	0.3001-0.4000
9	0.2001-0.3000
10	0.1001-0.2000
11	0-0.1000
