# Supplementary material for: Genome-wide association studies identified OsTMF as a gene regulating rice seed germination under salt stress
Source: Front Plant Sci. 2024 Mar 27;15:1384246. doi: 10.3389/fpls.2024.1384246 (PMC11004275; doi:10.3389/fpls.2024.1384246)
Supplement: Supplementary file 7 [file Table_4.xlsx]

## Sheet: Table S4
Table S4 Primers used in this study.
Gene accession	Forward primers (5'-3')	Reverse primers (5'-3')	Product length (bp)
OsActin1	CTTCATAGGAATGGAAGCTGCGGGTA	CGACCACCTTGATCTTCATGCTGCTA	196
LOC_Os03g29310	GGGCCCGTAGATTCAGAGTG	CAACTCAGCATCAGTCGGGT	138
LOC_Os03g29350	GTGTCTCTGGAAGCTTGCCT	GGAAGCATGCAAGGAAAGCC	216
LOC_Os03g29360	GAAGTGGAGGAGGAGGAGGA	CACAGCCCGCAGATCCAC	146
LOC_Os03g29410	CAGGGAGCAGCATCTAGTCG	TTGAGGAGGGGCTCTAGGTC	207
LOC_Os03g29430	AGAACCCAACGGAGCAACAA	CCTCATTCGCGAGTGATGGA	129
LOC_Os03g29460	TGTTCGACAAGTACCACCCG	AACTGGGTGACGTCGATGAC	178
LOC_Os03g29470	ACCTGGCTCAATTCCTCTGC	GAGGTTGGAGTAGGGTTGGC	138
LOC_Os03g29480	GGTTCGAGGAGTCCATGTCC	GCTCCCAATGTCATCCTGCT	134
LOC_Os03g29520	GCCCAAGCCAAAAGACAAGG	GCCATGAAGAGACGCTCCTT	93
LOC_Os03g29540	TAGCTTTGCAAGGCCGATCA	GGGAACAGAACGATGGGGAT	240
LOC_Os03g29570	ACAGGTGGGCTGATGGAATG	TGGCCTCATCATCAAGCTGG	108
LOC_Os03g29614	TGTCCTACATCGCCAAGCAC	AGAGTGTGGAGCCTGAGGAT	175
LOC_Os03g29630	GGACCATGCTGTGCTGAGAA	ACCCATTCTGCTGCAAAGGA	131
LOC_Os03g29650	TCATTCACCGGATCGCTACG	GACTGCGAGACCATAGACGG	163
LOC_Os03g29680	CAACCAGAACCACGAGTCCA	CGGCGGATGTTGTTGTTGAG	84
LOC_Os03g29730	AGGATGGGAGTGCTGAGGAT	CCAACCATGCACTCCACGTA	205
LOC_Os03g29740	GCTCCGTGGATTCGATCAGT	CCCTGACAACCACCATTCCA	98
LOC_Os03g29750	GCACCCATTGACTGAGGACA	GATGCTGGGGTTGAGGTGAA	113
LOC_Os03g29760	GGACAACACACCTCACCACA	ACCGACTTAGTGCCATGGTC	92
LOC_Os05g48590	GAGACAGGCTGACTGATGGT	ACCTCTCATGATCCGCAGTT	155
LOC_Os05g48600	CGGCCACAACAAGCGTATTA	TTCCTGCAGATGAGATGCCT	161
LOC_Os05g48620	ACGATTGAGGAGTTGAGGCA	AGTGGTCTGGTGGATTCAGG	164
LOC_Os05g48650	GTCAGCTCGGGCAACCTC	CGACAGCCCGTCCTCCTC	96
LOC_Os05g48670	GGCCCTAAGGACTTCCCAAT	TCTAGCGGCCATGAGAAACT	123
LOC_Os05g48680	ATGGCTGCTTCGCATTTCAT	ATCTCCAGCAACTTCAGCCT	101
LOC_Os05g48700	AGATCATCTCCGTGCTCAGG	ACCTCCCATTCGTCAACACT	159
LOC_Os05g48730	ACGACGCTGATGTGCATAAT	CTCCCTCCCTTCCCATTGC	84
LOC_Os05g48760	CTTGTTCTGCAGCAACTGGT	TGCAGGTTGAAATGGTTGGG	135
LOC_Os05g48770	TGAACTAGCTGGCGGTACAT	ATTGTAAGTCTCCCGCTGCT	100
LOC_Os05g48790	GTCCAACGTTCCCAAGTAGC	CTATGGGCTCCTCGTAAGCA	111
LOC_Os05g48800	GCTCAGCCATGGGATTCAAG	AGTAGTGAGCAGCAGGTCTT	114
LOC_Os05g48810	CGTCGTGACGCAGAAGATAC	GTTGATGACGGAGGTGATCG	109
LOC_Os05g48850	ACCAGGAGCTTCTTGAGCAT	GGGTGTAGCAGATGCCATTC	117
LOC_Os05g48860	CAAGGTGGAGGAAGGGATGT	AGGTCGCACAAGTGTAATGC	96
LOC_Os05g48870	GCTTGTTGCCAAGGATTTGC	TGCACTCCAACCTGTGGTTA	97
LOC_Os05g48880	GCTGATCGAGGCTGAGGTTA	TCCTGTTCATCACCAGGCAT	138
LOC_Os05g48890	GTTCAGCAGCCTCAAGCC	GAAGGCGTCCATGGAGTAGA	106
LOC_Os05g48900	GCTGATGGACAGCTACAACG	CATCAGCTGGATCTGGTCCT	115
LOC_Os05g48930	GAGGAGGAGGAGGTGAGGAG	CTTCACGACGTGGCTCAG	97
LOC_Os05g48960	GCCGACAATTGTGCTTGCTA	CCTCAAAGTGCTCCTGCATC	110
