# Supplementary material for: Genome-wide association studies identified OsTMF as a gene regulating rice seed germination under salt stress
Source: Front Plant Sci. 2024 Mar 27;15:1384246. doi: 10.3389/fpls.2024.1384246 (PMC11004275; doi:10.3389/fpls.2024.1384246)
Supplement: Supplementary file 8 [file Table_5.xlsx]

## Sheet: Table S5
Table S5 Mutants generated for candidate genes, using CRISPR/Cas9-based gene editing.
Gene ID	Guide sequence (5'-3')	Mutation types (5'-3')		Transgenic element in mutants
LOC_Os05g48600	TGGTGTCCAGTCGAAGGAACACCGGGGGAATCCAGCGGGA	#1 (-4 bp)	TGGTGTCCAGTCGAAGG----CCGGGGGAATCCAGCGGGA	None
		#2 (-5 bp)	TGGTGTCCAGTCGAA-----ACCGGGGGAATCCAGCGGGA	None
		#3 (-2 bp)	TGGTGTCCAGTCGAAGGAAC--CGGGGGAATCCAGCGGGA	None
LOC_Os05g48620	GACAGGAGTACCTGGCAATTAAGGAGGAGGCGGCAATGCA	#1 (+1 bp)	GACAGGAGTACCTGGCAATTAAAGGAGGAGGCGGCAATGCA	None
		#2 (-1 bp)	GACAGGAGTACCTGGCAAT-AAGGAGGAGGCGGCAATGCA	None
LOC_Os05g48650	GCGGGGGCTGCGGCGCGAGCTCCGGGCGGCCCGGTGGGCG	#1 (-1 bp)	GCGGGGGCTGCGGCGCGAGCT-CGGGCGGCCCGGTGGGCG	None
		#2 (-8 bp)	GGGGGCTGCGGCG--------GGGCGGCCCGGTGGGCGGA	None
		#3 (-25 bp)	-------------------------GGCCCGGTGGGCGGA	None
LOC_Os05g48670	GCACGACACGAGGTCCTTCCGCGCGGGCCACCGCTCGCCC	#1 (+1 bp)	GCACGACACGAGGTCCTTCCAGCGCGGGCCACCGCTCGCCC	None
		#2 (-5 bp)	GCACGACACGAGGTC-----GCGCGGGCCACCGCTCGCCC	None
		#3 (-10 bp)	GCACGACACGAGGTC----------GGCCACCGCTCGCCC	None
LOC_Os05g48730	TGATGCTGAGGGTCTGGACCGCCGGGGCTCCGCCTCTTAG	#1 (-1 bp)	TGATGCTGAGGGTCTGGACC-CCGGGGCTCCGCCTCTTAG	None
		#2 (-2 bp)	TGATGCTGAGGGTCTGGACC--CGGGGCTCCGCCTCTTAG	None
LOC_Os05g48760	GAGTGGAAGCGAAGAGAGGGAAGAGGGAAGAGGAAGAGGA	#1 (-1 bp)	GAGTGGAAGCGAAGAGAGGG-AGAGGGAAGAGGAAGAGGA	None
		#2 (-5 bp)	GAGTGGAAGCGAAGAGAGG-----GGGAAGAGGAAGAGGA	None
LOC_Os05g48900	TCCGGCTCCTCCACGAGAGCCGGGTGGACACCCAGATCAA	#1 (+1 bp)	TCCGGCTCCTCCACGAGAGCCCGGGTGGACACCCAGATCAA	None
		#2 (-1 bp)	TCCGGCTCCTCCACGAGAG-CGGGTGGACACCCAGATCAA	None
		#3 (-5 bp)	TCCGGCTCCTCCACGAG-----GGTGGACACCCAGATCAA	None
LOC_Os05g48930	ATCCCGTACAACGCGAACCGGGCTTGGCCGGCGGCGAGCC	#1 (+1 bp)	ATCCCGTACAACGCGAACCGGAGCTTGGCCGGCGGCGAGCC	None
		#2 (-1 bp)	ATCCCGTACAACGCGAACCGG-CTTGGCCGGCGGCGAGCC	None
		#3 (-2 bp)	ATCCCGTACAACGCGAACCG--CTTGGCCGGCGGCGAGCC	None
The guide sequence is underlined, PAM (protospacer adjacent motif) sequence is in blue, and mutations are in red.
