# Supplementary material for: Genome-wide association studies identified OsTMF as a gene regulating rice seed germination under salt stress
Source: Front Plant Sci. 2024 Mar 27;15:1384246. doi: 10.3389/fpls.2024.1384246 (PMC11004275; doi:10.3389/fpls.2024.1384246)
Supplement: Supplementary file 9 [file Table_6.xlsx]

## Sheet: Table S6
Table S6 Correlation analysis of seed germination under salt stress.
Trait-treatments	GRG3-0.3% NaCl	GRG4-0.3% NaCl	GIG-0.3% NaCl	GRG3-0.5% NaCl	GRG4-0.5% NaCl	GIG-0.5% NaCl
GRG3-0.3% NaCl	1
GRG4-0.3% NaCl	0.3911	1
GIG-0.3% NaCl	0.1319	0.1155	1
GRG3-0.5% NaCl	0.6848	0.2286	0.03028	1
GRG4-0.5% NaCl	0.446	0.6191	0.02975	0.4362	1
GIG-0.5% NaCl	0.1108	0.07439	0.4705	0.1582	0.1366	1
