# Supplementary material for: Genome-wide association studies identified OsTMF as a gene regulating rice seed germination under salt stress
Source: Front Plant Sci. 2024 Mar 27;15:1384246. doi: 10.3389/fpls.2024.1384246 (PMC11004275; doi:10.3389/fpls.2024.1384246)
Supplement: Supplementary file 10 [file Table_7.xlsx]

## Sheet: Table S7
Table S7 SNPs used in this study, and their distributions on chromosomes.
Chromosome	Number of SNPs	Length of chromosome (Mb)	SNP density (SNPs/Mb)
1	35215	43.27	813.86
2	29213	35.94	812.92
3	29895	36.41	821
4	27247	35.5	767.48
5	24010	29.96	801.49
6	25394	31.25	812.69
7	23989	29.7	807.78
8	23281	28.44	818.55
9	18882	23	820.84
10	19442	23.21	837.81
11	24157	29.02	832.44
12	22175	27.53	805.48
