# Supplementary material for: Genome-wide association studies identified OsTMF as a gene regulating rice seed germination under salt stress
Source: Front Plant Sci. 2024 Mar 27;15:1384246. doi: 10.3389/fpls.2024.1384246 (PMC11004275; doi:10.3389/fpls.2024.1384246)
Supplement: Supplementary file 11 [file Table_8.xlsx]

## Sheet: Table S8
Table S8 Results of GWAS, based on the GLM model.
Traits	Treatments	SNPs	Chromosomes	Base position	p value	R2 (%)
GRG3	0.3% NaCl	S01_601216	1	601216	1.54703e-07	5.13064
GRG3	0.3% NaCl	S01_720950	1	720950	1.55568e-07	5.12887
GRG3	0.3% NaCl	S01_740034	1	740034	1.47939e-07	5.14484
GRG3	0.3% NaCl	S01_767727	1	767727	1.27381e-07	4.57543
GRG3	0.3% NaCl	S01_5248887	1	5248887	1.62664e-08	5.84317
GRG3	0.3% NaCl	S01_5494532	1	5494532	6.92141e-08	5.38577
GRG3	0.3% NaCl	S01_5521255	1	5521255	5.20052e-08	5.47626
GRG3	0.3% NaCl	S01_8119784	1	8119784	1.14362e-08	5.31886
GRG3	0.3% NaCl	S01_39044100	1	39044100	3.75321e-08	5.57938
GRG3	0.3% NaCl	S01_39045140	1	39045140	6.64219e-08	5.39881
GRG3	0.3% NaCl	S01_40843803	1	40843803	9.89584e-08	5.27246
GRG3	0.3% NaCl	S02_9671939	2	9671939	3.76553e-08	5.57834
GRG3	0.3% NaCl	S02_12155306	2	12155306	1.25554e-07	4.57989
GRG3	0.3% NaCl	S02_12156308	2	12156308	3.3858e-08	4.98449
GRG3	0.3% NaCl	S02_12157324	2	12157324	2.95182e-09	5.73505
GRG3	0.3% NaCl	S02_12162899	2	12162899	3.31255e-08	4.99124
GRG3	0.3% NaCl	S02_16789426	2	16789426	5.03897e-09	5.57086
GRG3	0.3% NaCl	S02_33920645	2	33920645	1.40972e-07	5.16016
GRG3	0.3% NaCl	S02_33924072	2	33924072	1.44794e-07	5.15167
GRG3	0.3% NaCl	S03_3767819	3	3767819	7.68213e-09	6.07917
GRG3	0.3% NaCl	S03_3774019	3	3774019	1.44841e-07	5.15156
GRG3	0.3% NaCl	S03_3777726	3	3777726	2.3832e-08	5.72278
GRG3	0.3% NaCl	S03_3778745	3	3778745	2.34579e-08	5.72777
GRG3	0.3% NaCl	S03_3791714	3	3791714	1.51129e-07	5.13807
GRG3	0.3% NaCl	S03_3810624	3	3810624	3.20088e-09	6.35373
GRG3	0.3% NaCl	S03_3811629	3	3811629	6.1794e-08	5.42167
GRG3	0.3% NaCl	S03_4898113	3	4898113	9.56709e-09	6.01021
GRG3	0.3% NaCl	S03_12015335	3	12015335	2.12712e-11	7.90896
GRG3	0.3% NaCl	S03_16666490	3	16666490	1.462e-07	5.1486
GRG3	0.3% NaCl	S03_16667599	3	16667599	7.27866e-08	5.36982
GRG3	0.3% NaCl	S03_16668618	3	16668618	8.64949e-08	5.31514
GRG3	0.3% NaCl	S03_16669731	3	16669731	1.92011e-08	5.79091
GRG3	0.3% NaCl	S03_16670753	3	16670753	3.71452e-08	5.58265
GRG3	0.3% NaCl	S03_16676240	3	16676240	1.38073e-07	5.16676
GRG3	0.3% NaCl	S03_16682467	3	16682467	8.34752e-09	6.05307
GRG3	0.3% NaCl	S03_16683467	3	16683467	3.65623e-10	7.03029
GRG3	0.3% NaCl	S03_16687589	3	16687589	2.53596e-08	5.70317
GRG3	0.3% NaCl	S03_16688630	3	16688630	7.82034e-08	5.34708
GRG3	0.3% NaCl	S03_16689717	3	16689717	2.71136e-08	5.68207
GRG3	0.3% NaCl	S03_16693989	3	16693989	3.70369e-09	6.30803
GRG3	0.3% NaCl	S03_16694993	3	16694993	5.4805e-08	5.45966
GRG3	0.3% NaCl	S03_16696465	3	16696465	3.05798e-09	6.36803
GRG3	0.3% NaCl	S03_16697605	3	16697605	9.40344e-09	6.01563
GRG3	0.3% NaCl	S03_16699913	3	16699913	2.02443e-08	5.77423
GRG3	0.3% NaCl	S03_16702037	3	16702037	1.14689e-09	6.67447
GRG3	0.3% NaCl	S03_16705165	3	16705165	7.16991e-08	5.37459
GRG3	0.3% NaCl	S03_16707227	3	16707227	4.30528e-10	6.97952
GRG3	0.3% NaCl	S03_16713630	3	16713630	3.46935e-09	6.32851
GRG3	0.3% NaCl	S03_16716976	3	16716976	6.35786e-09	6.13858
GRG3	0.3% NaCl	S03_16718007	3	16718007	6.22455e-10	6.86487
GRG3	0.3% NaCl	S03_16720103	3	16720103	7.73476e-11	7.5113
GRG3	0.3% NaCl	S03_16722132	3	16722132	1.00654e-08	5.99424
GRG3	0.3% NaCl	S03_16727363	3	16727363	1.21075e-09	6.65757
GRG3	0.3% NaCl	S03_16728414	3	16728414	1.44703e-09	6.60194
GRG3	0.3% NaCl	S03_16729492	3	16729492	5.20496e-10	6.92052
GRG3	0.3% NaCl	S03_16733441	3	16733441	3.31792e-11	7.77223
GRG3	0.3% NaCl	S03_16735605	3	16735605	4.64134e-09	6.23731
GRG3	0.3% NaCl	S03_16737624	3	16737624	5.77935e-10	6.88796
GRG3	0.3% NaCl	S03_16753383	3	16753383	2.19629e-08	5.74854
GRG3	0.3% NaCl	S03_16762131	3	16762131	6.01501e-09	6.15598
GRG3	0.3% NaCl	S03_16778150	3	16778150	3.6884e-08	5.58488
GRG3	0.3% NaCl	S03_16782310	3	16782310	7.91442e-09	6.06981
GRG3	0.3% NaCl	S03_16783315	3	16783315	6.2017e-09	6.14639
GRG3	0.3% NaCl	S03_16785364	3	16785364	9.95643e-08	5.27053
GRG3	0.3% NaCl	S03_16787498	3	16787498	1.08688e-08	5.97009
GRG3	0.3% NaCl	S03_16801428	3	16801428	4.47686e-09	6.24862
GRG3	0.3% NaCl	S03_16803597	3	16803597	6.98675e-09	6.10897
GRG3	0.3% NaCl	S03_16805854	3	16805854	1.77265e-08	5.81609
GRG3	0.3% NaCl	S03_16818310	3	16818310	8.95328e-09	6.03105
GRG3	0.3% NaCl	S03_16828557	3	16828557	4.25248e-08	5.53991
GRG3	0.3% NaCl	S03_16829575	3	16829575	1.08346e-07	5.24371
GRG3	0.3% NaCl	S03_16837159	3	16837159	5.35222e-08	5.46716
GRG3	0.3% NaCl	S03_16843782	3	16843782	2.29369e-10	7.17497
GRG3	0.3% NaCl	S03_16845986	3	16845986	1.07693e-07	5.24563
GRG3	0.3% NaCl	S03_16851263	3	16851263	9.72663e-11	7.44052
GRG3	0.3% NaCl	S03_16855912	3	16855912	3.99245e-11	7.71525
GRG3	0.3% NaCl	S03_16856935	3	16856935	4.60882e-11	7.67102
GRG3	0.3% NaCl	S03_16858546	3	16858546	3.90396e-09	6.29153
GRG3	0.3% NaCl	S03_16861738	3	16861738	1.45869e-10	7.31518
GRG3	0.3% NaCl	S03_16864936	3	16864936	4.9383e-08	5.49262
GRG3	0.3% NaCl	S03_16871086	3	16871086	2.5663e-09	6.42288
GRG3	0.3% NaCl	S03_16873239	3	16873239	4.04932e-10	6.99856
GRG3	0.3% NaCl	S03_16874249	3	16874249	9.14911e-08	5.29734
GRG3	0.3% NaCl	S03_16876298	3	16876298	6.77357e-08	5.3926
GRG3	0.3% NaCl	S03_16877346	3	16877346	2.12113e-09	6.48247
GRG3	0.3% NaCl	S03_16878477	3	16878477	1.39541e-10	7.32891
GRG3	0.3% NaCl	S03_16879736	3	16879736	1.78729e-09	6.53598
GRG3	0.3% NaCl	S03_16881995	3	16881995	1.46398e-10	7.31406
GRG3	0.3% NaCl	S03_16884260	3	16884260	7.07469e-10	6.82502
GRG3	0.3% NaCl	S03_16885260	3	16885260	1.17323e-07	5.21846
GRG3	0.3% NaCl	S03_16887296	3	16887296	3.33547e-10	7.0588
GRG3	0.3% NaCl	S03_16888298	3	16888298	5.1154e-11	7.63887
GRG3	0.3% NaCl	S03_16889457	3	16889457	2.73163e-10	7.12078
GRG3	0.3% NaCl	S03_16890707	3	16890707	6.32532e-10	6.85988
GRG3	0.3% NaCl	S03_16891826	3	16891826	4.63835e-09	6.23751
GRG3	0.3% NaCl	S03_16892840	3	16892840	2.79707e-09	6.39594
GRG3	0.3% NaCl	S03_16893846	3	16893846	1.14835e-09	6.67408
GRG3	0.3% NaCl	S03_16898407	3	16898407	1.80764e-09	6.53245
GRG3	0.3% NaCl	S03_16902453	3	16902453	1.61009e-12	8.69828
GRG3	0.3% NaCl	S03_16904571	3	16904571	2.38268e-10	7.16317
GRG3	0.3% NaCl	S03_16906572	3	16906572	1.31801e-09	6.63109
GRG3	0.3% NaCl	S03_16907603	3	16907603	8.02948e-09	6.06527
GRG3	0.3% NaCl	S03_16912723	3	16912723	1.21774e-08	5.93433
GRG3	0.3% NaCl	S03_16913725	3	16913725	1.47411e-09	6.59615
GRG3	0.3% NaCl	S03_16914736	3	16914736	1.00349e-07	5.26804
GRG3	0.3% NaCl	S03_16915873	3	16915873	1.56278e-09	6.57791
GRG3	0.3% NaCl	S03_16918503	3	16918503	8.12804e-10	6.7818
GRG3	0.3% NaCl	S03_16920011	3	16920011	2.72948e-10	7.12102
GRG3	0.3% NaCl	S03_16921021	3	16921021	5.36024e-08	5.46668
GRG3	0.3% NaCl	S03_16926273	3	16926273	4.0632e-08	5.5543
GRG3	0.3% NaCl	S03_16927306	3	16927306	3.6099e-09	6.31607
GRG3	0.3% NaCl	S03_16928389	3	16928389	4.81838e-09	6.22557
GRG3	0.3% NaCl	S03_16929623	3	16929623	1.57565e-07	5.12482
GRG3	0.3% NaCl	S03_16930918	3	16930918	3.73452e-09	6.30544
GRG3	0.3% NaCl	S03_16936283	3	16936283	2.88121e-09	6.38666
GRG3	0.3% NaCl	S03_16939884	3	16939884	1.23123e-08	5.93086
GRG3	0.3% NaCl	S03_16941017	3	16941017	7.33935e-11	7.5275
GRG3	0.3% NaCl	S03_16942221	3	16942221	3.22634e-09	6.35125
GRG3	0.3% NaCl	S03_16943276	3	16943276	2.76988e-08	5.67533
GRG3	0.3% NaCl	S03_16946058	3	16946058	3.25236e-09	6.34873
GRG3	0.3% NaCl	S03_16947842	3	16947842	1.54834e-08	5.85871
GRG3	0.3% NaCl	S03_16948934	3	16948934	3.54234e-09	6.32199
GRG3	0.3% NaCl	S03_16950009	3	16950009	1.05058e-07	5.25349
GRG3	0.3% NaCl	S03_16952912	3	16952912	1.87711e-09	6.52066
GRG3	0.3% NaCl	S03_16954242	3	16954242	1.23323e-08	5.93035
GRG3	0.3% NaCl	S03_16960560	3	16960560	5.20673e-09	6.20126
GRG3	0.3% NaCl	S03_16961601	3	16961601	1.45812e-09	6.59955
GRG3	0.3% NaCl	S03_16963623	3	16963623	1.01759e-08	5.99081
GRG3	0.3% NaCl	S03_16964626	3	16964626	1.34923e-10	7.33932
GRG3	0.3% NaCl	S03_16967089	3	16967089	4.17925e-08	5.5454
GRG3	0.3% NaCl	S03_16972738	3	16972738	1.29031e-07	5.18826
GRG3	0.3% NaCl	S03_16974745	3	16974745	4.43855e-08	5.52637
GRG3	0.3% NaCl	S03_16975973	3	16975973	1.0773e-07	5.24552
GRG3	0.3% NaCl	S03_16990579	3	16990579	7.60977e-08	5.35573
GRG3	0.3% NaCl	S03_16991596	3	16991596	8.43146e-08	5.32324
GRG3	0.3% NaCl	S03_16992621	3	16992621	5.49848e-08	5.45863
GRG3	0.3% NaCl	S03_17006441	3	17006441	1.40863e-07	5.16041
GRG3	0.3% NaCl	S03_17007467	3	17007467	4.01075e-09	6.28308
GRG3	0.3% NaCl	S03_17008570	3	17008570	2.88234e-08	5.66277
GRG3	0.3% NaCl	S03_17013993	3	17013993	1.18708e-07	5.21473
GRG3	0.3% NaCl	S03_17186071	3	17186071	1.36603e-07	5.17016
GRG3	0.3% NaCl	S03_21190105	3	21190105	6.9851e-08	5.38286
GRG3	0.3% NaCl	S03_21191118	3	21191118	6.18154e-08	5.42156
GRG3	0.3% NaCl	S03_22537919	3	22537919	1.41819e-08	5.88636
GRG3	0.3% NaCl	S03_22550861	3	22550861	6.64471e-09	6.12473
GRG3	0.3% NaCl	S03_22554026	3	22554026	8.98481e-08	5.30309
GRG3	0.3% NaCl	S03_22555035	3	22555035	7.66904e-08	5.35327
GRG3	0.3% NaCl	S03_22558070	3	22558070	5.45845e-08	5.46094
GRG3	0.3% NaCl	S03_22560180	3	22560180	4.05839e-09	6.27938
GRG3	0.3% NaCl	S03_22562190	3	22562190	1.26025e-08	5.92353
GRG3	0.3% NaCl	S03_22576593	3	22576593	3.3627e-08	5.61409
GRG3	0.3% NaCl	S03_22586082	3	22586082	3.62535e-09	6.31473
GRG3	0.3% NaCl	S03_22588103	3	22588103	1.53094e-08	5.86227
GRG3	0.3% NaCl	S03_22592784	3	22592784	3.2176e-08	5.62802
GRG3	0.3% NaCl	S03_22597109	3	22597109	2.57148e-09	6.42225
GRG3	0.3% NaCl	S03_22599555	3	22599555	7.80733e-09	6.07409
GRG3	0.3% NaCl	S03_22600688	3	22600688	2.36121e-08	5.7257
GRG3	0.3% NaCl	S03_22604015	3	22604015	1.42734e-07	5.15622
GRG3	0.3% NaCl	S03_22609322	3	22609322	1.31292e-08	5.91064
GRG3	0.3% NaCl	S03_22614759	3	22614759	3.66785e-08	5.58665
GRG3	0.3% NaCl	S03_22618083	3	22618083	1.49318e-09	6.59213
GRG3	0.3% NaCl	S03_22622702	3	22622702	1.56564e-07	5.12684
GRG3	0.3% NaCl	S03_22629156	3	22629156	4.19124e-08	5.54449
GRG3	0.3% NaCl	S03_22632415	3	22632415	8.80436e-09	6.03632
GRG3	0.3% NaCl	S03_22633458	3	22633458	1.38426e-07	5.16595
GRG3	0.3% NaCl	S03_22635673	3	22635673	6.80536e-08	5.39112
GRG3	0.3% NaCl	S03_22646500	3	22646500	6.59462e-09	6.1271
GRG3	0.3% NaCl	S03_22657309	3	22657309	4.72985e-08	5.50626
GRG3	0.3% NaCl	S03_22663842	3	22663842	9.71115e-08	5.27844
GRG3	0.3% NaCl	S03_22694707	3	22694707	1.16692e-07	5.22017
GRG3	0.3% NaCl	S03_24479544	3	24479544	7.08015e-10	6.82478
GRG3	0.3% NaCl	S03_24484742	3	24484742	2.90703e-08	5.66007
GRG3	0.3% NaCl	S03_24639135	3	24639135	8.94736e-08	5.30441
GRG3	0.3% NaCl	S03_25379705	3	25379705	9.27116e-08	5.29314
GRG3	0.3% NaCl	S03_25388313	3	25388313	7.48703e-08	5.36088
GRG3	0.3% NaCl	S03_25396382	3	25396382	9.15706e-08	4.67741
GRG3	0.3% NaCl	S03_25422614	3	25422614	1.19482e-07	5.21267
GRG3	0.3% NaCl	S03_25423615	3	25423615	2.01256e-08	5.77608
GRG3	0.3% NaCl	S03_25655773	3	25655773	7.19494e-08	5.37349
GRG3	0.3% NaCl	S03_25972666	3	25972666	5.67314e-08	5.44873
GRG3	0.3% NaCl	S03_25979279	3	25979279	9.8418e-09	6.00131
GRG3	0.3% NaCl	S03_25980334	3	25980334	2.58385e-09	6.42075
GRG3	0.3% NaCl	S03_25982575	3	25982575	1.2102e-08	5.93628
GRG3	0.3% NaCl	S03_25984756	3	25984756	4.09326e-08	5.55197
GRG3	0.3% NaCl	S03_25985862	3	25985862	2.82346e-08	5.66928
GRG3	0.3% NaCl	S03_25986963	3	25986963	1.02703e-08	5.98791
GRG3	0.3% NaCl	S03_25988119	3	25988119	1.52845e-08	5.86279
GRG3	0.3% NaCl	S03_25990425	3	25990425	6.12476e-09	6.1503
GRG3	0.3% NaCl	S03_25991750	3	25991750	2.24938e-08	5.741
GRG3	0.3% NaCl	S03_25992908	3	25992908	2.25117e-08	5.74075
GRG3	0.3% NaCl	S03_25994248	3	25994248	9.92224e-09	5.99875
GRG3	0.3% NaCl	S03_26000609	3	26000609	1.71326e-08	5.82683
GRG3	0.3% NaCl	S03_26003811	3	26003811	1.61222e-08	5.84598
GRG3	0.3% NaCl	S03_26006029	3	26006029	6.342e-08	5.41345
GRG3	0.3% NaCl	S03_26008169	3	26008169	1.27798e-07	5.19131
GRG3	0.3% NaCl	S03_26009175	3	26009175	7.08614e-09	6.10453
GRG3	0.3% NaCl	S03_26011269	3	26011269	3.14554e-08	5.63518
GRG3	0.3% NaCl	S03_26015666	3	26015666	1.53248e-07	5.13364
GRG3	0.3% NaCl	S03_26019837	3	26019837	1.26586e-08	5.92213
GRG3	0.3% NaCl	S03_26021335	3	26021335	9.149e-08	5.29735
GRG3	0.3% NaCl	S03_26022955	3	26022955	1.4914e-08	5.87051
GRG3	0.3% NaCl	S03_26025055	3	26025055	1.22435e-08	5.93262
GRG3	0.3% NaCl	S03_26027307	3	26027307	2.00979e-08	5.77652
GRG3	0.3% NaCl	S03_26028317	3	26028317	1.05239e-07	5.25294
GRG3	0.3% NaCl	S03_26029492	3	26029492	7.1841e-08	5.37397
GRG3	0.3% NaCl	S03_26031695	3	26031695	2.27999e-08	5.73674
GRG3	0.3% NaCl	S03_26041872	3	26041872	5.97631e-08	5.43225
GRG3	0.3% NaCl	S03_26147485	3	26147485	1.01156e-07	5.2655
GRG3	0.3% NaCl	S03_26153349	3	26153349	1.78954e-08	5.8131
GRG3	0.3% NaCl	S03_26174076	3	26174076	1.62633e-08	5.84323
GRG3	0.3% NaCl	S03_26182354	3	26182354	4.07879e-08	5.55309
GRG3	0.3% NaCl	S03_26196539	3	26196539	2.86981e-09	6.38791
GRG3	0.3% NaCl	S03_26200685	3	26200685	6.99627e-09	6.10854
GRG3	0.3% NaCl	S03_26778728	3	26778728	7.37045e-09	5.45399
GRG3	0.3% NaCl	S03_27525710	3	27525710	4.32103e-09	5.61807
GRG3	0.3% NaCl	S03_27530818	3	27530818	1.37978e-07	4.55073
GRG3	0.3% NaCl	S03_27814910	3	27814910	1.36971e-07	5.16931
GRG3	0.3% NaCl	S03_27819490	3	27819490	4.73489e-08	5.50593
GRG3	0.3% NaCl	S03_27820531	3	27820531	5.60402e-08	5.45261
GRG3	0.3% NaCl	S03_27829350	3	27829350	7.09532e-09	6.10412
GRG3	0.3% NaCl	S03_27836046	3	27836046	8.36755e-08	5.32565
GRG3	0.3% NaCl	S03_27842261	3	27842261	5.67617e-08	5.44856
GRG3	0.3% NaCl	S03_27859526	3	27859526	5.30362e-08	5.47004
GRG3	0.3% NaCl	S03_27863248	3	27863248	5.56272e-08	5.45495
GRG3	0.3% NaCl	S03_27891042	3	27891042	6.93765e-08	5.38502
GRG3	0.3% NaCl	S03_27895437	3	27895437	1.57545e-07	5.12486
GRG3	0.3% NaCl	S03_27921378	3	27921378	9.10398e-08	5.29891
GRG3	0.3% NaCl	S03_27972828	3	27972828	3.27726e-08	5.62222
GRG3	0.3% NaCl	S03_28003848	3	28003848	1.55869e-07	5.12826
GRG3	0.3% NaCl	S03_28041042	3	28041042	9.83904e-08	5.27429
GRG3	0.3% NaCl	S03_28051536	3	28051536	4.80467e-08	5.5013
GRG3	0.3% NaCl	S03_28053316	3	28053316	1.02318e-07	5.26188
GRG3	0.3% NaCl	S03_28058697	3	28058697	1.3971e-07	5.16302
GRG3	0.3% NaCl	S03_28088758	3	28088758	4.78262e-08	5.50276
GRG3	0.3% NaCl	S03_28091431	3	28091431	9.48191e-08	5.28601
GRG3	0.3% NaCl	S03_28095094	3	28095094	3.74265e-10	7.02303
GRG3	0.3% NaCl	S03_28569643	3	28569643	1.5132e-07	5.13767
GRG3	0.3% NaCl	S03_28639704	3	28639704	2.87779e-09	6.38704
GRG3	0.3% NaCl	S03_28689646	3	28689646	1.56302e-07	5.12737
GRG3	0.3% NaCl	S03_28709057	3	28709057	1.00975e-07	5.26606
GRG3	0.3% NaCl	S03_28713594	3	28713594	1.38697e-07	5.16533
GRG3	0.3% NaCl	S03_28731183	3	28731183	5.56268e-08	5.45495
GRG3	0.3% NaCl	S03_28737285	3	28737285	6.62126e-08	5.39981
GRG3	0.3% NaCl	S03_28745979	3	28745979	1.50174e-07	5.14008
GRG3	0.3% NaCl	S03_28752812	3	28752812	7.87676e-08	5.3448
GRG3	0.3% NaCl	S03_28754129	3	28754129	7.38384e-08	5.36528
GRG3	0.3% NaCl	S03_28756178	3	28756178	9.86054e-08	5.2736
GRG3	0.3% NaCl	S03_28759737	3	28759737	1.99528e-08	5.7788
GRG3	0.3% NaCl	S03_28760845	3	28760845	6.25192e-08	5.41798
GRG3	0.3% NaCl	S03_28771108	3	28771108	1.04718e-07	5.25452
GRG3	0.3% NaCl	S03_28778506	3	28778506	1.59448e-07	5.12104
GRG3	0.3% NaCl	S03_28786110	3	28786110	1.19817e-07	5.21178
GRG3	0.3% NaCl	S03_28793376	3	28793376	7.00018e-08	5.38218
GRG3	0.3% NaCl	S03_28800758	3	28800758	1.02134e-07	5.26245
GRG3	0.3% NaCl	S03_29063579	3	29063579	1.49531e-07	5.14144
GRG3	0.3% NaCl	S03_29064632	3	29064632	1.70566e-08	5.82823
GRG3	0.3% NaCl	S03_29594996	3	29594996	5.20059e-08	5.47625
GRG3	0.3% NaCl	S04_1557513	4	1557513	5.7717e-08	5.44328
GRG3	0.3% NaCl	S04_17279716	4	17279716	1.05251e-07	4.6344
GRG3	0.3% NaCl	S04_19939734	4	19939734	1.47525e-08	5.87394
GRG3	0.3% NaCl	S04_19948545	4	19948545	6.12296e-08	5.42458
GRG3	0.3% NaCl	S04_19958533	4	19958533	4.19323e-08	5.54434
GRG3	0.3% NaCl	S04_19982050	4	19982050	2.11359e-08	5.76064
GRG3	0.3% NaCl	S04_19983055	4	19983055	1.50925e-07	5.1385
GRG3	0.3% NaCl	S04_19985168	4	19985168	9.12734e-09	6.025
GRG3	0.3% NaCl	S04_19989523	4	19989523	6.62428e-08	5.39966
GRG3	0.3% NaCl	S04_20010414	4	20010414	1.3282e-07	5.17908
GRG3	0.3% NaCl	S04_20012883	4	20012883	1.02586e-07	5.26104
GRG3	0.3% NaCl	S04_20041848	4	20041848	2.69004e-08	5.68456
GRG3	0.3% NaCl	S04_20294867	4	20294867	2.00105e-08	5.77789
GRG3	0.3% NaCl	S04_20305450	4	20305450	5.61187e-08	5.45217
GRG3	0.3% NaCl	S04_20395108	4	20395108	1.18762e-07	5.21459
GRG3	0.3% NaCl	S04_20561936	4	20561936	1.72266e-08	5.8251
GRG3	0.3% NaCl	S04_23160958	4	23160958	8.0365e-08	5.33844
GRG3	0.3% NaCl	S04_24348176	4	24348176	7.60758e-08	5.35582
GRG3	0.3% NaCl	S04_32649414	4	32649414	1.20894e-07	5.20894
GRG3	0.3% NaCl	S04_34008144	4	34008144	1.30639e-07	5.18433
GRG3	0.3% NaCl	S04_34011813	4	34011813	1.49272e-07	5.14199
GRG3	0.3% NaCl	S05_1521940	5	1521940	5.81202e-08	5.44108
GRG3	0.3% NaCl	S05_3093116	5	3093116	1.43085e-08	5.88356
GRG3	0.3% NaCl	S05_3098163	5	3098163	8.37816e-08	5.32525
GRG3	0.3% NaCl	S05_11891480	5	11891480	1.23606e-07	5.2019
GRG3	0.3% NaCl	S05_27655826	5	27655826	1.9648e-08	5.78365
GRG3	0.3% NaCl	S05_27858716	5	27858716	9.08597e-08	5.29954
GRG3	0.3% NaCl	S05_27874908	5	27874908	9.95707e-08	5.27051
GRG3	0.3% NaCl	S05_27895258	5	27895258	1.5364e-07	5.13283
GRG3	0.3% NaCl	S05_27896359	5	27896359	7.35569e-08	5.36649
GRG3	0.3% NaCl	S05_27911540	5	27911540	1.31678e-09	6.63138
GRG3	0.3% NaCl	S05_27916728	5	27916728	3.76186e-09	6.30315
GRG3	0.3% NaCl	S05_27934857	5	27934857	2.31095e-08	5.73249
GRG3	0.3% NaCl	S05_27942462	5	27942462	2.60989e-08	5.69411
GRG3	0.3% NaCl	S05_27949261	5	27949261	9.83895e-08	5.27429
GRG3	0.3% NaCl	S05_27950265	5	27950265	9.25623e-08	5.29365
GRG3	0.3% NaCl	S05_27951265	5	27951265	2.55477e-09	6.42429
GRG3	0.3% NaCl	S05_27952269	5	27952269	6.65937e-09	6.12403
GRG3	0.3% NaCl	S05_27961292	5	27961292	1.22604e-08	5.93219
GRG3	0.3% NaCl	S05_27971523	5	27971523	1.37014e-09	6.61898
GRG3	0.3% NaCl	S05_27972830	5	27972830	2.53403e-08	5.70341
GRG3	0.3% NaCl	S05_27973962	5	27973962	2.16703e-09	6.47577
GRG3	0.3% NaCl	S05_27993091	5	27993091	1.39617e-10	7.32874
GRG3	0.3% NaCl	S05_28026580	5	28026580	1.3637e-08	5.8987
GRG3	0.3% NaCl	S05_28027662	5	28027662	4.79002e-10	6.94636
GRG3	0.3% NaCl	S05_28050331	5	28050331	5.12341e-10	6.92543
GRG3	0.3% NaCl	S05_28081822	5	28081822	7.363e-12	8.23431
GRG3	0.3% NaCl	S06_1787195	6	1787195	3.62096e-08	5.59072
GRG3	0.3% NaCl	S06_1789336	6	1789336	1.53364e-07	5.1334
GRG3	0.3% NaCl	S06_1800538	6	1800538	8.03179e-08	5.33863
GRG3	0.3% NaCl	S06_3953302	6	3953302	1.3217e-07	5.18063
GRG3	0.3% NaCl	S06_3969525	6	3969525	1.10408e-07	5.23773
GRG3	0.3% NaCl	S06_3981048	6	3981048	4.30768e-08	5.53583
GRG3	0.3% NaCl	S06_3983217	6	3983217	1.53526e-08	5.86138
GRG3	0.3% NaCl	S06_3990470	6	3990470	4.59674e-08	5.51529
GRG3	0.3% NaCl	S06_3992794	6	3992794	4.25044e-08	5.54006
GRG3	0.3% NaCl	S06_3994875	6	3994875	1.05695e-07	5.25157
GRG3	0.3% NaCl	S06_4004098	6	4004098	4.02574e-08	5.55723
GRG3	0.3% NaCl	S06_6280780	6	6280780	2.14568e-08	5.75589
GRG3	0.3% NaCl	S06_6802721	6	6802721	3.81663e-08	5.57409
GRG3	0.3% NaCl	S06_6820916	6	6820916	1.14516e-07	5.22614
GRG3	0.3% NaCl	S06_6868562	6	6868562	1.12501e-07	5.23178
GRG3	0.3% NaCl	S06_6907904	6	6907904	1.13848e-08	5.9555
GRG3	0.3% NaCl	S06_6921594	6	6921594	1.06261e-07	5.24988
GRG3	0.3% NaCl	S06_8856428	6	8856428	6.90892e-08	4.76441
GRG3	0.3% NaCl	S07_2018735	7	2018735	5.0839e-08	5.48343
GRG3	0.3% NaCl	S07_11479282	7	11479282	2.04882e-08	5.13933
GRG3	0.3% NaCl	S07_12333187	7	12333187	1.15619e-07	4.60537
GRG3	0.3% NaCl	S07_12540860	7	12540860	4.12804e-09	5.6321
GRG3	0.3% NaCl	S07_12582088	7	12582088	5.81227e-08	4.81777
GRG3	0.3% NaCl	S07_16821845	7	16821845	4.31383e-08	4.90978
GRG3	0.3% NaCl	S07_21960632	7	21960632	1.15572e-07	5.22323
GRG3	0.3% NaCl	S07_22067146	7	22067146	4.07501e-08	5.55338
GRG3	0.3% NaCl	S07_22072389	7	22072389	2.74063e-09	6.40232
GRG3	0.3% NaCl	S08_3363607	8	3363607	1.59639e-07	5.12066
GRG3	0.3% NaCl	S08_13559889	8	13559889	3.06996e-09	5.72301
GRG3	0.3% NaCl	S08_18665308	8	18665308	1.06692e-07	5.2486
GRG3	0.3% NaCl	S08_22329304	8	22329304	6.17905e-08	4.79888
GRG3	0.3% NaCl	S09_280482	9	280482	2.32419e-08	5.73068
GRG3	0.3% NaCl	S09_2899562	9	2899562	3.32321e-08	5.61782
GRG3	0.3% NaCl	S09_5203649	9	5203649	1.39503e-07	5.16349
GRG3	0.3% NaCl	S09_12399230	9	12399230	1.15943e-09	6.67108
GRG3	0.3% NaCl	S09_12425219	9	12425219	1.0235e-08	5.98899
GRG3	0.3% NaCl	S09_12438413	9	12438413	2.79176e-08	5.67285
GRG3	0.3% NaCl	S09_12452346	9	12452346	3.30173e-09	6.34401
GRG3	0.3% NaCl	S09_12455427	9	12455427	5.77281e-08	5.44322
GRG3	0.3% NaCl	S09_12457465	9	12457465	1.53606e-08	5.86122
GRG3	0.3% NaCl	S09_12542527	9	12542527	3.25828e-08	5.62405
GRG3	0.3% NaCl	S09_12547722	9	12547722	5.27163e-08	5.47196
GRG3	0.3% NaCl	S09_12563861	9	12563861	1.36685e-07	5.16997
GRG3	0.3% NaCl	S10_6424225	10	6424225	4.7123e-09	5.59145
GRG3	0.3% NaCl	S10_6433726	10	6433726	4.86103e-08	4.87293
GRG3	0.3% NaCl	S10_10807166	10	10807166	8.87349e-10	6.75446
GRG3	0.3% NaCl	S10_17303203	10	17303203	7.05752e-08	5.3796
GRG3	0.3% NaCl	S10_22588609	10	22588609	4.46265e-09	6.24961
GRG3	0.3% NaCl	S11_6781266	11	6781266	1.52815e-07	5.13454
GRG3	0.3% NaCl	S11_11697411	11	11697411	7.51065e-08	5.35988
GRG3	0.3% NaCl	S11_13049418	11	13049418	2.64173e-08	5.061
GRG3	0.3% NaCl	S11_16579441	11	16579441	7.06849e-08	5.37911
GRG3	0.3% NaCl	S11_24743998	11	24743998	5.02805e-08	4.8625
GRG3	0.3% NaCl	S11_27851674	11	27851674	2.49786e-09	6.43134
GRG3	0.3% NaCl	S12_4636032	12	4636032	1.04135e-07	4.63769
GRG3	0.3% NaCl	S12_4807799	12	4807799	2.82338e-08	5.0405
GRG3	0.3% NaCl	S12_6753201	12	6753201	6.33076e-08	5.41401
GRG3	0.3% NaCl	S12_6952228	12	6952228	3.95983e-08	5.56244
GRG3	0.3% NaCl	S12_6953252	12	6953252	6.91697e-09	6.11212
GRG3	0.3% NaCl	S12_6958707	12	6958707	7.51907e-09	6.08591
GRG3	0.3% NaCl	S12_6965131	12	6965131	2.36112e-09	6.44895
GRG3	0.3% NaCl	S12_6968212	12	6968212	1.50253e-07	5.13991
GRG3	0.3% NaCl	S12_6969218	12	6969218	6.26008e-08	5.41757
GRG3	0.3% NaCl	S12_6975849	12	6975849	5.73089e-08	5.44553
GRG3	0.3% NaCl	S12_7035323	12	7035323	1.2597e-07	5.19589
GRG3	0.3% NaCl	S12_10582290	12	10582290	6.38714e-09	6.13714
GRG3	0.3% NaCl	S12_10659644	12	10659644	1.51932e-07	5.13638
GRG3	0.3% NaCl	S12_10671718	12	10671718	8.24856e-08	5.33019
GRG3	0.3% NaCl	S12_10761452	12	10761452	6.96557e-09	6.10992
GRG3	0.3% NaCl	S12_10774187	12	10774187	6.00111e-08	5.43094
GRG3	0.3% NaCl	S12_10776256	12	10776256	1.46589e-08	5.87594
GRG3	0.3% NaCl	S12_10779280	12	10779280	8.87472e-08	5.307
GRG3	0.3% NaCl	S12_10785319	12	10785319	1.32106e-07	5.18079
GRG3	0.3% NaCl	S12_10787392	12	10787392	5.80341e-08	5.44155
GRG3	0.3% NaCl	S12_10788392	12	10788392	1.24806e-08	5.92659
GRG3	0.3% NaCl	S12_10789406	12	10789406	1.73392e-08	5.82305
GRG3	0.3% NaCl	S12_10790419	12	10790419	1.67784e-08	5.83341
GRG3	0.3% NaCl	S12_10792430	12	10792430	2.43279e-09	6.4396
GRG3	0.3% NaCl	S12_10797594	12	10797594	1.50537e-09	6.5896
GRG3	0.3% NaCl	S12_10799734	12	10799734	3.32092e-09	6.3422
GRG3	0.3% NaCl	S12_10801871	12	10801871	6.03268e-09	6.15506
GRG3	0.3% NaCl	S12_10805099	12	10805099	2.91273e-08	5.65946
GRG3	0.3% NaCl	S12_10811135	12	10811135	5.12938e-08	5.48061
GRG3	0.3% NaCl	S12_10813224	12	10813224	6.81457e-09	6.1168
GRG3	0.3% NaCl	S12_10815266	12	10815266	6.85191e-08	5.38896
GRG3	0.3% NaCl	S12_10816266	12	10816266	2.23863e-08	5.74251
GRG3	0.3% NaCl	S12_10819488	12	10819488	9.22571e-08	5.2947
GRG3	0.3% NaCl	S12_10822611	12	10822611	1.71653e-08	5.82623
GRG3	0.3% NaCl	S12_10830651	12	10830651	2.05676e-08	5.76923
GRG3	0.3% NaCl	S12_10831696	12	10831696	4.22702e-08	5.5418
GRG3	0.3% NaCl	S12_10832806	12	10832806	1.53773e-07	5.13256
GRG3	0.3% NaCl	S12_10833973	12	10833973	7.83798e-08	5.34637
GRG3	0.3% NaCl	S12_10854065	12	10854065	5.86425e-08	5.43824
GRG3	0.3% NaCl	S12_10855263	12	10855263	1.13831e-07	5.22805
GRG3	0.3% NaCl	S12_10860321	12	10860321	7.9266e-08	5.34281
GRG3	0.3% NaCl	S12_10863577	12	10863577	5.12121e-09	6.20645
GRG3	0.3% NaCl	S12_10870666	12	10870666	2.47821e-09	6.43381
GRG3	0.3% NaCl	S12_10872729	12	10872729	4.15741e-08	5.54705
GRG3	0.3% NaCl	S12_10886200	12	10886200	6.32508e-08	5.4143
GRG3	0.3% NaCl	S12_10896171	12	10896171	1.09929e-08	5.96652
GRG3	0.3% NaCl	S12_10907539	12	10907539	1.53184e-07	5.13378
GRG3	0.3% NaCl	S12_10912075	12	10912075	9.06448e-08	5.30029
GRG3	0.3% NaCl	S12_10919258	12	10919258	2.51993e-08	5.70518
GRG3	0.3% NaCl	S12_10926405	12	10926405	2.13528e-08	5.75742
GRG3	0.3% NaCl	S12_10940833	12	10940833	9.42935e-09	6.01477
GRG3	0.3% NaCl	S12_10944321	12	10944321	1.93286e-08	5.78882
GRG3	0.3% NaCl	S12_10945397	12	10945397	1.31103e-08	5.9111
GRG3	0.3% NaCl	S12_10946515	12	10946515	2.34114e-08	5.72839
GRG3	0.3% NaCl	S12_10947577	12	10947577	1.61539e-08	5.84536
GRG3	0.3% NaCl	S12_10948617	12	10948617	9.34797e-09	6.01749
GRG3	0.3% NaCl	S12_10952911	12	10952911	1.12473e-08	5.95932
GRG3	0.3% NaCl	S12_10960891	12	10960891	1.48156e-08	5.8726
GRG3	0.3% NaCl	S12_10962382	12	10962382	7.05016e-08	5.37993
GRG3	0.3% NaCl	S12_10963562	12	10963562	5.39362e-08	5.46472
GRG3	0.3% NaCl	S12_10970411	12	10970411	2.68333e-08	5.68535
GRG3	0.3% NaCl	S12_10971605	12	10971605	2.49586e-08	5.7082
GRG3	0.3% NaCl	S12_10975215	12	10975215	7.77801e-09	6.07527
GRG3	0.3% NaCl	S12_10976288	12	10976288	4.82863e-08	5.49973
GRG3	0.3% NaCl	S12_10984645	12	10984645	4.40612e-08	5.52868
GRG3	0.3% NaCl	S12_10989897	12	10989897	5.55741e-08	5.45525
GRG3	0.3% NaCl	S12_10990965	12	10990965	1.25059e-07	5.19819
GRG3	0.3% NaCl	S12_11008041	12	11008041	9.46765e-09	6.01349
GRG3	0.3% NaCl	S12_11012172	12	11012172	1.21874e-07	5.20638
GRG3	0.3% NaCl	S12_11039381	12	11039381	9.98276e-09	5.99684
GRG3	0.3% NaCl	S12_11040393	12	11040393	2.17428e-08	5.75171
GRG3	0.3% NaCl	S12_11042597	12	11042597	6.57463e-08	5.40204
GRG3	0.3% NaCl	S12_11055600	12	11055600	2.04988e-08	5.77029
GRG3	0.3% NaCl	S12_11063820	12	11063820	1.35141e-07	5.17358
GRG3	0.3% NaCl	S12_11068432	12	11068432	7.54932e-08	5.35826
GRG3	0.3% NaCl	S12_11079040	12	11079040	5.52828e-09	6.18246
GRG3	0.3% NaCl	S12_11085901	12	11085901	3.81807e-09	6.2985
GRG3	0.3% NaCl	S12_11091237	12	11091237	1.60989e-07	5.11799
GRG3	0.3% NaCl	S12_11096482	12	11096482	1.55244e-08	5.85788
GRG3	0.3% NaCl	S12_11098783	12	11098783	6.93686e-08	5.38506
GRG3	0.3% NaCl	S12_11138923	12	11138923	1.25308e-07	5.19756
GRG3	0.3% NaCl	S12_11140198	12	11140198	2.47282e-08	5.71113
GRG3	0.3% NaCl	S12_11144948	12	11144948	9.88958e-09	5.99978
GRG3	0.3% NaCl	S12_11146003	12	11146003	8.11725e-08	5.33527
GRG3	0.3% NaCl	S12_11149721	12	11149721	6.20323e-08	5.42045
GRG3	0.3% NaCl	S12_11159021	12	11159021	6.92102e-09	6.11193
GRG3	0.3% NaCl	S12_11163511	12	11163511	5.17099e-08	5.47806
GRG3	0.3% NaCl	S12_11168524	12	11168524	4.1274e-08	5.54934
GRG3	0.3% NaCl	S12_11180009	12	11180009	7.8591e-08	5.34552
GRG3	0.3% NaCl	S12_11182074	12	11182074	5.72372e-08	5.44592
GRG3	0.3% NaCl	S12_11199961	12	11199961	8.87102e-08	5.30713
GRG3	0.3% NaCl	S12_11202199	12	11202199	4.62277e-08	5.51351
GRG3	0.3% NaCl	S12_11250948	12	11250948	1.57616e-07	5.12472
GRG3	0.3% NaCl	S12_11252414	12	11252414	6.24092e-08	5.41854
GRG3	0.3% NaCl	S12_11260055	12	11260055	5.78025e-08	5.44281
GRG3	0.3% NaCl	S12_11261653	12	11261653	9.69061e-08	5.27911
GRG3	0.3% NaCl	S12_11264814	12	11264814	2.13846e-08	5.75695
GRG3	0.3% NaCl	S12_11268939	12	11268939	1.47196e-07	5.14644
GRG3	0.3% NaCl	S12_11269945	12	11269945	8.63398e-08	5.31571
GRG3	0.3% NaCl	S12_11275044	12	11275044	1.02422e-07	5.26155
GRG3	0.3% NaCl	S12_11276072	12	11276072	4.74438e-08	5.50529
GRG3	0.3% NaCl	S12_11280555	12	11280555	9.27295e-08	5.29308
GRG3	0.3% NaCl	S12_11281606	12	11281606	3.77293e-08	5.57772
GRG3	0.3% NaCl	S12_11290041	12	11290041	2.54805e-08	5.70167
GRG3	0.3% NaCl	S12_11317091	12	11317091	4.87428e-08	5.49675
GRG3	0.3% NaCl	S12_11318185	12	11318185	3.86697e-09	6.29452
GRG3	0.3% NaCl	S12_11320208	12	11320208	4.3781e-08	5.5307
GRG3	0.3% NaCl	S12_11321257	12	11321257	5.80821e-08	5.44128
GRG3	0.3% NaCl	S12_11323295	12	11323295	1.03701e-07	5.25761
GRG3	0.3% NaCl	S12_11325358	12	11325358	6.81988e-08	5.39045
GRG3	0.3% NaCl	S12_11326364	12	11326364	3.26869e-09	6.34716
GRG3	0.3% NaCl	S12_11332494	12	11332494	6.9865e-09	5.47044
GRG3	0.3% NaCl	S12_11337632	12	11337632	1.27375e-07	5.19237
GRG3	0.3% NaCl	S12_11340737	12	11340737	3.74865e-08	5.57977
GRG3	0.3% NaCl	S12_11341760	12	11341760	1.09086e-08	5.96894
GRG3	0.3% NaCl	S12_11342835	12	11342835	1.08135e-07	5.24433
GRG3	0.3% NaCl	S12_11347974	12	11347974	2.98131e-08	5.65211
GRG3	0.3% NaCl	S12_11357099	12	11357099	5.15804e-08	5.47885
GRG3	0.3% NaCl	S12_11362194	12	11362194	1.37993e-07	5.16695
GRG3	0.3% NaCl	S12_11363302	12	11363302	5.10306e-08	5.48224
GRG3	0.3% NaCl	S12_11364821	12	11364821	4.17741e-09	6.27032
GRG3	0.3% NaCl	S12_11367410	12	11367410	8.91778e-08	5.30546
GRG3	0.3% NaCl	S12_11368420	12	11368420	3.70151e-08	5.58376
GRG3	0.3% NaCl	S12_11370494	12	11370494	8.67128e-09	6.04111
GRG3	0.3% NaCl	S12_11371691	12	11371691	5.95254e-08	5.43351
GRG3	0.3% NaCl	S12_11375101	12	11375101	9.11999e-08	5.29835
GRG3	0.3% NaCl	S12_11381381	12	11381381	1.02962e-07	5.25988
GRG3	0.3% NaCl	S12_11382436	12	11382436	5.47438e-08	5.46002
GRG3	0.3% NaCl	S12_11384479	12	11384479	3.21701e-08	5.62808
GRG3	0.3% NaCl	S12_11388528	12	11388528	4.12305e-08	5.54968
GRG3	0.3% NaCl	S12_11416561	12	11416561	2.92171e-08	5.65848
GRG3	0.3% NaCl	S12_11417655	12	11417655	1.79927e-08	5.81139
GRG3	0.3% NaCl	S12_11418661	12	11418661	5.0197e-08	5.48745
GRG3	0.3% NaCl	S12_11421703	12	11421703	6.27993e-08	5.41656
GRG3	0.3% NaCl	S12_11422732	12	11422732	1.41934e-07	5.158
GRG3	0.3% NaCl	S12_11423834	12	11423834	5.70432e-09	6.17262
GRG3	0.3% NaCl	S12_11424858	12	11424858	3.19771e-08	5.62998
GRG3	0.3% NaCl	S12_11429142	12	11429142	2.16661e-08	5.75283
GRG3	0.3% NaCl	S12_11433212	12	11433212	3.59613e-08	5.59289
GRG3	0.3% NaCl	S12_11436691	12	11436691	5.07419e-09	6.20934
GRG3	0.3% NaCl	S12_11462811	12	11462811	3.24931e-08	5.62493
GRG3	0.3% NaCl	S12_11495671	12	11495671	1.44512e-08	5.88044
GRG3	0.3% NaCl	S12_11576939	12	11576939	3.70553e-08	5.58342
GRG3	0.3% NaCl	S12_11584211	12	11584211	1.37764e-07	5.16747
GRG3	0.3% NaCl	S12_11623746	12	11623746	2.52597e-08	5.70442
GRG3	0.3% NaCl	S12_11680681	12	11680681	1.2582e-07	5.19626
GRG3	0.3% NaCl	S12_11716220	12	11716220	1.42078e-08	5.88579
GRG3	0.3% NaCl	S12_11717247	12	11717247	5.44654e-08	5.46163
GRG3	0.3% NaCl	S12_11718262	12	11718262	1.26569e-07	5.19438
GRG3	0.3% NaCl	S12_11723666	12	11723666	5.4327e-08	5.46244
GRG3	0.3% NaCl	S12_11724670	12	11724670	1.07174e-07	5.24716
GRG3	0.3% NaCl	S12_11725738	12	11725738	1.55919e-07	5.12815
GRG3	0.3% NaCl	S12_11726738	12	11726738	9.01941e-08	5.30187
GRG3	0.3% NaCl	S12_11728491	12	11728491	1.68707e-08	5.83168
GRG3	0.3% NaCl	S12_11729544	12	11729544	6.35444e-08	5.41283
GRG3	0.3% NaCl	S12_11730552	12	11730552	1.24596e-07	5.19937
GRG3	0.3% NaCl	S12_11733740	12	11733740	8.36803e-08	5.32563
GRG3	0.3% NaCl	S12_11739055	12	11739055	9.74968e-08	5.27718
GRG3	0.3% NaCl	S12_11741297	12	11741297	6.08689e-08	5.42645
GRG3	0.3% NaCl	S12_11742390	12	11742390	2.66824e-08	5.68713
GRG3	0.3% NaCl	S12_11744620	12	11744620	7.17014e-08	5.37458
GRG3	0.3% NaCl	S12_11746631	12	11746631	5.24671e-08	5.47346
GRG3	0.3% NaCl	S12_11752731	12	11752731	5.06635e-08	5.48452
GRG3	0.3% NaCl	S12_11757823	12	11757823	3.29715e-08	5.62031
GRG3	0.3% NaCl	S12_11758853	12	11758853	5.7286e-08	5.44565
GRG3	0.3% NaCl	S12_11763039	12	11763039	9.7879e-08	5.27594
GRG3	0.3% NaCl	S12_11764041	12	11764041	1.70104e-08	5.82908
GRG3	0.3% NaCl	S12_11772201	12	11772201	1.26969e-07	5.19338
GRG3	0.3% NaCl	S12_11897156	12	11897156	3.78447e-08	5.57676
GRG3	0.3% NaCl	S12_11916156	12	11916156	5.15225e-08	5.47921
GRG3	0.3% NaCl	S12_11923842	12	11923842	3.02519e-08	5.64749
GRG3	0.3% NaCl	S12_11930348	12	11930348	9.81047e-10	6.72318
GRG3	0.3% NaCl	S12_11931352	12	11931352	5.49984e-08	5.45855
GRG3	0.3% NaCl	S12_11935535	12	11935535	3.20562e-08	5.6292
GRG3	0.3% NaCl	S12_11946918	12	11946918	4.9712e-08	5.49052
GRG3	0.3% NaCl	S12_11953050	12	11953050	6.09346e-08	5.42611
GRG3	0.3% NaCl	S12_11954056	12	11954056	1.54195e-07	5.13169
GRG3	0.3% NaCl	S12_12075840	12	12075840	6.89227e-08	5.3871
GRG3	0.3% NaCl	S12_12076916	12	12076916	9.36096e-08	5.29008
GRG3	0.3% NaCl	S12_12081084	12	12081084	3.29634e-08	5.62039
GRG3	0.3% NaCl	S12_12083114	12	12083114	5.13377e-08	5.48034
GRG3	0.3% NaCl	S12_12084196	12	12084196	1.18767e-08	5.94219
GRG3	0.3% NaCl	S12_12106714	12	12106714	1.47569e-07	5.14564
GRG3	0.3% NaCl	S12_12114268	12	12114268	4.41465e-08	5.52807
GRG3	0.3% NaCl	S12_12167110	12	12167110	9.94402e-08	5.27092
GRG3	0.3% NaCl	S12_12194286	12	12194286	9.36573e-09	6.01689
GRG3	0.3% NaCl	S12_12201304	12	12201304	5.12768e-08	5.48072
GRG3	0.3% NaCl	S12_12202479	12	12202479	4.40203e-08	5.52898
GRG3	0.3% NaCl	S12_12203545	12	12203545	1.6502e-08	5.83864
GRG3	0.3% NaCl	S12_12204969	12	12204969	1.41652e-07	5.15863
GRG3	0.3% NaCl	S12_12206070	12	12206070	7.3043e-09	6.09501
GRG3	0.3% NaCl	S12_12224903	12	12224903	6.06634e-08	5.42752
GRG3	0.3% NaCl	S12_12226107	12	12226107	8.08e-09	6.0633
GRG3	0.3% NaCl	S12_12231513	12	12231513	1.04208e-08	5.98333
GRG3	0.3% NaCl	S12_12237951	12	12237951	1.08391e-07	5.24358
GRG3	0.3% NaCl	S12_12241207	12	12241207	1.50547e-07	5.13929
GRG3	0.3% NaCl	S12_12242237	12	12242237	4.38314e-08	5.53034
GRG3	0.3% NaCl	S12_12244338	12	12244338	1.47904e-07	5.14492
GRG3	0.3% NaCl	S12_12263506	12	12263506	7.84814e-08	5.34596
GRG3	0.3% NaCl	S12_12264688	12	12264688	1.43819e-07	5.15381
GRG3	0.3% NaCl	S12_12265710	12	12265710	8.25212e-09	6.05668
GRG3	0.3% NaCl	S12_12266723	12	12266723	2.96794e-08	5.65353
GRG3	0.3% NaCl	S12_12267737	12	12267737	1.21531e-07	5.20727
GRG3	0.3% NaCl	S12_12268747	12	12268747	3.47558e-08	5.60366
GRG3	0.3% NaCl	S12_12270751	12	12270751	8.06521e-08	5.33731
GRG3	0.3% NaCl	S12_12271866	12	12271866	5.35025e-08	5.46727
GRG3	0.3% NaCl	S12_12274994	12	12274994	3.11811e-08	5.63794
GRG3	0.3% NaCl	S12_12277102	12	12277102	4.13471e-08	5.54878
GRG3	0.3% NaCl	S12_12279195	12	12279195	1.00934e-08	5.99337
GRG3	0.3% NaCl	S12_12280200	12	12280200	8.37393e-08	5.32541
GRG3	0.3% NaCl	S12_12296188	12	12296188	5.21973e-09	6.20047
GRG3	0.3% NaCl	S12_12298016	12	12298016	7.34943e-08	5.36676
GRG3	0.3% NaCl	S12_12309740	12	12309740	1.61513e-07	5.11695
GRG3	0.3% NaCl	S12_12314288	12	12314288	6.8646e-08	5.38838
GRG3	0.3% NaCl	S12_12316437	12	12316437	7.85924e-08	5.34551
GRG3	0.3% NaCl	S12_12318682	12	12318682	1.23423e-07	5.20237
GRG3	0.3% NaCl	S12_12321785	12	12321785	3.80209e-08	5.57529
GRG3	0.3% NaCl	S12_12325362	12	12325362	4.79075e-08	5.50222
GRG3	0.3% NaCl	S12_12327556	12	12327556	1.24648e-07	5.19923
GRG3	0.3% NaCl	S12_12328637	12	12328637	1.60647e-09	6.5693
GRG3	0.3% NaCl	S12_12329853	12	12329853	2.92838e-08	5.65776
GRG3	0.3% NaCl	S12_12351033	12	12351033	9.72037e-08	5.27814
GRG3	0.3% NaCl	S12_12353060	12	12353060	1.66676e-08	5.8355
GRG3	0.3% NaCl	S12_12354209	12	12354209	8.51901e-08	5.31996
GRG3	0.3% NaCl	S12_12356285	12	12356285	1.50874e-08	5.86687
GRG3	0.3% NaCl	S12_12361788	12	12361788	1.08594e-08	5.97037
GRG3	0.3% NaCl	S12_12392839	12	12392839	4.87776e-09	6.22173
GRG3	0.3% NaCl	S12_12394971	12	12394971	7.73579e-08	5.35053
GRG3	0.3% NaCl	S12_12396084	12	12396084	1.38535e-07	5.1657
GRG3	0.3% NaCl	S12_12397196	12	12397196	6.82991e-08	5.38998
GRG3	0.3% NaCl	S12_12398218	12	12398218	4.78285e-08	5.50274
GRG3	0.3% NaCl	S12_12400300	12	12400300	4.16131e-08	5.54676
GRG3	0.3% NaCl	S12_12405637	12	12405637	4.96992e-08	5.4906
GRG3	0.3% NaCl	S12_12406655	12	12406655	7.54902e-08	5.35827
GRG3	0.3% NaCl	S12_12407658	12	12407658	1.10849e-07	5.23647
GRG3	0.3% NaCl	S12_12414766	12	12414766	4.00826e-08	5.5586
GRG3	0.3% NaCl	S12_12420985	12	12420985	3.23915e-08	5.62591
GRG3	0.3% NaCl	S12_12424031	12	12424031	1.35172e-07	5.1735
GRG3	0.3% NaCl	S12_12427075	12	12427075	1.04774e-07	5.25435
GRG3	0.3% NaCl	S12_12432287	12	12432287	1.84676e-08	5.80318
GRG3	0.3% NaCl	S12_12441066	12	12441066	2.94149e-08	5.65635
GRG3	0.3% NaCl	S12_12490108	12	12490108	7.24474e-09	6.09758
GRG3	0.3% NaCl	S12_12491156	12	12491156	2.10469e-08	5.76197
GRG3	0.3% NaCl	S12_12505787	12	12505787	5.90722e-08	5.43593
GRG3	0.3% NaCl	S12_12580179	12	12580179	6.35832e-08	5.41264
GRG3	0.3% NaCl	S12_12597538	12	12597538	1.1039e-07	5.23778
GRG3	0.3% NaCl	S12_12610936	12	12610936	1.71357e-08	5.82677
GRG3	0.3% NaCl	S12_12624228	12	12624228	1.887e-08	5.79639
GRG3	0.3% NaCl	S12_12625258	12	12625258	8.43021e-09	6.04997
GRG3	0.3% NaCl	S12_12626265	12	12626265	9.66324e-09	6.00706
GRG3	0.3% NaCl	S12_12627318	12	12627318	3.88355e-09	6.29318
GRG3	0.3% NaCl	S12_12634558	12	12634558	6.30657e-08	5.41522
GRG3	0.3% NaCl	S12_12703399	12	12703399	8.27482e-08	5.32918
GRG3	0.3% NaCl	S12_12710670	12	12710670	3.24887e-08	5.62497
GRG3	0.3% NaCl	S12_12716828	12	12716828	9.80822e-09	6.00238
GRG3	0.3% NaCl	S12_12757400	12	12757400	3.179e-08	5.63183
GRG3	0.3% NaCl	S12_12764975	12	12764975	7.05758e-08	5.37959
GRG3	0.3% NaCl	S12_12784653	12	12784653	1.04583e-07	5.25493
GRG3	0.3% NaCl	S12_12792725	12	12792725	2.0488e-08	5.77046
GRG3	0.3% NaCl	S12_12815714	12	12815714	1.61881e-07	5.11623
GRG3	0.3% NaCl	S12_12838375	12	12838375	1.12019e-08	5.9606
GRG3	0.3% NaCl	S12_12841526	12	12841526	6.40069e-09	6.13647
GRG3	0.3% NaCl	S12_12854698	12	12854698	1.1501e-07	5.22478
GRG3	0.3% NaCl	S12_12857861	12	12857861	5.68592e-09	6.17364
GRG3	0.3% NaCl	S12_12860907	12	12860907	2.27174e-08	5.73788
GRG3	0.3% NaCl	S12_12861933	12	12861933	3.59365e-08	5.59311
GRG3	0.3% NaCl	S12_12864987	12	12864987	6.40595e-08	5.41027
GRG3	0.3% NaCl	S12_12881698	12	12881698	1.34477e-07	5.17514
GRG3	0.3% NaCl	S12_12886862	12	12886862	7.66987e-08	5.35324
GRG3	0.3% NaCl	S12_12903669	12	12903669	9.83904e-08	5.27429
GRG3	0.3% NaCl	S12_15760692	12	15760692	2.2875e-08	5.7357
GRG3	0.3% NaCl	S12_15764841	12	15764841	1.0288e-08	5.98736
GRG3	0.3% NaCl	S12_16211889	12	16211889	1.90248e-08	5.79382
GRG3	0.3% NaCl	S12_18371817	12	18371817	2.38391e-08	5.72268
GRG3	0.3% NaCl	S12_18392203	12	18392203	4.95904e-08	5.4913
GRG3	0.3% NaCl	S12_22652972	12	22652972	4.131e-10	6.99236
GRG3	0.3% NaCl	S12_24161838	12	24161838	7.56357e-08	5.35766
GRG3	0.3% NaCl	S12_24179491	12	24179491	9.31796e-08	5.29154
GRG3	0.3% NaCl	S12_24187787	12	24187787	3.03955e-08	5.646
GRG3	0.3% NaCl	S12_24193433	12	24193433	8.82665e-08	5.30872
GRG3	0.3% NaCl	S12_24197215	12	24197215	8.73338e-08	5.31209
GRG3	0.3% NaCl	S12_24198885	12	24198885	7.99071e-09	6.06679
GRG3	0.3% NaCl	S12_24200128	12	24200128	1.24514e-08	5.92732
GRG3	0.3% NaCl	S12_24201553	12	24201553	5.09075e-08	5.483
GRG3	0.3% NaCl	S12_24204818	12	24204818	4.03233e-08	5.55671
GRG3	0.3% NaCl	S12_24212391	12	24212391	5.11605e-09	6.20677
GRG3	0.3% NaCl	S12_24214108	12	24214108	2.37326e-08	5.72409
GRG3	0.3% NaCl	S12_24215478	12	24215478	2.02625e-08	5.77395
GRG3	0.3% NaCl	S12_24217058	12	24217058	3.5631e-08	5.5958
GRG3	0.3% NaCl	S12_24218638	12	24218638	1.83535e-08	5.80514
GRG3	0.3% NaCl	S12_24219881	12	24219881	2.5445e-08	5.70211
GRG3	0.3% NaCl	S12_24222241	12	24222241	4.60651e-08	5.51462
GRG3	0.3% NaCl	S12_24231578	12	24231578	4.75885e-09	6.22947
GRG3	0.3% NaCl	S12_24232635	12	24232635	2.59463e-08	5.69596
GRG3	0.3% NaCl	S12_24234648	12	24234648	4.85325e-08	5.49812
GRG3	0.3% NaCl	S12_24238434	12	24238434	7.40518e-08	5.36436
GRG3	0.3% NaCl	S12_24241637	12	24241637	1.63708e-07	5.11267
GRG3	0.3% NaCl	S12_24463902	12	24463902	5.46e-08	5.46085
GRG3	0.3% NaCl	S12_25490919	12	25490919	1.42466e-09	6.6068
GRG3	0.3% NaCl	S12_25493096	12	25493096	6.77651e-09	6.11856
GRG3	0.3% NaCl	S12_25494160	12	25494160	2.5823e-09	6.42094
GRG3	0.3% NaCl	S12_25495183	12	25495183	1.20717e-08	5.93707
GRG3	0.3% NaCl	S12_25496236	12	25496236	1.00552e-08	5.99456
GRG3	0.3% NaCl	S12_25497648	12	25497648	2.86849e-09	6.38805
GRG3	0.3% NaCl	S12_25500839	12	25500839	9.70913e-10	6.72641
GRG3	0.3% NaCl	S12_26988599	12	26988599	4.38538e-08	5.53018
GRG3	0.3% NaCl	S12_27007864	12	27007864	9.8338e-08	5.27446
GRG3	0.5% NaCl	S01_3909	1	3909	1.12873e-07	5.27687
GRG3	0.5% NaCl	S01_69126	1	69126	1.41556e-07	5.20436
GRG3	0.5% NaCl	S01_84528	1	84528	5.5581e-08	5.50334
GRG3	0.5% NaCl	S01_149773	1	149773	9.39013e-08	5.33576
GRG3	0.5% NaCl	S01_483144	1	483144	2.38045e-08	5.77363
GRG3	0.5% NaCl	S01_539828	1	539828	2.14214e-09	6.53654
GRG3	0.5% NaCl	S01_552576	1	552576	6.19435e-09	6.20098
GRG3	0.5% NaCl	S01_557999	1	557999	5.83016e-09	6.22017
GRG3	0.5% NaCl	S01_565929	1	565929	1.3255e-08	5.95976
GRG3	0.5% NaCl	S01_568861	1	568861	1.0052e-07	5.31396
GRG3	0.5% NaCl	S01_571190	1	571190	4.0873e-09	6.33253
GRG3	0.5% NaCl	S01_573310	1	573310	2.21175e-09	6.52646
GRG3	0.5% NaCl	S01_575506	1	575506	6.99094e-09	6.16267
GRG3	0.5% NaCl	S01_579974	1	579974	1.61619e-07	5.16189
GRG3	0.5% NaCl	S01_582253	1	582253	6.16489e-09	6.20249
GRG3	0.5% NaCl	S01_583343	1	583343	1.74631e-08	5.87216
GRG3	0.5% NaCl	S01_586606	1	586606	7.41829e-09	6.14387
GRG3	0.5% NaCl	S01_590848	1	590848	8.22144e-09	6.11129
GRG3	0.5% NaCl	S01_591906	1	591906	6.78928e-09	6.17194
GRG3	0.5% NaCl	S01_592932	1	592932	4.25695e-09	6.31967
GRG3	0.5% NaCl	S01_594957	1	594957	1.59992e-08	5.89998
GRG3	0.5% NaCl	S01_598185	1	598185	5.14954e-08	5.52771
GRG3	0.5% NaCl	S01_599196	1	599196	1.50074e-08	5.92032
GRG3	0.5% NaCl	S01_600208	1	600208	2.36426e-09	6.50542
GRG3	0.5% NaCl	S01_601216	1	601216	1.51126e-09	6.6465
GRG3	0.5% NaCl	S01_602284	1	602284	7.43889e-09	6.14299
GRG3	0.5% NaCl	S01_603291	1	603291	1.73729e-08	5.8738
GRG3	0.5% NaCl	S01_605400	1	605400	1.69637e-08	5.88138
GRG3	0.5% NaCl	S01_608464	1	608464	5.34678e-08	5.51571
GRG3	0.5% NaCl	S01_611530	1	611530	4.27201e-09	6.31855
GRG3	0.5% NaCl	S01_613637	1	613637	1.20717e-07	5.25536
GRG3	0.5% NaCl	S01_621088	1	621088	9.45612e-09	6.06693
GRG3	0.5% NaCl	S01_622119	1	622119	1.31961e-08	5.96117
GRG3	0.5% NaCl	S01_623224	1	623224	1.01617e-09	6.77142
GRG3	0.5% NaCl	S01_635430	1	635430	2.48173e-08	5.76037
GRG3	0.5% NaCl	S01_636452	1	636452	1.26478e-08	5.97464
GRG3	0.5% NaCl	S01_637521	1	637521	1.36772e-08	5.9498
GRG3	0.5% NaCl	S01_642023	1	642023	1.37198e-07	5.21438
GRG3	0.5% NaCl	S01_646269	1	646269	7.07102e-08	5.42644
GRG3	0.5% NaCl	S01_655590	1	655590	1.13549e-07	5.27496
GRG3	0.5% NaCl	S01_720950	1	720950	8.82176e-10	6.81588
GRG3	0.5% NaCl	S01_725411	1	725411	3.36832e-09	6.39367
GRG3	0.5% NaCl	S01_740034	1	740034	1.37333e-10	7.39854
GRG3	0.5% NaCl	S01_745182	1	745182	8.94472e-10	6.81153
GRG3	0.5% NaCl	S01_767727	1	767727	2.51213e-08	5.12129
GRG3	0.5% NaCl	S01_789608	1	789608	1.32186e-07	5.2263
GRG3	0.5% NaCl	S01_796438	1	796438	2.89056e-08	5.71181
GRG3	0.5% NaCl	S01_799736	1	799736	1.16185e-07	5.26761
GRG3	0.5% NaCl	S01_806240	1	806240	1.46008e-09	6.65735
GRG3	0.5% NaCl	S01_811986	1	811986	3.97233e-08	5.61051
GRG3	0.5% NaCl	S01_836581	1	836581	1.30465e-08	5.96479
GRG3	0.5% NaCl	S01_843817	1	843817	4.14538e-08	4.96549
GRG3	0.5% NaCl	S01_1015719	1	1015719	5.25672e-08	5.52113
GRG3	0.5% NaCl	S01_1031643	1	1031643	1.03312e-07	5.3052
GRG3	0.5% NaCl	S01_1049575	1	1049575	1.38856e-07	5.21053
GRG3	0.5% NaCl	S01_1053703	1	1053703	5.38986e-08	5.51315
GRG3	0.5% NaCl	S01_1054704	1	1054704	1.93533e-09	6.56856
GRG3	0.5% NaCl	S01_1061364	1	1061364	1.68159e-08	5.88416
GRG3	0.5% NaCl	S01_1084491	1	1084491	3.49031e-08	5.65175
GRG3	0.5% NaCl	S01_1207826	1	1207826	4.83141e-08	5.54806
GRG3	0.5% NaCl	S01_2109453	1	2109453	6.83375e-09	6.16987
GRG3	0.5% NaCl	S01_2162547	1	2162547	4.47649e-08	5.5724
GRG3	0.5% NaCl	S01_4674342	1	4674342	2.74993e-08	5.7277
GRG3	0.5% NaCl	S01_4698931	1	4698931	4.27986e-08	5.58673
GRG3	0.5% NaCl	S01_4974545	1	4974545	1.1423e-07	5.27305
GRG3	0.5% NaCl	S01_5225693	1	5225693	2.67574e-08	5.7364
GRG3	0.5% NaCl	S01_5228885	1	5228885	4.72492e-09	6.28668
GRG3	0.5% NaCl	S01_5242286	1	5242286	6.72121e-08	5.44265
GRG3	0.5% NaCl	S01_5248887	1	5248887	3.63953e-12	8.52423
GRG3	0.5% NaCl	S01_5258130	1	5258130	1.15924e-08	6.0023
GRG3	0.5% NaCl	S01_5262583	1	5262583	9.34252e-11	7.51871
GRG3	0.5% NaCl	S01_5265228	1	5265228	6.51432e-10	6.91115
GRG3	0.5% NaCl	S01_5361446	1	5361446	8.22508e-08	5.37812
GRG3	0.5% NaCl	S01_5480839	1	5480839	1.09848e-07	5.28557
GRG3	0.5% NaCl	S01_5494532	1	5494532	5.96569e-10	6.93877
GRG3	0.5% NaCl	S01_5517983	1	5517983	6.08466e-08	5.47444
GRG3	0.5% NaCl	S01_5521255	1	5521255	3.98084e-09	6.34087
GRG3	0.5% NaCl	S01_5525541	1	5525541	3.97961e-08	5.60993
GRG3	0.5% NaCl	S01_5530385	1	5530385	3.04395e-08	5.69534
GRG3	0.5% NaCl	S01_5583071	1	5583071	1.48058e-07	5.18997
GRG3	0.5% NaCl	S01_5668876	1	5668876	8.73536e-08	5.35887
GRG3	0.5% NaCl	S01_5709636	1	5709636	8.70245e-09	6.09326
GRG3	0.5% NaCl	S01_5733632	1	5733632	1.54563e-07	5.17619
GRG3	0.5% NaCl	S01_6437513	1	6437513	7.73294e-08	5.39784
GRG3	0.5% NaCl	S01_6458200	1	6458200	3.81626e-08	5.62329
GRG3	0.5% NaCl	S01_6463552	1	6463552	2.78577e-08	5.72357
GRG3	0.5% NaCl	S01_6562399	1	6562399	5.45442e-08	5.50935
GRG3	0.5% NaCl	S01_17639605	1	17639605	1.35405e-07	5.21859
GRG3	0.5% NaCl	S01_26117239	1	26117239	1.04139e-07	5.30265
GRG3	0.5% NaCl	S01_31332419	1	31332419	8.21949e-08	5.37834
GRG3	0.5% NaCl	S01_31346665	1	31346665	5.59604e-08	5.50117
GRG3	0.5% NaCl	S01_31347695	1	31347695	1.4326e-07	5.20052
GRG3	0.5% NaCl	S01_31363886	1	31363886	5.65189e-08	5.498
GRG3	0.5% NaCl	S01_31393420	1	31393420	7.35845e-09	6.14643
GRG3	0.5% NaCl	S01_31623141	1	31623141	1.22061e-07	5.25182
GRG3	0.5% NaCl	S01_31681697	1	31681697	8.88071e-08	5.3536
GRG3	0.5% NaCl	S01_31911495	1	31911495	9.26205e-10	6.80057
GRG3	0.5% NaCl	S01_31946023	1	31946023	3.46721e-08	5.65386
GRG3	0.5% NaCl	S01_39044100	1	39044100	1.72493e-08	5.87607
GRG3	0.5% NaCl	S01_39045140	1	39045140	7.07236e-08	5.42638
GRG3	0.5% NaCl	S01_39051021	1	39051021	4.32742e-08	5.58321
GRG3	0.5% NaCl	S01_39054559	1	39054559	5.22066e-08	5.52333
GRG3	0.5% NaCl	S01_40843803	1	40843803	8.22723e-09	6.11107
GRG3	0.5% NaCl	S01_43125020	1	43125020	1.19577e-08	5.99246
GRG3	0.5% NaCl	S02_3402148	2	3402148	1.89262e-08	5.84658
GRG3	0.5% NaCl	S02_5267457	2	5267457	1.06732e-10	7.47719
GRG3	0.5% NaCl	S02_6036137	2	6036137	1.60184e-08	5.26114
GRG3	0.5% NaCl	S02_11084743	2	11084743	7.00622e-08	5.42938
GRG3	0.5% NaCl	S02_11106803	2	11106803	1.55082e-07	5.17512
GRG3	0.5% NaCl	S02_11501662	2	11501662	3.0493e-08	5.69479
GRG3	0.5% NaCl	S02_12157324	2	12157324	6.45311e-08	4.8277
GRG3	0.5% NaCl	S02_16789426	2	16789426	6.37914e-08	4.83129
GRG3	0.5% NaCl	S03_1994800	3	1994800	1.01621e-07	5.31048
GRG3	0.5% NaCl	S03_3810624	3	3810624	6.16214e-08	5.47039
GRG3	0.5% NaCl	S03_6068875	3	6068875	3.59214e-08	5.64258
GRG3	0.5% NaCl	S03_6112411	3	6112411	6.73598e-10	6.90064
GRG3	0.5% NaCl	S03_6114578	3	6114578	1.36644e-10	7.40011
GRG3	0.5% NaCl	S03_6116986	3	6116986	1.87463e-09	6.5786
GRG3	0.5% NaCl	S03_6118589	3	6118589	1.47082e-10	7.37713
GRG3	0.5% NaCl	S03_6127427	3	6127427	9.22537e-10	6.80182
GRG3	0.5% NaCl	S03_6128953	3	6128953	5.61948e-09	6.23182
GRG3	0.5% NaCl	S03_6130204	3	6130204	4.04497e-09	6.33582
GRG3	0.5% NaCl	S03_6137316	3	6137316	1.28187e-08	5.97038
GRG3	0.5% NaCl	S03_6160133	3	6160133	2.14434e-10	7.25932
GRG3	0.5% NaCl	S03_6168121	3	6168121	3.68363e-08	5.63456
GRG3	0.5% NaCl	S03_6174429	3	6174429	1.13425e-07	5.27531
GRG3	0.5% NaCl	S03_6176942	3	6176942	1.49303e-07	5.18729
GRG3	0.5% NaCl	S03_6215194	3	6215194	1.15537e-07	5.2694
GRG3	0.5% NaCl	S03_6266862	3	6266862	4.13036e-08	5.59807
GRG3	0.5% NaCl	S03_6290316	3	6290316	4.6012e-08	5.56364
GRG3	0.5% NaCl	S03_6312907	3	6312907	1.23472e-07	5.24814
GRG3	0.5% NaCl	S03_6328119	3	6328119	1.205e-07	5.25594
GRG3	0.5% NaCl	S03_6334555	3	6334555	2.73478e-08	5.72946
GRG3	0.5% NaCl	S03_6359145	3	6359145	4.65359e-08	5.56002
GRG3	0.5% NaCl	S03_6361679	3	6361679	1.19199e-07	5.25941
GRG3	0.5% NaCl	S03_6364673	3	6364673	3.39954e-08	5.66014
GRG3	0.5% NaCl	S03_6366944	3	6366944	8.68638e-09	6.09385
GRG3	0.5% NaCl	S03_6402001	3	6402001	2.75412e-10	7.18103
GRG3	0.5% NaCl	S03_6412110	3	6412110	4.00862e-09	6.33867
GRG3	0.5% NaCl	S03_6415288	3	6415288	1.79984e-09	6.59144
GRG3	0.5% NaCl	S03_6431142	3	6431142	4.69939e-08	5.5569
GRG3	0.5% NaCl	S03_6465666	3	6465666	1.56058e-07	5.17311
GRG3	0.5% NaCl	S03_6475320	3	6475320	1.41544e-07	5.20439
GRG3	0.5% NaCl	S03_6482462	3	6482462	1.10152e-07	5.28468
GRG3	0.5% NaCl	S03_6485128	3	6485128	2.37403e-08	5.77449
GRG3	0.5% NaCl	S03_6493521	3	6493521	2.9515e-08	5.70517
GRG3	0.5% NaCl	S03_6498202	3	6498202	2.99749e-09	6.43051
GRG3	0.5% NaCl	S03_6541651	3	6541651	1.14975e-07	5.27096
GRG3	0.5% NaCl	S03_6542672	3	6542672	2.55878e-08	5.75063
GRG3	0.5% NaCl	S03_6710706	3	6710706	3.48615e-08	5.65213
GRG3	0.5% NaCl	S03_12015335	3	12015335	6.25599e-13	9.06474
GRG3	0.5% NaCl	S03_15570142	3	15570142	2.02944e-08	5.82438
GRG3	0.5% NaCl	S03_15829265	3	15829265	1.9741e-08	5.83317
GRG3	0.5% NaCl	S03_16213529	3	16213529	2.68445e-08	5.73537
GRG3	0.5% NaCl	S03_16249395	3	16249395	5.08733e-10	6.98874
GRG3	0.5% NaCl	S03_16260232	3	16260232	2.29582e-08	5.78515
GRG3	0.5% NaCl	S03_16262350	3	16262350	7.49235e-08	5.40795
GRG3	0.5% NaCl	S03_16275313	3	16275313	2.23325e-08	5.79394
GRG3	0.5% NaCl	S03_16285485	3	16285485	1.81208e-08	5.8604
GRG3	0.5% NaCl	S03_16286694	3	16286694	5.38157e-11	7.69048
GRG3	0.5% NaCl	S03_16321491	3	16321491	1.42461e-07	5.20232
GRG3	0.5% NaCl	S03_16663167	3	16663167	2.31053e-10	7.23598
GRG3	0.5% NaCl	S03_16665384	3	16665384	7.88622e-09	6.12448
GRG3	0.5% NaCl	S03_16666490	3	16666490	7.59123e-10	6.86309
GRG3	0.5% NaCl	S03_16667599	3	16667599	4.36507e-10	7.03676
GRG3	0.5% NaCl	S03_16668618	3	16668618	4.69656e-11	7.73282
GRG3	0.5% NaCl	S03_16669731	3	16669731	6.19062e-10	6.92715
GRG3	0.5% NaCl	S03_16670753	3	16670753	1.93816e-10	7.29093
GRG3	0.5% NaCl	S03_16676240	3	16676240	3.55889e-09	6.37628
GRG3	0.5% NaCl	S03_16681403	3	16681403	3.32318e-09	6.39793
GRG3	0.5% NaCl	S03_16682467	3	16682467	5.85634e-12	8.37761
GRG3	0.5% NaCl	S03_16683467	3	16683467	5.13276e-13	9.12526
GRG3	0.5% NaCl	S03_16686565	3	16686565	4.58321e-11	7.74042
GRG3	0.5% NaCl	S03_16687589	3	16687589	7.88795e-12	8.28568
GRG3	0.5% NaCl	S03_16688630	3	16688630	3.92681e-10	7.06993
GRG3	0.5% NaCl	S03_16689717	3	16689717	3.27028e-11	7.84529
GRG3	0.5% NaCl	S03_16692988	3	16692988	4.12263e-10	7.05468
GRG3	0.5% NaCl	S03_16693989	3	16693989	3.29349e-13	9.26079
GRG3	0.5% NaCl	S03_16694993	3	16694993	3.79342e-12	8.51148
GRG3	0.5% NaCl	S03_16696465	3	16696465	3.99938e-12	8.49519
GRG3	0.5% NaCl	S03_16697605	3	16697605	1.11761e-10	7.46283
GRG3	0.5% NaCl	S03_16699913	3	16699913	1.60876e-11	8.06527
GRG3	0.5% NaCl	S03_16702037	3	16702037	2.8279e-12	8.6019
GRG3	0.5% NaCl	S03_16703094	3	16703094	1.16946e-10	7.44869
GRG3	0.5% NaCl	S03_16705165	3	16705165	6.98981e-09	6.16272
GRG3	0.5% NaCl	S03_16707227	3	16707227	7.38828e-12	8.30589
GRG3	0.5% NaCl	S03_16708413	3	16708413	4.19704e-10	7.04907
GRG3	0.5% NaCl	S03_16711541	3	16711541	8.62396e-09	6.09614
GRG3	0.5% NaCl	S03_16712610	3	16712610	5.51363e-10	6.9635
GRG3	0.5% NaCl	S03_16713630	3	16713630	3.51842e-10	7.10434
GRG3	0.5% NaCl	S03_16714641	3	16714641	4.41951e-10	7.03288
GRG3	0.5% NaCl	S03_16716976	3	16716976	2.59429e-12	8.62842
GRG3	0.5% NaCl	S03_16718007	3	16718007	1.59026e-11	8.06885
GRG3	0.5% NaCl	S03_16720103	3	16720103	4.00255e-13	9.20126
GRG3	0.5% NaCl	S03_16722132	3	16722132	1.90044e-11	8.01365
GRG3	0.5% NaCl	S03_16724241	3	16724241	1.14108e-08	6.00731
GRG3	0.5% NaCl	S03_16727363	3	16727363	1.85887e-13	9.43518
GRG3	0.5% NaCl	S03_16728414	3	16728414	9.39899e-13	8.94011
GRG3	0.5% NaCl	S03_16729492	3	16729492	1.81021e-12	8.73903
GRG3	0.5% NaCl	S03_16732192	3	16732192	2.12931e-09	6.53844
GRG3	0.5% NaCl	S03_16733441	3	16733441	2.67357e-12	8.61916
GRG3	0.5% NaCl	S03_16735605	3	16735605	4.23166e-12	8.4778
GRG3	0.5% NaCl	S03_16737624	3	16737624	6.58048e-10	6.90797
GRG3	0.5% NaCl	S03_16739696	3	16739696	3.23569e-10	7.13058
GRG3	0.5% NaCl	S03_16743894	3	16743894	9.87922e-11	7.5013
GRG3	0.5% NaCl	S03_16747053	3	16747053	1.31266e-08	5.96285
GRG3	0.5% NaCl	S03_16749170	3	16749170	1.97322e-09	6.56244
GRG3	0.5% NaCl	S03_16751279	3	16751279	9.32611e-09	6.07132
GRG3	0.5% NaCl	S03_16753383	3	16753383	9.4059e-11	7.51661
GRG3	0.5% NaCl	S03_16754424	3	16754424	6.34889e-09	6.19318
GRG3	0.5% NaCl	S03_16756838	3	16756838	6.24107e-08	5.46633
GRG3	0.5% NaCl	S03_16757893	3	16757893	4.0735e-08	5.60249
GRG3	0.5% NaCl	S03_16759978	3	16759978	1.90211e-08	5.84499
GRG3	0.5% NaCl	S03_16762131	3	16762131	1.70066e-10	7.33178
GRG3	0.5% NaCl	S03_16770776	3	16770776	3.10419e-08	5.6891
GRG3	0.5% NaCl	S03_16777112	3	16777112	7.25611e-09	6.15087
GRG3	0.5% NaCl	S03_16778150	3	16778150	2.55246e-10	7.20482
GRG3	0.5% NaCl	S03_16782310	3	16782310	4.51738e-09	6.30089
GRG3	0.5% NaCl	S03_16783315	3	16783315	1.4765e-10	7.37592
GRG3	0.5% NaCl	S03_16785364	3	16785364	3.66032e-09	6.3674
GRG3	0.5% NaCl	S03_16787498	3	16787498	4.31992e-10	7.04002
GRG3	0.5% NaCl	S03_16788584	3	16788584	1.69569e-08	5.88151
GRG3	0.5% NaCl	S03_16792030	3	16792030	4.61096e-09	6.29441
GRG3	0.5% NaCl	S03_16793083	3	16793083	9.27016e-08	5.33987
GRG3	0.5% NaCl	S03_16795529	3	16795529	7.21089e-09	6.15285
GRG3	0.5% NaCl	S03_16796828	3	16796828	8.74458e-09	6.09173
GRG3	0.5% NaCl	S03_16798262	3	16798262	1.97355e-10	7.28527
GRG3	0.5% NaCl	S03_16800371	3	16800371	4.92951e-10	6.99863
GRG3	0.5% NaCl	S03_16801428	3	16801428	1.47037e-10	7.37722
GRG3	0.5% NaCl	S03_16803597	3	16803597	1.8386e-09	6.58472
GRG3	0.5% NaCl	S03_16805854	3	16805854	5.21059e-11	7.70052
GRG3	0.5% NaCl	S03_16807899	3	16807899	5.09187e-09	6.26302
GRG3	0.5% NaCl	S03_16809861	3	16809861	4.5604e-08	5.56648
GRG3	0.5% NaCl	S03_16813159	3	16813159	9.88737e-09	6.05278
GRG3	0.5% NaCl	S03_16817291	3	16817291	1.00204e-08	6.04854
GRG3	0.5% NaCl	S03_16818310	3	16818310	3.23472e-10	7.13067
GRG3	0.5% NaCl	S03_16825521	3	16825521	2.95323e-09	6.43521
GRG3	0.5% NaCl	S03_16827549	3	16827549	1.02184e-08	6.04234
GRG3	0.5% NaCl	S03_16828557	3	16828557	4.45373e-09	6.30538
GRG3	0.5% NaCl	S03_16829575	3	16829575	7.97266e-11	7.56813
GRG3	0.5% NaCl	S03_16835868	3	16835868	8.45372e-10	6.82928
GRG3	0.5% NaCl	S03_16837159	3	16837159	2.37552e-09	6.50392
GRG3	0.5% NaCl	S03_16839688	3	16839688	1.83962e-08	5.85561
GRG3	0.5% NaCl	S03_16840706	3	16840706	2.69067e-08	5.73463
GRG3	0.5% NaCl	S03_16841725	3	16841725	1.46831e-09	6.65558
GRG3	0.5% NaCl	S03_16842769	3	16842769	3.35196e-09	6.39521
GRG3	0.5% NaCl	S03_16843782	3	16843782	7.89025e-13	8.9937
GRG3	0.5% NaCl	S03_16844839	3	16844839	8.74944e-08	5.35836
GRG3	0.5% NaCl	S03_16845986	3	16845986	1.38516e-08	5.94577
GRG3	0.5% NaCl	S03_16851263	3	16851263	7.66631e-14	9.70448
GRG3	0.5% NaCl	S03_16855912	3	16855912	2.33239e-14	10.0649
GRG3	0.5% NaCl	S03_16856935	3	16856935	9.4145e-14	9.64211
GRG3	0.5% NaCl	S03_16858546	3	16858546	8.41151e-09	6.10404
GRG3	0.5% NaCl	S03_16859548	3	16859548	1.51126e-10	7.36866
GRG3	0.5% NaCl	S03_16861738	3	16861738	7.61434e-13	9.0046
GRG3	0.5% NaCl	S03_16864936	3	16864936	4.23589e-10	7.04618
GRG3	0.5% NaCl	S03_16866957	3	16866957	1.13454e-08	6.00914
GRG3	0.5% NaCl	S03_16871086	3	16871086	1.26045e-10	7.42531
GRG3	0.5% NaCl	S03_16873239	3	16873239	1.01798e-13	9.61836
GRG3	0.5% NaCl	S03_16874249	3	16874249	9.55112e-09	6.06376
GRG3	0.5% NaCl	S03_16876298	3	16876298	3.92475e-08	5.61435
GRG3	0.5% NaCl	S03_16877346	3	16877346	3.9922e-11	7.78333
GRG3	0.5% NaCl	S03_16878477	3	16878477	5.83399e-13	9.0861
GRG3	0.5% NaCl	S03_16879736	3	16879736	7.3693e-12	8.30669
GRG3	0.5% NaCl	S03_16881995	3	16881995	6.80364e-13	9.03906
GRG3	0.5% NaCl	S03_16884260	3	16884260	1.91023e-11	8.01206
GRG3	0.5% NaCl	S03_16885260	3	16885260	3.48572e-09	6.38285
GRG3	0.5% NaCl	S03_16886267	3	16886267	7.06248e-09	6.15944
GRG3	0.5% NaCl	S03_16887296	3	16887296	1.07934e-12	8.89771
GRG3	0.5% NaCl	S03_16888298	3	16888298	1.65476e-12	8.76661
GRG3	0.5% NaCl	S03_16889457	3	16889457	6.40232e-13	9.05767
GRG3	0.5% NaCl	S03_16890707	3	16890707	6.7576e-12	8.33344
GRG3	0.5% NaCl	S03_16891826	3	16891826	1.79799e-11	8.03082
GRG3	0.5% NaCl	S03_16892840	3	16892840	1.58652e-11	8.06958
GRG3	0.5% NaCl	S03_16893846	3	16893846	4.88385e-12	8.43362
GRG3	0.5% NaCl	S03_16898407	3	16898407	4.43468e-13	9.16994
GRG3	0.5% NaCl	S03_16902453	3	16902453	1.12235e-13	9.5887
GRG3	0.5% NaCl	S03_16904571	3	16904571	1.07607e-13	9.6015
GRG3	0.5% NaCl	S03_16906572	3	16906572	4.55898e-12	8.45484
GRG3	0.5% NaCl	S03_16907603	3	16907603	3.64277e-11	7.81179
GRG3	0.5% NaCl	S03_16908608	3	16908608	2.29648e-10	7.23788
GRG3	0.5% NaCl	S03_16909672	3	16909672	1.12119e-08	6.01289
GRG3	0.5% NaCl	S03_16912723	3	16912723	1.62399e-10	7.34619
GRG3	0.5% NaCl	S03_16913725	3	16913725	4.24932e-11	7.76393
GRG3	0.5% NaCl	S03_16914736	3	16914736	2.87299e-11	7.88549
GRG3	0.5% NaCl	S03_16915873	3	16915873	8.66443e-12	8.25668
GRG3	0.5% NaCl	S03_16918503	3	16918503	1.36195e-13	9.52986
GRG3	0.5% NaCl	S03_16920011	3	16920011	6.30233e-13	9.06248
GRG3	0.5% NaCl	S03_16921021	3	16921021	9.62213e-13	8.93292
GRG3	0.5% NaCl	S03_16922675	3	16922675	5.88686e-10	6.94294
GRG3	0.5% NaCl	S03_16926273	3	16926273	5.30304e-11	7.69505
GRG3	0.5% NaCl	S03_16927306	3	16927306	3.89022e-13	9.20995
GRG3	0.5% NaCl	S03_16928389	3	16928389	2.39603e-11	7.94181
GRG3	0.5% NaCl	S03_16929623	3	16929623	2.8799e-08	5.71299
GRG3	0.5% NaCl	S03_16930918	3	16930918	1.16069e-10	7.45104
GRG3	0.5% NaCl	S03_16936283	3	16936283	1.64689e-10	7.34181
GRG3	0.5% NaCl	S03_16939884	3	16939884	2.83625e-11	7.88949
GRG3	0.5% NaCl	S03_16941017	3	16941017	2.34314e-13	9.36464
GRG3	0.5% NaCl	S03_16942221	3	16942221	1.82248e-10	7.31016
GRG3	0.5% NaCl	S03_16943276	3	16943276	7.07137e-10	6.88538
GRG3	0.5% NaCl	S03_16946058	3	16946058	6.99894e-11	7.6087
GRG3	0.5% NaCl	S03_16947842	3	16947842	5.70825e-11	7.67215
GRG3	0.5% NaCl	S03_16948934	3	16948934	6.27509e-12	8.3563
GRG3	0.5% NaCl	S03_16950009	3	16950009	1.809e-09	6.58983
GRG3	0.5% NaCl	S03_16952912	3	16952912	4.73627e-12	8.44307
GRG3	0.5% NaCl	S03_16954242	3	16954242	1.24642e-11	8.14425
GRG3	0.5% NaCl	S03_16956497	3	16956497	1.59048e-09	6.6304
GRG3	0.5% NaCl	S03_16958511	3	16958511	3.15029e-08	5.68441
GRG3	0.5% NaCl	S03_16960560	3	16960560	9.39948e-11	7.51682
GRG3	0.5% NaCl	S03_16961601	3	16961601	3.5766e-12	8.5296
GRG3	0.5% NaCl	S03_16963623	3	16963623	1.62319e-11	8.0625
GRG3	0.5% NaCl	S03_16964626	3	16964626	2.41018e-14	10.055
GRG3	0.5% NaCl	S03_16967089	3	16967089	3.81227e-09	6.35455
GRG3	0.5% NaCl	S03_16969178	3	16969178	1.66774e-09	6.61546
GRG3	0.5% NaCl	S03_16970424	3	16970424	7.22121e-10	6.87879
GRG3	0.5% NaCl	S03_16971462	3	16971462	5.56958e-08	5.50268
GRG3	0.5% NaCl	S03_16972738	3	16972738	5.06262e-09	6.26484
GRG3	0.5% NaCl	S03_16974745	3	16974745	1.31318e-09	6.69074
GRG3	0.5% NaCl	S03_16975973	3	16975973	2.36166e-10	7.22913
GRG3	0.5% NaCl	S03_16976998	3	16976998	6.57939e-09	6.18188
GRG3	0.5% NaCl	S03_16990579	3	16990579	1.3852e-09	6.67393
GRG3	0.5% NaCl	S03_16991596	3	16991596	1.29883e-11	8.13151
GRG3	0.5% NaCl	S03_16992621	3	16992621	9.81519e-10	6.78233
GRG3	0.5% NaCl	S03_16993651	3	16993651	4.32487e-10	7.03967
GRG3	0.5% NaCl	S03_16994735	3	16994735	2.5501e-09	6.48154
GRG3	0.5% NaCl	S03_17006441	3	17006441	2.41746e-10	7.22183
GRG3	0.5% NaCl	S03_17007467	3	17007467	1.24249e-10	7.42979
GRG3	0.5% NaCl	S03_17008570	3	17008570	1.58465e-11	8.06994
GRG3	0.5% NaCl	S03_17013993	3	17013993	8.3903e-11	7.55222
GRG3	0.5% NaCl	S03_17186071	3	17186071	2.40136e-09	6.50051
GRG3	0.5% NaCl	S03_17285992	3	17285992	6.91107e-09	6.16631
GRG3	0.5% NaCl	S03_17360507	3	17360507	8.50128e-08	5.36756
GRG3	0.5% NaCl	S03_17713085	3	17713085	3.66621e-08	5.63608
GRG3	0.5% NaCl	S03_18273682	3	18273682	1.26725e-09	6.70195
GRG3	0.5% NaCl	S03_18541362	3	18541362	2.51641e-08	5.75595
GRG3	0.5% NaCl	S03_18578640	3	18578640	2.64725e-10	7.19341
GRG3	0.5% NaCl	S03_18733646	3	18733646	1.35097e-09	6.68181
GRG3	0.5% NaCl	S03_18868282	3	18868282	1.17971e-07	5.26273
GRG3	0.5% NaCl	S03_19129702	3	19129702	7.64837e-09	6.13419
GRG3	0.5% NaCl	S03_19434021	3	19434021	2.70259e-10	7.18694
GRG3	0.5% NaCl	S03_20075881	3	20075881	8.27756e-09	6.10913
GRG3	0.5% NaCl	S03_20691702	3	20691702	4.2632e-09	6.3192
GRG3	0.5% NaCl	S03_21104398	3	21104398	6.49617e-10	6.91202
GRG3	0.5% NaCl	S03_21140870	3	21140870	9.67936e-10	6.78672
GRG3	0.5% NaCl	S03_21190105	3	21190105	2.99082e-10	7.15522
GRG3	0.5% NaCl	S03_21191118	3	21191118	5.93459e-11	7.66005
GRG3	0.5% NaCl	S03_21428513	3	21428513	1.12924e-07	5.27673
GRG3	0.5% NaCl	S03_21442376	3	21442376	8.42579e-09	6.10351
GRG3	0.5% NaCl	S03_21580507	3	21580507	8.30136e-08	5.37517
GRG3	0.5% NaCl	S03_21995510	3	21995510	1.93788e-08	5.83906
GRG3	0.5% NaCl	S03_22537919	3	22537919	2.36615e-10	7.22854
GRG3	0.5% NaCl	S03_22550861	3	22550861	2.11725e-10	7.2633
GRG3	0.5% NaCl	S03_22554026	3	22554026	5.587e-09	6.23365
GRG3	0.5% NaCl	S03_22555035	3	22555035	2.47069e-11	7.9323
GRG3	0.5% NaCl	S03_22557043	3	22557043	9.0965e-08	5.34592
GRG3	0.5% NaCl	S03_22558070	3	22558070	2.09982e-09	6.54283
GRG3	0.5% NaCl	S03_22560180	3	22560180	3.65524e-10	7.09239
GRG3	0.5% NaCl	S03_22562190	3	22562190	1.28091e-10	7.42028
GRG3	0.5% NaCl	S03_22565233	3	22565233	1.61881e-08	5.89625
GRG3	0.5% NaCl	S03_22569993	3	22569993	1.43498e-09	6.66281
GRG3	0.5% NaCl	S03_22571020	3	22571020	8.22685e-08	5.37805
GRG3	0.5% NaCl	S03_22576593	3	22576593	3.3059e-11	7.84192
GRG3	0.5% NaCl	S03_22579767	3	22579767	9.48214e-09	6.06606
GRG3	0.5% NaCl	S03_22586082	3	22586082	1.70957e-12	8.7566
GRG3	0.5% NaCl	S03_22588103	3	22588103	3.47116e-12	8.53882
GRG3	0.5% NaCl	S03_22592784	3	22592784	5.6998e-11	7.67261
GRG3	0.5% NaCl	S03_22594871	3	22594871	2.05485e-10	7.27265
GRG3	0.5% NaCl	S03_22597109	3	22597109	4.26405e-13	9.18193
GRG3	0.5% NaCl	S03_22599555	3	22599555	4.26874e-12	8.47511
GRG3	0.5% NaCl	S03_22600688	3	22600688	4.09118e-11	7.77572
GRG3	0.5% NaCl	S03_22601728	3	22601728	3.06886e-08	5.69275
GRG3	0.5% NaCl	S03_22604015	3	22604015	4.25602e-10	7.0447
GRG3	0.5% NaCl	S03_22605038	3	22605038	2.84685e-09	6.44679
GRG3	0.5% NaCl	S03_22609322	3	22609322	8.06953e-11	7.56436
GRG3	0.5% NaCl	S03_22614759	3	22614759	3.54307e-11	7.82041
GRG3	0.5% NaCl	S03_22618083	3	22618083	2.70467e-12	8.61561
GRG3	0.5% NaCl	S03_22622702	3	22622702	4.80368e-10	7.00674
GRG3	0.5% NaCl	S03_22623818	3	22623818	6.55184e-09	6.18321
GRG3	0.5% NaCl	S03_22629156	3	22629156	7.67834e-11	7.57984
GRG3	0.5% NaCl	S03_22631310	3	22631310	8.02528e-09	6.11894
GRG3	0.5% NaCl	S03_22632415	3	22632415	7.05057e-12	8.32034
GRG3	0.5% NaCl	S03_22633458	3	22633458	5.49027e-08	5.50726
GRG3	0.5% NaCl	S03_22635673	3	22635673	1.40179e-10	7.39213
GRG3	0.5% NaCl	S03_22636710	3	22636710	9.65134e-10	6.78763
GRG3	0.5% NaCl	S03_22638920	3	22638920	1.96988e-08	5.83385
GRG3	0.5% NaCl	S03_22641086	3	22641086	3.27476e-08	5.67206
GRG3	0.5% NaCl	S03_22642104	3	22642104	7.71883e-09	6.13128
GRG3	0.5% NaCl	S03_22643319	3	22643319	1.59861e-09	6.6288
GRG3	0.5% NaCl	S03_22644391	3	22644391	2.29684e-08	5.785
GRG3	0.5% NaCl	S03_22645409	3	22645409	5.59285e-08	5.50135
GRG3	0.5% NaCl	S03_22646500	3	22646500	4.27824e-11	7.76182
GRG3	0.5% NaCl	S03_22657309	3	22657309	3.26388e-10	7.12786
GRG3	0.5% NaCl	S03_22661690	3	22661690	6.39108e-08	5.45874
GRG3	0.5% NaCl	S03_22662807	3	22662807	9.22975e-10	6.80167
GRG3	0.5% NaCl	S03_22663842	3	22663842	1.2272e-09	6.71205
GRG3	0.5% NaCl	S03_22671128	3	22671128	3.35328e-08	5.66451
GRG3	0.5% NaCl	S03_22674306	3	22674306	2.1226e-09	6.53943
GRG3	0.5% NaCl	S03_22675337	3	22675337	6.00847e-08	5.47846
GRG3	0.5% NaCl	S03_22676421	3	22676421	2.48003e-09	6.49034
GRG3	0.5% NaCl	S03_22677477	3	22677477	4.42589e-09	6.30736
GRG3	0.5% NaCl	S03_22679536	3	22679536	1.21655e-08	5.98699
GRG3	0.5% NaCl	S03_22680536	3	22680536	2.53872e-09	6.48295
GRG3	0.5% NaCl	S03_22681566	3	22681566	2.59278e-09	6.4763
GRG3	0.5% NaCl	S03_22694707	3	22694707	5.25666e-09	6.25294
GRG3	0.5% NaCl	S03_22943225	3	22943225	5.32454e-09	6.24888
GRG3	0.5% NaCl	S03_23751583	3	23751583	2.69141e-08	5.73455
GRG3	0.5% NaCl	S03_24466327	3	24466327	5.44481e-08	5.50991
GRG3	0.5% NaCl	S03_24479544	3	24479544	7.38619e-12	8.30598
GRG3	0.5% NaCl	S03_24484742	3	24484742	1.13222e-08	6.00979
GRG3	0.5% NaCl	S03_24496859	3	24496859	3.76888e-08	5.62727
GRG3	0.5% NaCl	S03_24622017	3	24622017	7.5364e-09	6.13886
GRG3	0.5% NaCl	S03_24635801	3	24635801	1.02885e-07	5.30652
GRG3	0.5% NaCl	S03_24639135	3	24639135	6.32332e-09	6.19446
GRG3	0.5% NaCl	S03_24643638	3	24643638	6.76175e-08	5.44073
GRG3	0.5% NaCl	S03_24702079	3	24702079	7.9809e-08	5.38775
GRG3	0.5% NaCl	S03_25165431	3	25165431	1.68784e-08	5.88298
GRG3	0.5% NaCl	S03_25980334	3	25980334	4.36421e-08	5.5805
GRG3	0.5% NaCl	S03_25982575	3	25982575	3.7939e-08	5.62516
GRG3	0.5% NaCl	S03_25984756	3	25984756	9.33734e-08	5.33756
GRG3	0.5% NaCl	S03_25985862	3	25985862	4.30993e-08	5.5845
GRG3	0.5% NaCl	S03_25986963	3	25986963	5.67612e-08	5.49663
GRG3	0.5% NaCl	S03_25988119	3	25988119	5.52957e-08	5.50498
GRG3	0.5% NaCl	S03_25990425	3	25990425	5.98332e-08	5.4798
GRG3	0.5% NaCl	S03_25991750	3	25991750	4.45023e-08	5.57428
GRG3	0.5% NaCl	S03_25992908	3	25992908	1.06591e-07	5.2952
GRG3	0.5% NaCl	S03_25994248	3	25994248	5.90094e-08	5.48423
GRG3	0.5% NaCl	S03_26000609	3	26000609	5.8213e-08	5.48857
GRG3	0.5% NaCl	S03_26003811	3	26003811	8.48155e-08	5.3683
GRG3	0.5% NaCl	S03_26006029	3	26006029	3.79686e-08	5.62491
GRG3	0.5% NaCl	S03_26009175	3	26009175	4.24629e-08	5.58924
GRG3	0.5% NaCl	S03_26019837	3	26019837	6.45562e-09	6.1879
GRG3	0.5% NaCl	S03_26022955	3	26022955	5.91463e-08	5.48349
GRG3	0.5% NaCl	S03_26025055	3	26025055	5.03697e-08	5.53476
GRG3	0.5% NaCl	S03_26027307	3	26027307	1.39833e-07	5.20828
GRG3	0.5% NaCl	S03_26031695	3	26031695	1.63198e-07	5.15877
GRG3	0.5% NaCl	S03_26041872	3	26041872	9.06305e-08	5.3471
GRG3	0.5% NaCl	S03_26153349	3	26153349	2.86641e-08	5.71448
GRG3	0.5% NaCl	S03_26174076	3	26174076	2.22782e-08	5.79471
GRG3	0.5% NaCl	S03_26196539	3	26196539	4.62832e-08	5.56176
GRG3	0.5% NaCl	S03_26200685	3	26200685	3.68456e-08	5.63448
GRG3	0.5% NaCl	S03_27508749	3	27508749	8.50247e-08	5.36751
GRG3	0.5% NaCl	S03_27525710	3	27525710	5.32003e-08	4.88783
GRG3	0.5% NaCl	S03_27546939	3	27546939	1.48358e-07	5.18932
GRG3	0.5% NaCl	S03_27556304	3	27556304	8.34056e-08	5.37366
GRG3	0.5% NaCl	S03_27814910	3	27814910	6.20761e-08	5.46805
GRG3	0.5% NaCl	S03_27819490	3	27819490	1.83576e-08	5.85628
GRG3	0.5% NaCl	S03_27820531	3	27820531	3.30132e-08	5.66949
GRG3	0.5% NaCl	S03_27829350	3	27829350	2.92101e-08	5.70848
GRG3	0.5% NaCl	S03_27836046	3	27836046	8.10728e-08	5.38273
GRG3	0.5% NaCl	S03_27840228	3	27840228	1.05128e-07	5.29962
GRG3	0.5% NaCl	S03_27842261	3	27842261	5.67421e-08	5.49674
GRG3	0.5% NaCl	S03_27843281	3	27843281	1.27382e-07	5.23815
GRG3	0.5% NaCl	S03_27859526	3	27859526	2.84813e-08	5.71652
GRG3	0.5% NaCl	S03_27862034	3	27862034	1.35139e-07	5.21922
GRG3	0.5% NaCl	S03_27863248	3	27863248	6.38873e-08	5.45886
GRG3	0.5% NaCl	S03_27867993	3	27867993	9.12197e-08	5.34502
GRG3	0.5% NaCl	S03_27891042	3	27891042	5.53905e-08	5.50443
GRG3	0.5% NaCl	S03_27895437	3	27895437	1.19964e-07	5.25736
GRG3	0.5% NaCl	S03_27911224	3	27911224	1.62906e-07	5.15934
GRG3	0.5% NaCl	S03_27921378	3	27921378	1.36154e-07	5.21682
GRG3	0.5% NaCl	S03_27928879	3	27928879	6.30481e-08	5.46308
GRG3	0.5% NaCl	S03_27932979	3	27932979	8.22336e-08	5.37819
GRG3	0.5% NaCl	S03_27953054	3	27953054	5.84269e-08	5.48739
GRG3	0.5% NaCl	S03_27972828	3	27972828	1.23263e-07	5.24868
GRG3	0.5% NaCl	S03_27985532	3	27985532	7.29644e-08	5.41641
GRG3	0.5% NaCl	S03_27993391	3	27993391	6.26119e-08	5.4653
GRG3	0.5% NaCl	S03_28002592	3	28002592	1.60536e-07	5.16404
GRG3	0.5% NaCl	S03_28003848	3	28003848	1.44506e-08	5.93233
GRG3	0.5% NaCl	S03_28014558	3	28014558	2.24922e-08	5.79167
GRG3	0.5% NaCl	S03_28041042	3	28041042	4.38241e-08	5.57918
GRG3	0.5% NaCl	S03_28048030	3	28048030	1.09478e-07	5.28665
GRG3	0.5% NaCl	S03_28051536	3	28051536	2.38297e-08	5.77329
GRG3	0.5% NaCl	S03_28053316	3	28053316	4.39617e-08	5.57818
GRG3	0.5% NaCl	S03_28058697	3	28058697	1.24262e-07	5.2461
GRG3	0.5% NaCl	S03_28088758	3	28088758	1.51897e-08	5.91648
GRG3	0.5% NaCl	S03_28089773	3	28089773	7.82542e-08	5.39404
GRG3	0.5% NaCl	S03_28091431	3	28091431	4.28092e-08	5.58665
GRG3	0.5% NaCl	S03_28095094	3	28095094	2.3424e-09	6.50835
GRG3	0.5% NaCl	S03_28617970	3	28617970	6.67754e-08	5.44474
GRG3	0.5% NaCl	S03_28639704	3	28639704	2.53516e-08	5.75359
GRG3	0.5% NaCl	S03_28648229	3	28648229	3.94205e-08	5.61295
GRG3	0.5% NaCl	S03_28663379	3	28663379	5.01054e-08	5.53644
GRG3	0.5% NaCl	S03_28664518	3	28664518	7.20181e-08	5.42059
GRG3	0.5% NaCl	S03_28665573	3	28665573	4.51085e-08	5.56996
GRG3	0.5% NaCl	S03_28674091	3	28674091	9.30928e-08	5.33852
GRG3	0.5% NaCl	S03_28676957	3	28676957	5.72366e-08	5.49397
GRG3	0.5% NaCl	S03_28694418	3	28694418	5.14982e-08	5.52769
GRG3	0.5% NaCl	S03_28709057	3	28709057	2.08259e-08	5.81616
GRG3	0.5% NaCl	S03_28711572	3	28711572	1.3221e-07	5.22624
GRG3	0.5% NaCl	S03_28713594	3	28713594	4.58873e-08	5.5645
GRG3	0.5% NaCl	S03_28717141	3	28717141	1.43592e-08	5.93434
GRG3	0.5% NaCl	S03_28723162	3	28723162	8.39619e-08	5.37154
GRG3	0.5% NaCl	S03_28726081	3	28726081	6.71804e-08	5.4428
GRG3	0.5% NaCl	S03_28731183	3	28731183	6.65807e-09	6.17812
GRG3	0.5% NaCl	S03_28733877	3	28733877	1.02474e-07	5.3078
GRG3	0.5% NaCl	S03_28745979	3	28745979	2.60789e-08	5.74458
GRG3	0.5% NaCl	S03_28747177	3	28747177	7.78006e-08	5.3959
GRG3	0.5% NaCl	S03_28748294	3	28748294	1.23499e-07	5.24807
GRG3	0.5% NaCl	S03_28749343	3	28749343	2.7469e-08	5.72805
GRG3	0.5% NaCl	S03_28752812	3	28752812	4.25887e-08	5.5883
GRG3	0.5% NaCl	S03_28754129	3	28754129	1.93591e-09	6.56846
GRG3	0.5% NaCl	S03_28759737	3	28759737	9.18137e-09	6.07628
GRG3	0.5% NaCl	S03_28760845	3	28760845	1.27694e-07	5.23737
GRG3	0.5% NaCl	S03_28762286	3	28762286	9.38606e-08	5.33589
GRG3	0.5% NaCl	S03_28778506	3	28778506	3.28202e-08	5.67135
GRG3	0.5% NaCl	S03_28789728	3	28789728	4.75264e-08	5.5533
GRG3	0.5% NaCl	S03_28790740	3	28790740	6.15713e-08	5.47065
GRG3	0.5% NaCl	S03_28793376	3	28793376	9.76036e-09	6.05688
GRG3	0.5% NaCl	S03_28795628	3	28795628	5.45405e-08	5.50937
GRG3	0.5% NaCl	S03_28796796	3	28796796	1.0574e-07	5.29776
GRG3	0.5% NaCl	S03_28800758	3	28800758	6.50531e-08	5.45308
GRG3	0.5% NaCl	S03_28803966	3	28803966	1.013e-07	5.31149
GRG3	0.5% NaCl	S03_28807244	3	28807244	9.00959e-08	5.34899
GRG3	0.5% NaCl	S03_28812046	3	28812046	1.52493e-07	5.18051
GRG3	0.5% NaCl	S03_28814213	3	28814213	1.02367e-08	6.04177
GRG3	0.5% NaCl	S03_28818857	3	28818857	9.38926e-08	5.33579
GRG3	0.5% NaCl	S03_28944623	3	28944623	1.47759e-07	5.19062
GRG3	0.5% NaCl	S03_28979122	3	28979122	2.31832e-08	5.78204
GRG3	0.5% NaCl	S03_28980206	3	28980206	1.52736e-07	5.18
GRG3	0.5% NaCl	S03_28988266	3	28988266	9.45716e-09	6.06689
GRG3	0.5% NaCl	S03_29063579	3	29063579	5.42309e-09	6.24308
GRG3	0.5% NaCl	S03_29064632	3	29064632	1.17961e-09	6.7245
GRG3	0.5% NaCl	S03_29187091	3	29187091	2.99332e-08	5.70069
GRG3	0.5% NaCl	S03_29215962	3	29215962	3.28304e-08	5.67126
GRG3	0.5% NaCl	S03_29594996	3	29594996	3.83132e-08	5.62203
GRG3	0.5% NaCl	S03_29709500	3	29709500	1.56391e-07	5.17242
GRG3	0.5% NaCl	S03_29742691	3	29742691	1.57613e-07	5.16993
GRG3	0.5% NaCl	S03_29751089	3	29751089	9.23865e-08	5.34096
GRG3	0.5% NaCl	S03_30614371	3	30614371	9.60541e-08	5.3285
GRG3	0.5% NaCl	S03_30616430	3	30616430	8.75008e-08	5.35833
GRG3	0.5% NaCl	S03_31092709	3	31092709	9.53232e-09	6.06438
GRG3	0.5% NaCl	S03_31103487	3	31103487	1.35571e-08	5.9526
GRG3	0.5% NaCl	S03_31120686	3	31120686	1.20017e-07	5.25722
GRG3	0.5% NaCl	S03_31128617	3	31128617	1.36711e-07	5.21552
GRG3	0.5% NaCl	S03_31129945	3	31129945	4.10795e-08	5.5998
GRG3	0.5% NaCl	S03_31132863	3	31132863	7.50413e-08	5.40744
GRG3	0.5% NaCl	S03_31152385	3	31152385	1.38217e-07	5.21201
GRG3	0.5% NaCl	S03_31154867	3	31154867	8.23862e-08	5.37759
GRG3	0.5% NaCl	S03_31164947	3	31164947	2.35722e-08	5.77675
GRG3	0.5% NaCl	S03_31168122	3	31168122	1.44652e-07	5.19743
GRG3	0.5% NaCl	S03_31172977	3	31172977	2.67466e-08	5.73653
GRG3	0.5% NaCl	S03_31174026	3	31174026	7.30048e-08	5.41624
GRG3	0.5% NaCl	S03_31191769	3	31191769	8.39515e-08	5.37158
GRG3	0.5% NaCl	S03_31196423	3	31196423	2.43486e-08	5.76643
GRG3	0.5% NaCl	S03_31205491	3	31205491	1.43694e-07	5.19956
GRG3	0.5% NaCl	S03_31206491	3	31206491	3.33022e-08	5.66671
GRG3	0.5% NaCl	S03_31207709	3	31207709	8.58159e-08	5.36455
GRG3	0.5% NaCl	S03_31210234	3	31210234	1.22988e-07	5.2494
GRG3	0.5% NaCl	S03_31217075	3	31217075	1.48352e-07	5.18933
GRG3	0.5% NaCl	S03_31218200	3	31218200	1.13182e-07	5.276
GRG3	0.5% NaCl	S03_31881236	3	31881236	1.26968e-07	5.2392
GRG3	0.5% NaCl	S03_31910675	3	31910675	1.95044e-09	6.5661
GRG3	0.5% NaCl	S03_31939121	3	31939121	1.14602e-07	5.272
GRG3	0.5% NaCl	S03_31940121	3	31940121	2.37595e-08	5.77423
GRG3	0.5% NaCl	S03_31957748	3	31957748	1.25006e-07	5.24418
GRG3	0.5% NaCl	S03_34464953	3	34464953	4.62027e-08	4.93173
GRG3	0.5% NaCl	S03_35579149	3	35579149	1.53593e-07	5.17821
GRG3	0.5% NaCl	S03_35663406	3	35663406	5.9026e-08	5.48414
GRG3	0.5% NaCl	S04_1557513	4	1557513	7.1618e-08	5.42237
GRG3	0.5% NaCl	S04_20041848	4	20041848	9.27311e-08	5.33977
GRG3	0.5% NaCl	S04_20050882	4	20050882	9.53046e-08	5.33101
GRG3	0.5% NaCl	S04_23141277	4	23141277	1.81632e-09	6.58856
GRG3	0.5% NaCl	S04_23144668	4	23144668	1.91435e-08	5.84295
GRG3	0.5% NaCl	S04_23160958	4	23160958	6.27338e-10	6.92298
GRG3	0.5% NaCl	S04_23174035	4	23174035	4.60607e-09	6.29474
GRG3	0.5% NaCl	S04_23246523	4	23246523	6.4419e-10	6.91466
GRG3	0.5% NaCl	S04_23298257	4	23298257	2.33388e-09	6.5095
GRG3	0.5% NaCl	S04_23308099	4	23308099	6.01823e-08	5.47794
GRG3	0.5% NaCl	S04_23318063	4	23318063	9.42836e-08	5.33446
GRG3	0.5% NaCl	S04_23322024	4	23322024	6.53845e-08	5.45146
GRG3	0.5% NaCl	S04_23323205	4	23323205	4.36062e-08	5.58077
GRG3	0.5% NaCl	S04_23335250	4	23335250	3.18759e-08	5.68066
GRG3	0.5% NaCl	S04_23911491	4	23911491	2.05691e-08	5.8201
GRG3	0.5% NaCl	S04_23958858	4	23958858	1.31229e-07	5.22862
GRG3	0.5% NaCl	S04_23973696	4	23973696	3.44714e-08	5.65571
GRG3	0.5% NaCl	S04_23974723	4	23974723	1.44586e-07	5.19757
GRG3	0.5% NaCl	S04_23975726	4	23975726	9.93765e-08	5.31763
GRG3	0.5% NaCl	S04_24000833	4	24000833	7.68506e-08	5.39983
GRG3	0.5% NaCl	S04_24006845	4	24006845	6.70888e-08	5.44324
GRG3	0.5% NaCl	S04_24007903	4	24007903	6.94393e-08	5.43224
GRG3	0.5% NaCl	S04_24009971	4	24009971	1.34713e-07	5.22023
GRG3	0.5% NaCl	S04_24014356	4	24014356	1.48562e-07	5.18888
GRG3	0.5% NaCl	S04_24018467	4	24018467	1.47223e-07	5.19178
GRG3	0.5% NaCl	S04_24022318	4	24022318	8.25548e-08	5.37694
GRG3	0.5% NaCl	S04_24034975	4	24034975	3.67959e-08	5.63491
GRG3	0.5% NaCl	S04_24044828	4	24044828	3.91882e-09	6.34583
GRG3	0.5% NaCl	S04_24045835	4	24045835	1.49169e-07	5.18758
GRG3	0.5% NaCl	S04_24049981	4	24049981	8.15154e-09	6.114
GRG3	0.5% NaCl	S04_24050990	4	24050990	1.12045e-07	5.27923
GRG3	0.5% NaCl	S04_24057880	4	24057880	7.1481e-08	5.42298
GRG3	0.5% NaCl	S04_24062357	4	24062357	8.50057e-08	5.36759
GRG3	0.5% NaCl	S04_24063397	4	24063397	2.28566e-09	6.51609
GRG3	0.5% NaCl	S04_24064404	4	24064404	2.98337e-08	5.70175
GRG3	0.5% NaCl	S04_24065418	4	24065418	9.78607e-09	6.05605
GRG3	0.5% NaCl	S04_24101037	4	24101037	2.86177e-08	5.715
GRG3	0.5% NaCl	S04_24157914	4	24157914	3.64804e-08	5.63766
GRG3	0.5% NaCl	S04_24161558	4	24161558	3.82771e-08	5.62233
GRG3	0.5% NaCl	S04_24164559	4	24164559	9.51935e-08	5.33138
GRG3	0.5% NaCl	S04_24168016	4	24168016	3.48787e-09	6.38265
GRG3	0.5% NaCl	S04_24169060	4	24169060	5.27867e-08	5.5198
GRG3	0.5% NaCl	S04_24174294	4	24174294	3.6677e-08	5.63595
GRG3	0.5% NaCl	S04_24203249	4	24203249	2.87037e-08	5.71405
GRG3	0.5% NaCl	S04_24205308	4	24205308	4.30865e-09	6.31585
GRG3	0.5% NaCl	S04_24214013	4	24214013	1.02607e-07	5.30739
GRG3	0.5% NaCl	S04_24216115	4	24216115	2.2667e-08	5.78921
GRG3	0.5% NaCl	S04_24218242	4	24218242	9.71232e-08	5.32496
GRG3	0.5% NaCl	S04_24229655	4	24229655	5.83727e-08	5.48769
GRG3	0.5% NaCl	S04_24231294	4	24231294	8.33846e-08	5.37374
GRG3	0.5% NaCl	S04_24234306	4	24234306	1.54302e-08	5.91149
GRG3	0.5% NaCl	S04_24239236	4	24239236	1.23155e-07	5.24896
GRG3	0.5% NaCl	S04_24240436	4	24240436	6.32969e-09	6.19414
GRG3	0.5% NaCl	S04_24245683	4	24245683	4.16997e-09	6.3262
GRG3	0.5% NaCl	S04_24248100	4	24248100	4.33751e-08	5.58246
GRG3	0.5% NaCl	S04_24249112	4	24249112	6.42121e-08	5.45724
GRG3	0.5% NaCl	S04_24251542	4	24251542	2.02203e-08	5.82554
GRG3	0.5% NaCl	S04_24261589	4	24261589	1.34729e-08	5.95458
GRG3	0.5% NaCl	S04_24265202	4	24265202	8.45861e-08	5.36917
GRG3	0.5% NaCl	S04_24267469	4	24267469	1.60468e-08	5.89904
GRG3	0.5% NaCl	S04_24271483	4	24271483	7.68559e-08	5.39981
GRG3	0.5% NaCl	S04_24284025	4	24284025	3.75742e-08	5.62824
GRG3	0.5% NaCl	S04_24285132	4	24285132	6.56378e-08	5.45023
GRG3	0.5% NaCl	S04_24286547	4	24286547	1.08195e-08	6.0242
GRG3	0.5% NaCl	S04_24287564	4	24287564	1.25036e-07	5.24411
GRG3	0.5% NaCl	S04_24294945	4	24294945	1.21562e-08	5.98723
GRG3	0.5% NaCl	S04_24295953	4	24295953	1.1571e-07	5.26892
GRG3	0.5% NaCl	S04_24297392	4	24297392	2.80412e-08	5.72148
GRG3	0.5% NaCl	S04_24300927	4	24300927	2.81203e-08	5.72059
GRG3	0.5% NaCl	S04_24303518	4	24303518	8.26532e-08	5.37656
GRG3	0.5% NaCl	S04_24305911	4	24305911	9.17554e-09	6.07648
GRG3	0.5% NaCl	S04_24307345	4	24307345	2.15455e-08	5.80535
GRG3	0.5% NaCl	S04_24309831	4	24309831	9.06173e-08	5.34714
GRG3	0.5% NaCl	S04_24314116	4	24314116	4.52267e-09	6.30052
GRG3	0.5% NaCl	S04_24320698	4	24320698	1.0843e-08	6.02351
GRG3	0.5% NaCl	S04_24321737	4	24321737	5.95035e-10	6.93957
GRG3	0.5% NaCl	S04_24324287	4	24324287	1.16395e-09	6.72871
GRG3	0.5% NaCl	S04_24328068	4	24328068	2.39481e-08	5.77171
GRG3	0.5% NaCl	S04_24330610	4	24330610	2.77795e-09	6.45453
GRG3	0.5% NaCl	S04_24334100	4	24334100	3.11262e-09	6.41861
GRG3	0.5% NaCl	S04_24339569	4	24339569	3.22471e-08	5.67697
GRG3	0.5% NaCl	S04_24340632	4	24340632	2.66527e-09	6.4676
GRG3	0.5% NaCl	S04_24343780	4	24343780	1.48393e-09	6.65225
GRG3	0.5% NaCl	S04_24345972	4	24345972	3.2319e-09	6.40673
GRG3	0.5% NaCl	S04_24346984	4	24346984	2.65262e-08	5.73917
GRG3	0.5% NaCl	S04_24348176	4	24348176	1.89323e-08	5.84647
GRG3	0.5% NaCl	S04_24349500	4	24349500	2.12536e-09	6.53902
GRG3	0.5% NaCl	S04_24351144	4	24351144	1.9735e-08	5.83327
GRG3	0.5% NaCl	S04_25214185	4	25214185	1.05174e-08	6.03318
GRG3	0.5% NaCl	S04_25988131	4	25988131	7.62972e-08	5.40214
GRG3	0.5% NaCl	S04_26133297	4	26133297	1.01625e-07	5.31047
GRG3	0.5% NaCl	S04_26214519	4	26214519	5.8845e-08	5.48512
GRG3	0.5% NaCl	S04_26251090	4	26251090	5.13858e-08	5.52839
GRG3	0.5% NaCl	S04_26344809	4	26344809	2.59206e-08	5.74652
GRG3	0.5% NaCl	S04_26397382	4	26397382	3.87275e-08	5.6186
GRG3	0.5% NaCl	S04_31409531	4	31409531	8.40609e-09	6.10425
GRG3	0.5% NaCl	S04_31413930	4	31413930	1.47366e-07	5.19147
GRG3	0.5% NaCl	S04_32649414	4	32649414	1.42345e-08	5.93711
GRG3	0.5% NaCl	S05_1271858	5	1271858	2.95189e-08	5.70513
GRG3	0.5% NaCl	S05_1483543	5	1483543	5.24796e-08	5.52167
GRG3	0.5% NaCl	S05_1517362	5	1517362	8.47292e-08	5.36863
GRG3	0.5% NaCl	S05_1521940	5	1521940	2.88675e-09	6.4424
GRG3	0.5% NaCl	S05_3326830	5	3326830	9.19867e-08	5.34235
GRG3	0.5% NaCl	S05_3531474	5	3531474	8.96797e-08	5.35047
GRG3	0.5% NaCl	S05_7038085	5	7038085	3.00786e-08	5.69914
GRG3	0.5% NaCl	S05_7043305	5	7043305	7.16328e-08	5.4223
GRG3	0.5% NaCl	S05_7058338	5	7058338	1.19874e-07	5.25761
GRG3	0.5% NaCl	S05_7060392	5	7060392	3.11798e-08	5.68769
GRG3	0.5% NaCl	S05_7149176	5	7149176	9.91534e-08	5.31834
GRG3	0.5% NaCl	S05_15692756	5	15692756	3.38354e-09	6.39225
GRG3	0.5% NaCl	S05_24648052	5	24648052	1.2013e-09	6.71877
GRG3	0.5% NaCl	S05_27840412	5	27840412	4.89418e-09	6.27555
GRG3	0.5% NaCl	S05_27844762	5	27844762	1.54065e-07	5.17723
GRG3	0.5% NaCl	S05_27846450	5	27846450	5.17442e-11	7.70269
GRG3	0.5% NaCl	S05_27855692	5	27855692	1.1993e-12	8.86539
GRG3	0.5% NaCl	S05_27856692	5	27856692	7.19515e-09	6.15354
GRG3	0.5% NaCl	S05_27858716	5	27858716	3.71157e-12	8.51819
GRG3	0.5% NaCl	S05_27859752	5	27859752	1.47022e-10	7.37725
GRG3	0.5% NaCl	S05_27874908	5	27874908	1.07105e-11	8.19115
GRG3	0.5% NaCl	S05_27880928	5	27880928	1.69042e-10	7.33366
GRG3	0.5% NaCl	S05_27896359	5	27896359	4.6232e-08	5.56211
GRG3	0.5% NaCl	S05_27897478	5	27897478	8.5533e-09	6.09875
GRG3	0.5% NaCl	S05_27898806	5	27898806	6.43087e-08	5.45676
GRG3	0.5% NaCl	S05_27902731	5	27902731	6.39508e-09	6.19088
GRG3	0.5% NaCl	S05_27910381	5	27910381	7.41322e-10	6.87055
GRG3	0.5% NaCl	S05_27911540	5	27911540	1.0148e-11	8.20783
GRG3	0.5% NaCl	S05_27916728	5	27916728	2.74876e-12	8.61063
GRG3	0.5% NaCl	S05_27919710	5	27919710	1.41167e-08	5.93975
GRG3	0.5% NaCl	S05_27934857	5	27934857	5.42665e-11	7.68789
GRG3	0.5% NaCl	S05_27940204	5	27940204	2.61087e-09	6.47411
GRG3	0.5% NaCl	S05_27942462	5	27942462	4.2961e-11	7.76053
GRG3	0.5% NaCl	S05_27945908	5	27945908	2.90225e-12	8.59391
GRG3	0.5% NaCl	S05_27947099	5	27947099	7.67386e-10	6.85969
GRG3	0.5% NaCl	S05_27948233	5	27948233	1.94074e-10	7.29051
GRG3	0.5% NaCl	S05_27949261	5	27949261	5.92963e-12	8.37378
GRG3	0.5% NaCl	S05_27950265	5	27950265	3.25083e-11	7.84714
GRG3	0.5% NaCl	S05_27951265	5	27951265	9.62603e-14	9.63536
GRG3	0.5% NaCl	S05_27952269	5	27952269	1.69398e-13	9.46346
GRG3	0.5% NaCl	S05_27961292	5	27961292	9.60696e-14	9.63596
GRG3	0.5% NaCl	S05_27971523	5	27971523	3.08737e-10	7.14527
GRG3	0.5% NaCl	S05_27972830	5	27972830	1.44748e-13	9.51133
GRG3	0.5% NaCl	S05_27973962	5	27973962	3.56144e-10	7.10053
GRG3	0.5% NaCl	S05_27993091	5	27993091	2.20076e-12	8.67901
GRG3	0.5% NaCl	S05_27995309	5	27995309	1.66438e-08	5.88743
GRG3	0.5% NaCl	S05_28008035	5	28008035	4.48525e-09	6.30315
GRG3	0.5% NaCl	S05_28015116	5	28015116	1.03154e-08	6.03934
GRG3	0.5% NaCl	S05_28026580	5	28026580	1.85471e-08	5.85301
GRG3	0.5% NaCl	S05_28027662	5	28027662	1.7919e-10	7.31545
GRG3	0.5% NaCl	S05_28031919	5	28031919	4.67841e-10	7.01503
GRG3	0.5% NaCl	S05_28039437	5	28039437	8.53276e-10	6.82635
GRG3	0.5% NaCl	S05_28050331	5	28050331	9.16986e-10	6.80372
GRG3	0.5% NaCl	S05_28081822	5	28081822	2.27233e-12	8.66917
GRG3	0.5% NaCl	S05_28101725	5	28101725	8.61126e-08	5.36345
GRG3	0.5% NaCl	S05_28112494	5	28112494	8.58699e-11	7.545
GRG3	0.5% NaCl	S05_28951226	5	28951226	5.02003e-08	5.53584
GRG3	0.5% NaCl	S06_755682	6	755682	4.93809e-08	5.54109
GRG3	0.5% NaCl	S06_1783965	6	1783965	9.5133e-08	5.33159
GRG3	0.5% NaCl	S06_1787195	6	1787195	7.21815e-10	6.87893
GRG3	0.5% NaCl	S06_1788250	6	1788250	6.09102e-08	5.4741
GRG3	0.5% NaCl	S06_1800538	6	1800538	1.00197e-07	5.315
GRG3	0.5% NaCl	S06_1804367	6	1804367	1.84838e-08	5.8541
GRG3	0.5% NaCl	S06_1817571	6	1817571	1.13907e-08	6.00787
GRG3	0.5% NaCl	S06_1972884	6	1972884	2.71579e-08	5.73167
GRG3	0.5% NaCl	S06_1983384	6	1983384	3.93755e-08	5.61331
GRG3	0.5% NaCl	S06_6066083	6	6066083	3.83632e-08	5.62162
GRG3	0.5% NaCl	S06_6907904	6	6907904	9.8621e-08	5.32007
GRG3	0.5% NaCl	S06_8856428	6	8856428	8.59238e-09	5.45452
GRG3	0.5% NaCl	S06_23006912	6	23006912	1.6236e-07	5.16042
GRG3	0.5% NaCl	S06_23034034	6	23034034	1.26461e-07	5.24048
GRG3	0.5% NaCl	S06_23120269	6	23120269	1.04989e-08	6.03374
GRG3	0.5% NaCl	S06_24878175	6	24878175	7.85196e-09	6.12586
GRG3	0.5% NaCl	S06_24881390	6	24881390	1.05173e-07	5.29949
GRG3	0.5% NaCl	S06_24907675	6	24907675	5.18785e-08	5.52534
GRG3	0.5% NaCl	S06_24916358	6	24916358	4.31582e-08	5.58406
GRG3	0.5% NaCl	S06_24918430	6	24918430	1.01901e-07	5.3096
GRG3	0.5% NaCl	S06_24944303	6	24944303	1.55572e-07	5.17411
GRG3	0.5% NaCl	S06_24948683	6	24948683	1.15435e-07	5.26969
GRG3	0.5% NaCl	S06_24956809	6	24956809	1.35955e-08	5.31208
GRG3	0.5% NaCl	S06_25016592	6	25016592	3.69697e-08	5.63341
GRG3	0.5% NaCl	S06_26608400	6	26608400	1.49282e-07	5.18733
GRG3	0.5% NaCl	S07_1926593	7	1926593	5.81923e-08	5.48868
GRG3	0.5% NaCl	S07_1932288	7	1932288	1.37377e-07	5.21396
GRG3	0.5% NaCl	S07_1936757	7	1936757	1.10965e-07	5.28233
GRG3	0.5% NaCl	S07_1972974	7	1972974	7.07309e-08	5.42635
GRG3	0.5% NaCl	S07_1974034	7	1974034	1.24256e-07	5.24611
GRG3	0.5% NaCl	S07_1977247	7	1977247	3.94508e-08	5.6127
GRG3	0.5% NaCl	S07_1978260	7	1978260	5.56029e-08	5.50321
GRG3	0.5% NaCl	S07_1995360	7	1995360	2.0336e-08	5.82373
GRG3	0.5% NaCl	S07_2001342	7	2001342	1.01079e-07	5.31219
GRG3	0.5% NaCl	S07_2005929	7	2005929	5.08252e-08	5.53189
GRG3	0.5% NaCl	S07_2013935	7	2013935	2.83118e-08	5.71842
GRG3	0.5% NaCl	S07_2015996	7	2015996	9.79958e-08	5.3221
GRG3	0.5% NaCl	S07_2017170	7	2017170	1.17633e-07	5.26365
GRG3	0.5% NaCl	S07_2018735	7	2018735	4.13126e-09	6.32914
GRG3	0.5% NaCl	S07_3247210	7	3247210	9.38688e-08	5.33587
GRG3	0.5% NaCl	S07_7042896	7	7042896	7.08774e-08	5.42569
GRG3	0.5% NaCl	S07_7055742	7	7055742	8.79292e-09	6.08999
GRG3	0.5% NaCl	S07_7089909	7	7089909	1.35671e-07	5.21796
GRG3	0.5% NaCl	S07_7123492	7	7123492	1.28908e-07	5.23434
GRG3	0.5% NaCl	S07_8195963	7	8195963	1.47474e-07	5.19124
GRG3	0.5% NaCl	S07_11479282	7	11479282	8.76757e-09	5.44825
GRG3	0.5% NaCl	S07_12540860	7	12540860	4.33591e-08	4.9515
GRG3	0.5% NaCl	S07_15041879	7	15041879	1.19158e-07	5.25952
GRG3	0.5% NaCl	S07_16672478	7	16672478	1.26417e-07	5.24059
GRG3	0.5% NaCl	S07_16955754	7	16955754	1.59678e-07	5.16576
GRG3	0.5% NaCl	S07_16959706	7	16959706	3.82361e-08	5.62268
GRG3	0.5% NaCl	S07_16962827	7	16962827	1.17652e-07	5.2636
GRG3	0.5% NaCl	S07_22067146	7	22067146	7.51136e-08	5.40714
GRG3	0.5% NaCl	S07_22072389	7	22072389	1.08739e-08	6.02261
GRG3	0.5% NaCl	S07_23756861	7	23756861	6.93969e-08	5.43243
GRG3	0.5% NaCl	S07_23757912	7	23757912	8.42984e-09	6.10335
GRG3	0.5% NaCl	S07_23760041	7	23760041	7.50599e-08	5.40737
GRG3	0.5% NaCl	S07_23764230	7	23764230	1.54741e-08	5.91059
GRG3	0.5% NaCl	S07_23766470	7	23766470	1.42539e-07	5.20214
GRG3	0.5% NaCl	S07_23767599	7	23767599	1.13208e-07	5.27592
GRG3	0.5% NaCl	S07_23773116	7	23773116	6.60389e-08	5.44828
GRG3	0.5% NaCl	S07_23801332	7	23801332	1.54011e-07	5.17734
GRG3	0.5% NaCl	S07_23806988	7	23806988	1.60265e-07	5.16458
GRG3	0.5% NaCl	S07_23809878	7	23809878	3.2356e-08	5.67589
GRG3	0.5% NaCl	S07_23816377	7	23816377	1.04688e-07	5.30096
GRG3	0.5% NaCl	S07_23828459	7	23828459	1.35105e-07	5.2193
GRG3	0.5% NaCl	S07_23834210	7	23834210	1.41616e-07	5.20422
GRG3	0.5% NaCl	S07_25314265	7	25314265	1.25014e-07	5.24416
GRG3	0.5% NaCl	S07_25845003	7	25845003	4.61431e-08	5.56273
GRG3	0.5% NaCl	S07_25847734	7	25847734	7.17506e-08	5.42178
GRG3	0.5% NaCl	S08_372351	8	372351	4.33232e-08	5.58284
GRG3	0.5% NaCl	S08_396946	8	396946	6.54933e-08	5.45093
GRG3	0.5% NaCl	S08_397953	8	397953	1.09522e-07	5.28652
GRG3	0.5% NaCl	S08_398953	8	398953	7.66059e-08	5.40085
GRG3	0.5% NaCl	S08_403136	8	403136	1.03612e-07	5.30427
GRG3	0.5% NaCl	S08_414960	8	414960	1.14504e-07	5.27228
GRG3	0.5% NaCl	S08_422807	8	422807	6.61911e-08	5.44754
GRG3	0.5% NaCl	S08_919711	8	919711	1.44648e-07	5.19744
GRG3	0.5% NaCl	S08_966697	8	966697	1.41574e-07	5.20432
GRG3	0.5% NaCl	S08_1095206	8	1095206	1.40054e-08	5.94227
GRG3	0.5% NaCl	S08_2551248	8	2551248	1.63195e-08	5.89368
GRG3	0.5% NaCl	S08_3331058	8	3331058	3.52856e-09	6.37899
GRG3	0.5% NaCl	S08_3356664	8	3356664	8.5634e-08	5.36523
GRG3	0.5% NaCl	S08_3357668	8	3357668	5.5182e-09	6.23757
GRG3	0.5% NaCl	S08_3363607	8	3363607	4.34338e-08	5.58203
GRG3	0.5% NaCl	S08_3364762	8	3364762	1.63811e-07	5.15757
GRG3	0.5% NaCl	S08_3371826	8	3371826	9.0708e-08	5.34682
GRG3	0.5% NaCl	S08_3589983	8	3589983	1.52266e-07	5.18099
GRG3	0.5% NaCl	S08_3623209	8	3623209	1.33281e-08	5.95801
GRG3	0.5% NaCl	S08_3625265	8	3625265	9.4903e-08	5.33236
GRG3	0.5% NaCl	S08_3886062	8	3886062	1.22652e-07	5.25027
GRG3	0.5% NaCl	S08_3915777	8	3915777	5.88677e-08	5.48499
GRG3	0.5% NaCl	S08_4055670	8	4055670	7.41418e-08	5.4113
GRG3	0.5% NaCl	S08_4056671	8	4056671	3.70141e-08	5.63303
GRG3	0.5% NaCl	S08_4143336	8	4143336	6.23932e-08	5.46642
GRG3	0.5% NaCl	S08_4153335	8	4153335	3.5675e-08	5.64478
GRG3	0.5% NaCl	S08_4154396	8	4154396	3.14183e-08	5.68526
GRG3	0.5% NaCl	S08_4155461	8	4155461	1.6938e-09	6.61057
GRG3	0.5% NaCl	S08_4171559	8	4171559	4.74458e-08	5.55385
GRG3	0.5% NaCl	S08_17390377	8	17390377	1.19532e-07	5.25852
GRG3	0.5% NaCl	S08_18665308	8	18665308	2.06789e-09	6.54767
GRG3	0.5% NaCl	S09_12928975	9	12928975	2.06206e-08	5.81931
GRG3	0.5% NaCl	S09_16411811	9	16411811	6.45052e-08	5.45579
GRG3	0.5% NaCl	S09_16415032	9	16415032	1.07478e-09	6.75378
GRG3	0.5% NaCl	S09_16430486	9	16430486	2.36753e-08	5.77536
GRG3	0.5% NaCl	S09_16433527	9	16433527	1.19934e-07	5.25745
GRG3	0.5% NaCl	S09_18389054	9	18389054	1.36417e-08	5.95062
GRG3	0.5% NaCl	S09_19508050	9	19508050	7.54941e-08	5.40552
GRG3	0.5% NaCl	S09_19544198	9	19544198	5.20157e-08	5.5245
GRG3	0.5% NaCl	S10_579070	10	579070	1.63098e-07	4.53871
GRG3	0.5% NaCl	S10_2160260	10	2160260	8.02821e-08	5.38587
GRG3	0.5% NaCl	S10_4008412	10	4008412	1.09956e-07	5.28525
GRG3	0.5% NaCl	S10_6424225	10	6424225	2.14982e-08	5.16971
GRG3	0.5% NaCl	S10_7353263	10	7353263	1.17819e-07	4.64012
GRG3	0.5% NaCl	S10_10807166	10	10807166	1.82149e-08	5.85876
GRG3	0.5% NaCl	S10_12655213	10	12655213	5.16428e-09	6.25855
GRG3	0.5% NaCl	S10_17213982	10	17213982	4.96771e-08	4.90916
GRG3	0.5% NaCl	S10_17303203	10	17303203	6.12456e-09	6.20457
GRG3	0.5% NaCl	S10_17304211	10	17304211	9.74243e-08	5.32397
GRG3	0.5% NaCl	S10_17363986	10	17363986	9.14345e-08	5.34427
GRG3	0.5% NaCl	S10_17377541	10	17377541	1.39736e-07	5.2085
GRG3	0.5% NaCl	S10_17407287	10	17407287	8.43888e-08	5.36992
GRG3	0.5% NaCl	S10_22588609	10	22588609	2.74522e-08	5.72824
GRG3	0.5% NaCl	S11_433580	11	433580	9.47885e-10	6.7933
GRG3	0.5% NaCl	S11_2661844	11	2661844	8.36698e-08	5.37265
GRG3	0.5% NaCl	S11_3095975	11	3095975	4.30662e-08	5.58474
GRG3	0.5% NaCl	S11_3159832	11	3159832	2.16526e-10	7.25629
GRG3	0.5% NaCl	S11_3179032	11	3179032	1.57609e-07	5.16994
GRG3	0.5% NaCl	S11_3645171	11	3645171	1.16356e-07	5.26714
GRG3	0.5% NaCl	S11_3659954	11	3659954	1.5875e-07	5.16763
GRG3	0.5% NaCl	S11_5014936	11	5014936	6.56192e-08	5.45032
GRG3	0.5% NaCl	S11_5027675	11	5027675	1.07393e-07	5.2928
GRG3	0.5% NaCl	S11_5078768	11	5078768	1.66571e-08	5.88718
GRG3	0.5% NaCl	S11_5088256	11	5088256	1.06526e-08	6.02913
GRG3	0.5% NaCl	S11_5095478	11	5095478	1.55207e-07	5.17486
GRG3	0.5% NaCl	S11_5097524	11	5097524	1.39274e-08	5.94404
GRG3	0.5% NaCl	S11_5098569	11	5098569	4.11587e-09	6.33032
GRG3	0.5% NaCl	S11_5105943	11	5105943	2.58418e-08	5.74749
GRG3	0.5% NaCl	S11_5376938	11	5376938	1.50989e-07	5.18369
GRG3	0.5% NaCl	S11_6781266	11	6781266	9.46624e-08	5.33317
GRG3	0.5% NaCl	S11_7490738	11	7490738	1.07762e-07	5.2917
GRG3	0.5% NaCl	S11_9147703	11	9147703	4.69788e-08	5.557
GRG3	0.5% NaCl	S11_9150849	11	9150849	9.24845e-08	5.34062
GRG3	0.5% NaCl	S11_9165883	11	9165883	1.39182e-07	5.20978
GRG3	0.5% NaCl	S11_9194108	11	9194108	1.09448e-07	5.28673
GRG3	0.5% NaCl	S11_9195175	11	9195175	1.34466e-07	5.22082
GRG3	0.5% NaCl	S11_9205474	11	9205474	3.10199e-08	5.68933
GRG3	0.5% NaCl	S11_9213953	11	9213953	3.82604e-08	5.62247
GRG3	0.5% NaCl	S11_9222550	11	9222550	1.55785e-08	5.90845
GRG3	0.5% NaCl	S11_9230039	11	9230039	7.49758e-08	5.40772
GRG3	0.5% NaCl	S11_10253549	11	10253549	9.98211e-08	5.3162
GRG3	0.5% NaCl	S11_10264745	11	10264745	1.26806e-08	5.97382
GRG3	0.5% NaCl	S11_10272106	11	10272106	2.61337e-08	5.74391
GRG3	0.5% NaCl	S11_11031886	11	11031886	7.0942e-08	5.4254
GRG3	0.5% NaCl	S11_11098986	11	11098986	1.65055e-08	5.89008
GRG3	0.5% NaCl	S11_11099990	11	11099990	4.45877e-08	5.57367
GRG3	0.5% NaCl	S11_11103524	11	11103524	1.37677e-07	5.21326
GRG3	0.5% NaCl	S11_13049418	11	13049418	7.11417e-08	4.79732
GRG3	0.5% NaCl	S11_13396157	11	13396157	7.18562e-10	6.88034
GRG3	0.5% NaCl	S11_13947983	11	13947983	9.5507e-08	5.33033
GRG3	0.5% NaCl	S11_16568905	11	16568905	4.70645e-11	7.73217
GRG3	0.5% NaCl	S11_16574331	11	16574331	6.59786e-11	7.62707
GRG3	0.5% NaCl	S11_16579441	11	16579441	1.01409e-10	7.49315
GRG3	0.5% NaCl	S11_18354928	11	18354928	4.27203e-08	5.58731
GRG3	0.5% NaCl	S11_20291974	11	20291974	2.32088e-08	5.78169
GRG3	0.5% NaCl	S11_20296077	11	20296077	2.30507e-08	5.78387
GRG3	0.5% NaCl	S11_22609027	11	22609027	8.99567e-08	5.34948
GRG3	0.5% NaCl	S11_22897530	11	22897530	1.26654e-07	5.23999
GRG3	0.5% NaCl	S11_22958149	11	22958149	6.43553e-08	5.45653
GRG3	0.5% NaCl	S11_27851674	11	27851674	9.13617e-09	6.07784
GRG3	0.5% NaCl	S12_153015	12	153015	5.44263e-09	6.24194
GRG3	0.5% NaCl	S12_279261	12	279261	1.52989e-08	5.9142
GRG3	0.5% NaCl	S12_622592	12	622592	1.93701e-10	7.29111
GRG3	0.5% NaCl	S12_682395	12	682395	1.38444e-09	6.6741
GRG3	0.5% NaCl	S12_783185	12	783185	3.06697e-11	7.86521
GRG3	0.5% NaCl	S12_928018	12	928018	4.72354e-11	7.73104
GRG3	0.5% NaCl	S12_984912	12	984912	2.02555e-10	7.27714
GRG3	0.5% NaCl	S12_1793878	12	1793878	3.82565e-08	5.62251
GRG3	0.5% NaCl	S12_2026975	12	2026975	5.81019e-09	6.22125
GRG3	0.5% NaCl	S12_5570128	12	5570128	5.75928e-08	5.49199
GRG3	0.5% NaCl	S12_5795301	12	5795301	2.17623e-08	5.80217
GRG3	0.5% NaCl	S12_5826245	12	5826245	3.77143e-08	5.62706
GRG3	0.5% NaCl	S12_5829656	12	5829656	1.2851e-07	5.23533
GRG3	0.5% NaCl	S12_5830696	12	5830696	1.00996e-07	5.31245
GRG3	0.5% NaCl	S12_5831706	12	5831706	4.04939e-08	5.60438
GRG3	0.5% NaCl	S12_5834819	12	5834819	5.1705e-08	5.52641
GRG3	0.5% NaCl	S12_5835851	12	5835851	2.66879e-08	5.73723
GRG3	0.5% NaCl	S12_5836931	12	5836931	1.6236e-08	5.89531
GRG3	0.5% NaCl	S12_5838071	12	5838071	9.14871e-09	6.07741
GRG3	0.5% NaCl	S12_5839081	12	5839081	1.71131e-08	5.87859
GRG3	0.5% NaCl	S12_5840098	12	5840098	5.21119e-09	6.25569
GRG3	0.5% NaCl	S12_5841105	12	5841105	4.20557e-08	5.59231
GRG3	0.5% NaCl	S12_5843164	12	5843164	6.00251e-09	6.21094
GRG3	0.5% NaCl	S12_5847530	12	5847530	3.31888e-08	5.6678
GRG3	0.5% NaCl	S12_5848635	12	5848635	1.4855e-08	5.92356
GRG3	0.5% NaCl	S12_5849683	12	5849683	3.03241e-08	5.69656
GRG3	0.5% NaCl	S12_5850686	12	5850686	4.95215e-09	6.27182
GRG3	0.5% NaCl	S12_5862016	12	5862016	1.48199e-07	5.18966
GRG3	0.5% NaCl	S12_5889003	12	5889003	4.05133e-08	5.60423
GRG3	0.5% NaCl	S12_6180217	12	6180217	1.57825e-08	5.90432
GRG3	0.5% NaCl	S12_6237757	12	6237757	1.6738e-08	5.88564
GRG3	0.5% NaCl	S12_6238803	12	6238803	2.29436e-08	5.78535
GRG3	0.5% NaCl	S12_6242962	12	6242962	3.20124e-09	6.40974
GRG3	0.5% NaCl	S12_6245049	12	6245049	2.28953e-08	5.78602
GRG3	0.5% NaCl	S12_6247135	12	6247135	8.71561e-08	5.3596
GRG3	0.5% NaCl	S12_6249244	12	6249244	5.0399e-09	6.26627
GRG3	0.5% NaCl	S12_6250254	12	6250254	7.2549e-09	6.15092
GRG3	0.5% NaCl	S12_6317019	12	6317019	1.57793e-09	6.6329
GRG3	0.5% NaCl	S12_6318033	12	6318033	5.19736e-08	5.52476
GRG3	0.5% NaCl	S12_6322047	12	6322047	2.51423e-08	5.75622
GRG3	0.5% NaCl	S12_6323050	12	6323050	1.14401e-07	5.27257
GRG3	0.5% NaCl	S12_6532314	12	6532314	5.46169e-08	5.50892
GRG3	0.5% NaCl	S12_6543974	12	6543974	9.10887e-09	6.07879
GRG3	0.5% NaCl	S12_6570037	12	6570037	1.20524e-07	5.25587
GRG3	0.5% NaCl	S12_6576354	12	6576354	5.25426e-08	5.52128
GRG3	0.5% NaCl	S12_6586225	12	6586225	1.94762e-08	5.83747
GRG3	0.5% NaCl	S12_6731073	12	6731073	1.19639e-08	5.99229
GRG3	0.5% NaCl	S12_6732462	12	6732462	4.64731e-09	6.29192
GRG3	0.5% NaCl	S12_6739917	12	6739917	1.12011e-07	5.27933
GRG3	0.5% NaCl	S12_6747914	12	6747914	4.3962e-08	5.57818
GRG3	0.5% NaCl	S12_6752166	12	6752166	1.43296e-08	5.935
GRG3	0.5% NaCl	S12_6753201	12	6753201	6.08931e-11	7.65204
GRG3	0.5% NaCl	S12_6757623	12	6757623	2.95855e-09	6.43464
GRG3	0.5% NaCl	S12_6758661	12	6758661	1.60588e-07	5.16393
GRG3	0.5% NaCl	S12_6760874	12	6760874	1.15128e-09	6.73215
GRG3	0.5% NaCl	S12_6761977	12	6761977	7.61796e-09	6.13545
GRG3	0.5% NaCl	S12_6765254	12	6765254	4.58313e-09	6.29632
GRG3	0.5% NaCl	S12_6767373	12	6767373	8.97256e-09	6.08357
GRG3	0.5% NaCl	S12_6769435	12	6769435	4.30751e-10	7.04093
GRG3	0.5% NaCl	S12_6771444	12	6771444	5.09967e-09	6.26254
GRG3	0.5% NaCl	S12_6775529	12	6775529	8.32725e-10	6.83402
GRG3	0.5% NaCl	S12_6780078	12	6780078	9.94644e-09	6.05089
GRG3	0.5% NaCl	S12_6782103	12	6782103	3.08225e-10	7.14579
GRG3	0.5% NaCl	S12_6784126	12	6784126	2.55299e-09	6.48118
GRG3	0.5% NaCl	S12_6785169	12	6785169	7.15594e-10	6.88164
GRG3	0.5% NaCl	S12_6787178	12	6787178	3.51919e-08	5.64912
GRG3	0.5% NaCl	S12_6790292	12	6790292	1.94324e-09	6.56727
GRG3	0.5% NaCl	S12_6795430	12	6795430	2.43822e-08	5.76599
GRG3	0.5% NaCl	S12_6816606	12	6816606	5.91915e-09	6.21537
GRG3	0.5% NaCl	S12_6821410	12	6821410	3.48248e-08	5.65246
GRG3	0.5% NaCl	S12_6864918	12	6864918	1.2174e-08	5.98677
GRG3	0.5% NaCl	S12_6952228	12	6952228	4.95403e-09	6.2717
GRG3	0.5% NaCl	S12_6953252	12	6953252	3.90681e-10	7.07153
GRG3	0.5% NaCl	S12_6958707	12	6958707	1.24244e-10	7.4298
GRG3	0.5% NaCl	S12_6965131	12	6965131	6.37651e-10	6.91786
GRG3	0.5% NaCl	S12_6966203	12	6966203	1.91254e-08	5.84325
GRG3	0.5% NaCl	S12_6968212	12	6968212	9.25558e-09	6.07373
GRG3	0.5% NaCl	S12_6969218	12	6969218	1.75346e-08	5.87086
GRG3	0.5% NaCl	S12_6970256	12	6970256	1.32336e-08	5.96027
GRG3	0.5% NaCl	S12_6973781	12	6973781	4.9633e-08	5.53947
GRG3	0.5% NaCl	S12_6975849	12	6975849	1.58822e-08	5.90231
GRG3	0.5% NaCl	S12_6977880	12	6977880	1.00734e-07	5.31329
GRG3	0.5% NaCl	S12_7035323	12	7035323	7.05635e-08	5.42711
GRG3	0.5% NaCl	S12_7046219	12	7046219	8.60377e-08	5.36373
GRG3	0.5% NaCl	S12_7052375	12	7052375	5.46225e-08	5.50889
GRG3	0.5% NaCl	S12_7096267	12	7096267	8.14663e-08	5.38118
GRG3	0.5% NaCl	S12_7099773	12	7099773	4.60518e-08	5.56336
GRG3	0.5% NaCl	S12_7100926	12	7100926	3.19297e-08	5.68012
GRG3	0.5% NaCl	S12_8767120	12	8767120	1.2589e-08	5.97612
GRG3	0.5% NaCl	S12_10582290	12	10582290	2.68373e-09	6.46542
GRG3	0.5% NaCl	S12_10610812	12	10610812	1.57852e-07	5.16944
GRG3	0.5% NaCl	S12_10761452	12	10761452	4.1472e-08	5.59677
GRG3	0.5% NaCl	S12_10787392	12	10787392	8.4237e-08	5.37049
GRG3	0.5% NaCl	S12_10788392	12	10788392	7.67462e-08	5.40026
GRG3	0.5% NaCl	S12_10789406	12	10789406	3.34728e-08	5.66508
GRG3	0.5% NaCl	S12_10792430	12	10792430	9.71227e-08	5.32496
GRG3	0.5% NaCl	S12_10797594	12	10797594	2.68497e-08	5.73531
GRG3	0.5% NaCl	S12_10799734	12	10799734	1.36079e-08	5.95141
GRG3	0.5% NaCl	S12_10801871	12	10801871	1.0537e-07	5.29889
GRG3	0.5% NaCl	S12_10805099	12	10805099	5.01726e-08	5.53601
GRG3	0.5% NaCl	S12_10813224	12	10813224	2.173e-08	5.80264
GRG3	0.5% NaCl	S12_10830651	12	10830651	1.32584e-07	5.22534
GRG3	0.5% NaCl	S12_10863577	12	10863577	8.85508e-08	5.35452
GRG3	0.5% NaCl	S12_10870666	12	10870666	1.49257e-08	5.92205
GRG3	0.5% NaCl	S12_10886200	12	10886200	3.0387e-08	5.69589
GRG3	0.5% NaCl	S12_10896171	12	10896171	7.14724e-08	5.42302
GRG3	0.5% NaCl	S12_10952911	12	10952911	4.00202e-08	5.60813
GRG3	0.5% NaCl	S12_10960891	12	10960891	1.07314e-07	5.29303
GRG3	0.5% NaCl	S12_10975215	12	10975215	8.9632e-08	5.35064
GRG3	0.5% NaCl	S12_11008041	12	11008041	1.05138e-07	5.29959
GRG3	0.5% NaCl	S12_11009106	12	11009106	7.81534e-08	5.39446
GRG3	0.5% NaCl	S12_11039381	12	11039381	7.48618e-08	5.40821
GRG3	0.5% NaCl	S12_11055600	12	11055600	1.38636e-07	5.21104
GRG3	0.5% NaCl	S12_11079040	12	11079040	2.1882e-08	5.80042
GRG3	0.5% NaCl	S12_11085901	12	11085901	9.51018e-08	5.33169
GRG3	0.5% NaCl	S12_11096482	12	11096482	1.05286e-07	5.29914
GRG3	0.5% NaCl	S12_11144948	12	11144948	6.64698e-08	5.4462
GRG3	0.5% NaCl	S12_11163511	12	11163511	4.49327e-08	5.57121
GRG3	0.5% NaCl	S12_11182074	12	11182074	1.14996e-07	5.27091
GRG3	0.5% NaCl	S12_11202199	12	11202199	1.01275e-07	5.31157
GRG3	0.5% NaCl	S12_11264814	12	11264814	1.33436e-07	5.22328
GRG3	0.5% NaCl	S12_11290041	12	11290041	1.55012e-07	5.17526
GRG3	0.5% NaCl	S12_11320208	12	11320208	1.38502e-07	5.21135
GRG3	0.5% NaCl	S12_11326364	12	11326364	6.82778e-08	5.43763
GRG3	0.5% NaCl	S12_11380365	12	11380365	1.24035e-07	5.24668
GRG3	0.5% NaCl	S12_11382436	12	11382436	1.5054e-07	5.18464
GRG3	0.5% NaCl	S12_11423834	12	11423834	4.11082e-08	5.59958
GRG3	0.5% NaCl	S12_11436691	12	11436691	5.9368e-08	5.48229
GRG3	0.5% NaCl	S12_11576939	12	11576939	3.69826e-08	5.6333
GRG3	0.5% NaCl	S12_11623746	12	11623746	8.03453e-08	5.38561
GRG3	0.5% NaCl	S12_11680681	12	11680681	5.50779e-09	6.23817
GRG3	0.5% NaCl	S12_11683081	12	11683081	1.00569e-07	5.31381
GRG3	0.5% NaCl	S12_11718262	12	11718262	6.04345e-08	5.47661
GRG3	0.5% NaCl	S12_11757823	12	11757823	1.3744e-07	5.21381
GRG3	0.5% NaCl	S12_11762037	12	11762037	1.41315e-07	5.2049
GRG3	0.5% NaCl	S12_11764041	12	11764041	7.43227e-08	5.41052
GRG3	0.5% NaCl	S12_11871871	12	11871871	7.68817e-08	5.3997
GRG3	0.5% NaCl	S12_11930348	12	11930348	7.51587e-08	5.40695
GRG3	0.5% NaCl	S12_12203545	12	12203545	1.52e-07	5.18155
GRG3	0.5% NaCl	S12_12206070	12	12206070	1.86131e-08	5.85188
GRG3	0.5% NaCl	S12_12231513	12	12231513	5.57701e-08	5.50225
GRG3	0.5% NaCl	S12_12266723	12	12266723	9.66997e-08	5.32636
GRG3	0.5% NaCl	S12_12268747	12	12268747	1.50375e-07	5.18499
GRG3	0.5% NaCl	S12_12279195	12	12279195	1.16148e-07	5.26772
GRG3	0.5% NaCl	S12_12296188	12	12296188	4.48879e-08	5.57153
GRG3	0.5% NaCl	S12_12328637	12	12328637	3.41829e-08	5.65839
GRG3	0.5% NaCl	S12_12353060	12	12353060	8.17704e-08	5.37999
GRG3	0.5% NaCl	S12_12361788	12	12361788	1.09729e-08	6.01973
GRG3	0.5% NaCl	S12_12392839	12	12392839	9.51044e-08	5.33168
GRG3	0.5% NaCl	S12_12400300	12	12400300	1.5967e-07	5.16577
GRG3	0.5% NaCl	S12_12490108	12	12490108	1.27671e-07	5.23743
GRG3	0.5% NaCl	S12_12598634	12	12598634	4.65482e-08	5.55994
GRG3	0.5% NaCl	S12_12610936	12	12610936	1.28368e-07	5.23568
GRG3	0.5% NaCl	S12_12624228	12	12624228	6.35033e-08	5.46079
GRG3	0.5% NaCl	S12_12626265	12	12626265	7.33556e-08	5.41471
GRG3	0.5% NaCl	S12_12627318	12	12627318	5.69047e-08	5.49582
GRG3	0.5% NaCl	S12_12815714	12	12815714	6.56085e-08	5.45037
GRG3	0.5% NaCl	S12_12838375	12	12838375	1.08548e-07	5.28938
GRG3	0.5% NaCl	S12_12841526	12	12841526	7.02439e-08	5.42856
GRG3	0.5% NaCl	S12_12857861	12	12857861	7.63039e-08	5.40211
GRG3	0.5% NaCl	S12_12949667	12	12949667	5.44906e-08	5.50966
GRG3	0.5% NaCl	S12_12959084	12	12959084	6.71259e-08	5.44306
GRG3	0.5% NaCl	S12_12972935	12	12972935	9.96319e-08	5.3168
GRG3	0.5% NaCl	S12_12988822	12	12988822	1.03996e-07	5.30309
GRG3	0.5% NaCl	S12_13101966	12	13101966	7.32519e-08	5.41516
GRG3	0.5% NaCl	S12_13435462	12	13435462	1.40268e-07	5.20729
GRG3	0.5% NaCl	S12_13907177	12	13907177	1.53118e-07	5.1792
GRG3	0.5% NaCl	S12_14085881	12	14085881	1.03981e-07	5.30313
GRG3	0.5% NaCl	S12_15760692	12	15760692	1.39951e-09	6.67069
GRG3	0.5% NaCl	S12_15764841	12	15764841	7.54612e-09	6.13845
GRG3	0.5% NaCl	S12_15772968	12	15772968	1.53883e-08	5.91235
GRG3	0.5% NaCl	S12_16211889	12	16211889	8.68364e-10	6.82084
GRG3	0.5% NaCl	S12_18320548	12	18320548	1.00226e-07	5.3149
GRG3	0.5% NaCl	S12_18363297	12	18363297	1.26699e-07	5.23988
GRG3	0.5% NaCl	S12_18371817	12	18371817	1.13831e-07	5.27416
GRG3	0.5% NaCl	S12_18392203	12	18392203	7.04118e-09	6.1604
GRG3	0.5% NaCl	S12_19862772	12	19862772	3.43229e-08	5.65709
GRG3	0.5% NaCl	S12_19868056	12	19868056	4.29533e-08	5.58558
GRG3	0.5% NaCl	S12_19891678	12	19891678	2.13504e-08	5.80825
GRG3	0.5% NaCl	S12_20908650	12	20908650	7.41543e-08	5.41124
GRG3	0.5% NaCl	S12_21101601	12	21101601	1.32034e-08	5.96099
GRG3	0.5% NaCl	S12_21103643	12	21103643	7.63375e-09	6.1348
GRG3	0.5% NaCl	S12_21116983	12	21116983	1.23856e-08	5.98129
GRG3	0.5% NaCl	S12_21118021	12	21118021	5.91425e-09	6.21563
GRG3	0.5% NaCl	S12_21121234	12	21121234	8.21575e-08	5.37848
GRG3	0.5% NaCl	S12_21130822	12	21130822	3.76405e-08	5.62768
GRG3	0.5% NaCl	S12_22652972	12	22652972	9.28984e-09	6.07255
GRG3	0.5% NaCl	S12_24150149	12	24150149	1.40723e-07	5.20625
GRG3	0.5% NaCl	S12_24161838	12	24161838	8.99887e-08	5.34937
GRG3	0.5% NaCl	S12_24179491	12	24179491	1.10431e-07	5.28387
GRG3	0.5% NaCl	S12_24181251	12	24181251	5.9007e-08	5.48424
GRG3	0.5% NaCl	S12_24182440	12	24182440	9.64048e-08	5.32734
GRG3	0.5% NaCl	S12_24183506	12	24183506	6.34011e-08	5.4613
GRG3	0.5% NaCl	S12_24185658	12	24185658	8.25958e-08	5.37678
GRG3	0.5% NaCl	S12_24186696	12	24186696	6.37861e-08	5.45937
GRG3	0.5% NaCl	S12_24187787	12	24187787	4.89146e-09	6.27572
GRG3	0.5% NaCl	S12_24189027	12	24189027	2.85367e-08	5.7159
GRG3	0.5% NaCl	S12_24190106	12	24190106	1.42024e-08	5.93783
GRG3	0.5% NaCl	S12_24191116	12	24191116	1.01779e-07	5.30998
GRG3	0.5% NaCl	S12_24192392	12	24192392	3.61736e-08	5.64035
GRG3	0.5% NaCl	S12_24193433	12	24193433	1.42646e-09	6.66469
GRG3	0.5% NaCl	S12_24194701	12	24194701	1.63627e-08	5.89284
GRG3	0.5% NaCl	S12_24196184	12	24196184	1.11312e-08	6.01519
GRG3	0.5% NaCl	S12_24197215	12	24197215	8.39517e-09	6.10466
GRG3	0.5% NaCl	S12_24198885	12	24198885	2.31784e-09	6.51168
GRG3	0.5% NaCl	S12_24200128	12	24200128	1.36529e-09	6.67849
GRG3	0.5% NaCl	S12_24201553	12	24201553	2.91395e-08	5.70925
GRG3	0.5% NaCl	S12_24202591	12	24202591	4.52222e-08	5.56916
GRG3	0.5% NaCl	S12_24203701	12	24203701	5.5517e-08	5.50371
GRG3	0.5% NaCl	S12_24204818	12	24204818	2.36685e-08	5.77545
GRG3	0.5% NaCl	S12_24210084	12	24210084	2.82748e-08	5.71884
GRG3	0.5% NaCl	S12_24211367	12	24211367	4.55584e-08	5.5668
GRG3	0.5% NaCl	S12_24212391	12	24212391	1.5775e-09	6.63298
GRG3	0.5% NaCl	S12_24214108	12	24214108	7.61392e-09	6.13562
GRG3	0.5% NaCl	S12_24215478	12	24215478	1.88442e-08	5.84796
GRG3	0.5% NaCl	S12_24217058	12	24217058	2.6409e-08	5.74058
GRG3	0.5% NaCl	S12_24218638	12	24218638	2.06294e-08	5.81917
GRG3	0.5% NaCl	S12_24219881	12	24219881	3.8492e-09	6.3515
GRG3	0.5% NaCl	S12_24222241	12	24222241	4.93124e-08	5.54153
GRG3	0.5% NaCl	S12_24231578	12	24231578	9.68982e-09	6.05918
GRG3	0.5% NaCl	S12_24232635	12	24232635	1.61744e-08	5.89652
GRG3	0.5% NaCl	S12_24234648	12	24234648	9.7288e-09	6.05791
GRG3	0.5% NaCl	S12_24238434	12	24238434	3.36332e-08	5.66356
GRG3	0.5% NaCl	S12_24240601	12	24240601	9.58713e-09	6.06256
GRG3	0.5% NaCl	S12_24241637	12	24241637	8.24707e-08	5.37727
GRG3	0.5% NaCl	S12_24249574	12	24249574	6.35657e-08	5.46047
GRG3	0.5% NaCl	S12_24425527	12	24425527	1.56548e-07	5.1721
GRG3	0.5% NaCl	S12_24462871	12	24462871	8.17186e-08	5.3802
GRG3	0.5% NaCl	S12_25490919	12	25490919	3.07376e-10	7.14666
GRG3	0.5% NaCl	S12_25493096	12	25493096	2.46089e-09	6.49278
GRG3	0.5% NaCl	S12_25494160	12	25494160	7.02698e-09	6.16104
GRG3	0.5% NaCl	S12_25495183	12	25495183	9.35827e-09	6.07023
GRG3	0.5% NaCl	S12_25496236	12	25496236	5.05262e-09	6.26547
GRG3	0.5% NaCl	S12_25497648	12	25497648	3.1892e-09	6.41093
GRG3	0.5% NaCl	S12_25500839	12	25500839	5.66904e-10	6.95477
GRG3	0.5% NaCl	S12_27007864	12	27007864	1.48616e-07	5.18877
GRG4	0.3% NaCl	S02_14772929	2	14772929	1.31863e-07	5.47233
GRG4	0.3% NaCl	S03_13439456	3	13439456	1.19217e-09	7.03652
GRG4	0.3% NaCl	S03_25568102	3	25568102	6.46202e-08	5.71117
GRG4	0.3% NaCl	S04_19891019	4	19891019	6.46511e-08	5.19757
GRG4	0.3% NaCl	S04_19924700	4	19924700	3.38667e-08	5.92698
GRG4	0.3% NaCl	S04_19929893	4	19929893	5.30098e-09	6.54354
GRG4	0.3% NaCl	S04_19930894	4	19930894	2.90641e-08	5.97798
GRG4	0.3% NaCl	S04_19932981	4	19932981	7.57218e-08	5.65813
GRG4	0.3% NaCl	S04_19935283	4	19935283	1.43721e-07	5.44345
GRG4	0.3% NaCl	S04_19936287	4	19936287	1.14843e-07	5.51866
GRG4	0.3% NaCl	S04_19939734	4	19939734	7.26004e-10	7.19977
GRG4	0.3% NaCl	S04_19945751	4	19945751	3.57707e-09	6.67376
GRG4	0.3% NaCl	S04_19948545	4	19948545	6.09832e-10	7.2571
GRG4	0.3% NaCl	S04_19949563	4	19949563	2.96078e-09	6.7363
GRG4	0.3% NaCl	S04_19953925	4	19953925	3.14238e-09	6.71662
GRG4	0.3% NaCl	S04_19958533	4	19958533	2.69821e-10	7.52467
GRG4	0.3% NaCl	S04_19966166	4	19966166	3.11064e-09	6.71997
GRG4	0.3% NaCl	S04_19969697	4	19969697	4.44104e-08	5.83651
GRG4	0.3% NaCl	S04_19979513	4	19979513	1.03762e-08	6.32074
GRG4	0.3% NaCl	S04_19982050	4	19982050	5.10528e-08	5.78995
GRG4	0.3% NaCl	S04_19983055	4	19983055	1.87796e-10	7.64333
GRG4	0.3% NaCl	S04_19985168	4	19985168	1.98367e-08	6.10525
GRG4	0.3% NaCl	S04_19989523	4	19989523	9.04699e-09	6.36626
GRG4	0.3% NaCl	S04_20010414	4	20010414	7.82941e-10	7.17494
GRG4	0.3% NaCl	S04_20012883	4	20012883	1.03304e-09	7.08371
GRG4	0.3% NaCl	S04_20037275	4	20037275	7.76213e-08	5.64984
GRG4	0.3% NaCl	S04_20069206	4	20069206	9.78279e-08	5.57238
GRG4	0.3% NaCl	S04_20549289	4	20549289	7.1948e-08	5.67524
GRG4	0.3% NaCl	S04_20556300	4	20556300	6.43785e-08	5.71242
GRG4	0.3% NaCl	S04_20579265	4	20579265	7.31685e-08	5.66961
GRG4	0.3% NaCl	S04_20583700	4	20583700	1.48482e-07	5.43252
GRG4	0.3% NaCl	S04_20588355	4	20588355	1.13866e-07	5.52152
GRG4	0.3% NaCl	S06_4637190	6	4637190	5.52758e-09	6.52967
GRG4	0.5% NaCl	S02_14746064	2	14746064	7.18901e-08	5.52049
GRG4	0.5% NaCl	S02_14747273	2	14747273	5.16669e-08	5.62791
GRG4	0.5% NaCl	S02_14749420	2	14749420	4.08694e-08	5.70408
GRG4	0.5% NaCl	S02_14772929	2	14772929	3.99198e-09	6.45616
GRG4	0.5% NaCl	S02_28906770	2	28906770	1.60639e-07	4.6267
GRG4	0.5% NaCl	S03_3810624	3	3810624	4.28316e-08	5.68885
GRG4	0.5% NaCl	S03_16682467	3	16682467	3.12048e-08	5.79165
GRG4	0.5% NaCl	S03_16683467	3	16683467	5.30944e-10	7.10315
GRG4	0.5% NaCl	S03_16687589	3	16687589	1.05891e-07	5.39437
GRG4	0.5% NaCl	S03_16688630	3	16688630	4.67665e-08	5.6603
GRG4	0.5% NaCl	S03_16727363	3	16727363	1.46222e-07	5.28914
GRG4	0.5% NaCl	S03_16733441	3	16733441	2.30675e-08	5.88961
GRG4	0.5% NaCl	S03_16787498	3	16787498	1.57184e-07	5.26555
GRG4	0.5% NaCl	S03_16800371	3	16800371	1.49288e-07	5.28237
GRG4	0.5% NaCl	S03_16843782	3	16843782	6.0903e-08	5.57444
GRG4	0.5% NaCl	S03_16855912	3	16855912	3.21667e-08	5.7818
GRG4	0.5% NaCl	S03_16856935	3	16856935	8.62093e-09	6.20795
GRG4	0.5% NaCl	S03_16873239	3	16873239	7.67319e-08	5.49928
GRG4	0.5% NaCl	S03_16902453	3	16902453	4.56369e-08	5.66824
GRG4	0.5% NaCl	S03_22586082	3	22586082	8.24332e-09	6.22241
GRG4	0.5% NaCl	S03_22588103	3	22588103	8.65891e-09	6.20653
GRG4	0.5% NaCl	S03_22597109	3	22597109	3.86521e-09	6.46654
GRG4	0.5% NaCl	S03_22599555	3	22599555	2.41404e-08	5.87488
GRG4	0.5% NaCl	S03_22600688	3	22600688	5.66925e-08	5.59774
GRG4	0.5% NaCl	S03_22609322	3	22609322	1.32242e-08	6.06971
GRG4	0.5% NaCl	S03_22618083	3	22618083	2.92939e-08	5.81215
GRG4	0.5% NaCl	S03_22632415	3	22632415	4.67425e-08	5.66046
GRG4	0.5% NaCl	S03_25568102	3	25568102	7.52916e-09	6.25166
GRG4	0.5% NaCl	S03_28793376	3	28793376	1.75875e-08	5.97746
GRG4	0.5% NaCl	S03_35442231	3	35442231	5.8289e-08	5.58871
GRG4	0.5% NaCl	S03_35452252	3	35452252	4.79231e-08	5.65236
GRG4	0.5% NaCl	S03_35458010	3	35458010	7.70661e-08	5.49786
GRG4	0.5% NaCl	S03_35459340	3	35459340	5.0614e-08	5.63461
GRG4	0.5% NaCl	S03_35475337	3	35475337	6.56608e-08	5.54998
GRG4	0.5% NaCl	S03_35514656	3	35514656	7.77399e-08	5.49503
GRG4	0.5% NaCl	S03_35520336	3	35520336	2.435e-08	5.87208
GRG4	0.5% NaCl	S03_35526854	3	35526854	7.1311e-08	5.52312
GRG4	0.5% NaCl	S03_35527966	3	35527966	9.93338e-08	5.4152
GRG4	0.5% NaCl	S03_35539247	3	35539247	1.2697e-07	5.33519
GRG4	0.5% NaCl	S03_35543960	3	35543960	1.49564e-07	5.28177
GRG4	0.5% NaCl	S03_35546150	3	35546150	1.4347e-07	5.29534
GRG4	0.5% NaCl	S03_35552557	3	35552557	4.96315e-08	5.64098
GRG4	0.5% NaCl	S03_35573733	3	35573733	4.57359e-08	5.66754
GRG4	0.5% NaCl	S03_35579149	3	35579149	5.29017e-08	5.62024
GRG4	0.5% NaCl	S04_2517198	4	2517198	1.52201e-07	5.27606
GRG4	0.5% NaCl	S04_19891019	4	19891019	2.64353e-08	5.1934
GRG4	0.5% NaCl	S04_19907606	4	19907606	1.63388e-08	6.00129
GRG4	0.5% NaCl	S04_19922688	4	19922688	2.73509e-08	5.8344
GRG4	0.5% NaCl	S04_19924700	4	19924700	8.55684e-10	6.95053
GRG4	0.5% NaCl	S04_19929893	4	19929893	5.41186e-09	6.35814
GRG4	0.5% NaCl	S04_19930894	4	19930894	1.21216e-08	6.09786
GRG4	0.5% NaCl	S04_19932981	4	19932981	1.04971e-09	6.8851
GRG4	0.5% NaCl	S04_19935283	4	19935283	6.61887e-11	7.76582
GRG4	0.5% NaCl	S04_19936287	4	19936287	2.37862e-08	5.87967
GRG4	0.5% NaCl	S04_19939734	4	19939734	5.59526e-11	7.81906
GRG4	0.5% NaCl	S04_19945751	4	19945751	6.25643e-12	8.51035
GRG4	0.5% NaCl	S04_19948545	4	19948545	6.25513e-11	7.78373
GRG4	0.5% NaCl	S04_19949563	4	19949563	1.06761e-09	6.87968
GRG4	0.5% NaCl	S04_19950612	4	19950612	9.69898e-09	6.1699
GRG4	0.5% NaCl	S04_19953925	4	19953925	5.99986e-11	7.79694
GRG4	0.5% NaCl	S04_19956359	4	19956359	1.4816e-08	6.03295
GRG4	0.5% NaCl	S04_19958533	4	19958533	3.35836e-11	7.98063
GRG4	0.5% NaCl	S04_19961781	4	19961781	1.77715e-08	5.97409
GRG4	0.5% NaCl	S04_19962791	4	19962791	1.2914e-07	5.32966
GRG4	0.5% NaCl	S04_19966166	4	19966166	3.96945e-10	7.19603
GRG4	0.5% NaCl	S04_19969697	4	19969697	1.10418e-09	6.86889
GRG4	0.5% NaCl	S04_19971849	4	19971849	3.27386e-09	6.51998
GRG4	0.5% NaCl	S04_19975055	4	19975055	5.75837e-10	7.07721
GRG4	0.5% NaCl	S04_19979513	4	19979513	1.49526e-10	7.50706
GRG4	0.5% NaCl	S04_19982050	4	19982050	3.56491e-09	6.49257
GRG4	0.5% NaCl	S04_19983055	4	19983055	1.327e-11	8.27375
GRG4	0.5% NaCl	S04_19985168	4	19985168	1.33776e-10	7.54244
GRG4	0.5% NaCl	S04_19986226	4	19986226	3.59923e-09	6.48949
GRG4	0.5% NaCl	S04_19989523	4	19989523	7.98194e-10	6.97279
GRG4	0.5% NaCl	S04_19991750	4	19991750	3.42039e-08	5.76187
GRG4	0.5% NaCl	S04_19993821	4	19993821	1.29113e-07	5.32973
GRG4	0.5% NaCl	S04_19996562	4	19996562	3.79214e-09	6.47269
GRG4	0.5% NaCl	S04_19997698	4	19997698	2.08404e-09	6.66514
GRG4	0.5% NaCl	S04_20010414	4	20010414	3.58127e-11	7.96031
GRG4	0.5% NaCl	S04_20012883	4	20012883	1.27782e-10	7.55702
GRG4	0.5% NaCl	S04_20018558	4	20018558	5.87495e-09	6.33167
GRG4	0.5% NaCl	S04_20030423	4	20030423	8.61132e-09	6.20831
GRG4	0.5% NaCl	S04_20037275	4	20037275	4.4717e-08	5.67485
GRG4	0.5% NaCl	S04_20041848	4	20041848	1.3105e-08	6.07264
GRG4	0.5% NaCl	S04_20069206	4	20069206	4.45731e-08	5.6759
GRG4	0.5% NaCl	S04_20070266	4	20070266	5.37429e-09	6.36038
GRG4	0.5% NaCl	S04_20556300	4	20556300	1.52114e-07	5.27625
GRG4	0.5% NaCl	S04_20560591	4	20560591	9.21609e-08	5.43962
GRG4	0.5% NaCl	S04_20564813	4	20564813	2.80748e-08	5.82593
GRG4	0.5% NaCl	S04_20579265	4	20579265	5.48735e-09	6.35367
GRG4	0.5% NaCl	S04_20583700	4	20583700	1.27408e-07	5.33407
GRG4	0.5% NaCl	S04_20585960	4	20585960	6.15524e-08	5.57099
GRG4	0.5% NaCl	S04_23383048	4	23383048	4.70739e-08	5.65817
GRG4	0.5% NaCl	S04_23412787	4	23412787	8.10933e-08	5.48128
GRG4	0.5% NaCl	S04_28943033	4	28943033	1.64446e-07	5.25081
GRG4	0.5% NaCl	S05_1271858	5	1271858	6.71714e-08	5.54258
GRG4	0.5% NaCl	S05_1481308	5	1481308	1.12407e-07	5.37491
GRG4	0.5% NaCl	S05_1483543	5	1483543	2.25151e-10	7.37681
GRG4	0.5% NaCl	S05_1521940	5	1521940	1.40579e-07	5.30198
GRG4	0.5% NaCl	S06_757734	6	757734	4.68394e-08	5.65979
GRG4	0.5% NaCl	S06_761876	6	761876	2.72438e-08	5.83567
GRG4	0.5% NaCl	S06_767047	6	767047	1.5937e-07	5.26104
GRG4	0.5% NaCl	S06_6851101	6	6851101	4.71247e-08	5.65782
GRG4	0.5% NaCl	S06_6907904	6	6907904	6.83501e-08	5.53692
GRG4	0.5% NaCl	S06_6992515	6	6992515	5.22594e-08	5.62421
GRG4	0.5% NaCl	S07_29454120	7	29454120	8.40797e-08	5.4695
GRG4	0.5% NaCl	S08_24596147	8	24596147	1.06275e-07	5.39319
GRG4	0.5% NaCl	S08_24613782	8	24613782	8.00017e-09	6.23208
GRG4	0.5% NaCl	S08_24814923	8	24814923	1.4698e-07	5.28745
GRG4	0.5% NaCl	S09_12691292	9	12691292	9.70997e-08	5.42261
GRG4	0.5% NaCl	S11_13049418	11	13049418	8.01317e-08	4.84748
GRG4	0.5% NaCl	S11_16574331	11	16574331	1.19636e-07	5.35459
GRG4	0.5% NaCl	S11_19828922	11	19828922	2.04905e-08	5.92799
GRG4	0.5% NaCl	S11_20296077	11	20296077	1.05865e-07	5.39445
GRG4	0.5% NaCl	S11_23692350	11	23692350	2.04501e-08	5.92863
GRG4	0.5% NaCl	S11_23703283	11	23703283	2.44951e-08	5.87015
GRG4	0.5% NaCl	S11_23972997	11	23972997	1.74426e-08	5.98013
GRG4	0.5% NaCl	S12_11264814	12	11264814	1.46708e-07	5.28806
GRG4	0.5% NaCl	S12_11906183	12	11906183	6.96817e-09	6.27664
GRG4	0.5% NaCl	S12_12600698	12	12600698	8.86814e-08	5.45215
GRG4	0.5% NaCl	S12_22652972	12	22652972	1.59458e-07	5.26086
