# Supplementary material for: Genome-wide association studies identified OsTMF as a gene regulating rice seed germination under salt stress
Source: Front Plant Sci. 2024 Mar 27;15:1384246. doi: 10.3389/fpls.2024.1384246 (PMC11004275; doi:10.3389/fpls.2024.1384246)
Supplement: Supplementary file 12 [file Table_9.xlsx]

## Sheet: Table S9
Table S9 A list of eight candidate genes in the qGRG3-2 locus.
Gene	Annotation
LOC_Os05g48600	OsGT43E, encoding glycosyltransferase family 43 protein, putative, expressed
LOC_Os05g48620	OsTMF, homologue of the human TATA modulatory factor (TMF), transcription activator, regulates cold tolerance through modification of cell wall properties
LOC_Os05g48650	OsDOG1L-2, encoding Delay of Germination 1 (DOG1) -like protein, putative, expressed
LOC_Os05g48670	OsFBT10, encoding F-box and tubby domain containing protein, expressed
LOC_Os05g48730	OsCLE48, encoding CLAVATA3/ENDOSPERM SURROUNDING REGION 48, responses to IAA and inhibites shoot apical meristem development in Arabidopsis
LOC_Os05g48760	encoding unknown function DUF1421 domain containing protein, expressed
LOC_Os05g48900	OsFLA6, encoding fasciclin-like arabinogalactan domain containing protein, expressed
LOC_Os05g48930	OsGRX17, encoding glutaredoxin, functions on the resistance to Xoo via regulating OsTGAL1
